# Supplementary material for: Collecting whales: processes and biases in Nordic museum collections
Source: PeerJ. 2024 Jan 26;12:e16794. doi: 10.7717/peerj.16794 (PMC10823993; doi:10.7717/peerj.16794)
Supplement: Supplemental Information 1 [file peerj-12-16794-s001.xlsx]

## Sheet: NHM Bergen specimens
Preptype	Other museum number	Museum number ZMUB=BM	Pers. obs. specimen	Family	Latin name	Latin genus	Latin species	Sex	Ontogeny	DD	MD	Year	Locality	Municipaliy	County	Country	Collector	Occupation/ title of collector	Aquired how K= bought, G= gift, B = swap, Ex= from field exursion.
B	3784	unummerert		Balaenidae	Balaena mysticetus	Balaena	mysticetus				7	2005	Kapp Thordsen			Svalbard
B	3845	unum.
B	3846	unum.
B	3847	unum.
B	3848	unum.
B	3849	unum.
B	3850	unum.
B	3851	unum.
B	3852	unum.
B	3853	unum.
B	3854	unum.
B	3855	unum.
DO	3284	1700	DID NOT SEE IN EXHIBIT	Delphinidae	Orcinus orca	Orcinus	orca	F		7	1	1907	Ekrhovda		Hordaland	Norway
DO	3285	1701	DID NOT SEE IN EXHIBIT	Delphinidae	Orcinus orca	Orcinus	orca	F		7	1	1907	Ekrhovda		Hordaland	Norway
DO	3241	1479	DID NOT SEE IN EXHIBIT	Platanistidae	Platanista gangetica	Platanista	gangetica					1898	Ganges (elv)			India	G. A. Frank
DO	3272	1661		Phocoenidae	Phocoena phocoena	Phocoena	phocoena					1906
DO	3273	1662		Phocoenidae	Phocoena phocoena	Phocoena	phocoena					1906
DO	3274	1663		Phocoenidae	Phocoena phocoena	Phocoena	phocoena					1906
DO	3298	1740	DID NOT SEE IN EXHIBIT	Delphinidae	Lagenorhynchus acutus	Lagenorhynchus	acutus			13	11	1907	Bildøybakken	Øygarden	Hordaland	Norway
DO	3458	4094	DID NOT SEE IN EXHIBIT	Iniidae	Inia geoffrensis	Inia	geoffrensis					1924	Manacapuru			Brazil	W. Ehrhardt	Fleming, Hamburg
DO	3293	1729		Delphinidae	Lagenorhynchus acutus	Lagenorhynchus	acutus
DO	3156	923		Delphinidae	Lagenorhynchus acutus	Lagenorhynchus	acutus
DO	3157	924		Delphinidae	Orcinus orca	Orcinus	orca
OT	514	BM. 1475	YES Apr 22		Balaena mysticetus	Balaena	mysticetus					1858	Spidsbergen			Svalbard	Jensen, Ole, Hopland (?)		G
OT		BM. 889		Delphinidae	Orcinus orca	Orcinus	orca					1860	Bildøybakken	Fjell	Hordaland	Norway		pack of 12 stranded, some bought by BM. Collett p 709	K
OT	ZU 3152/ Hvalsalen 7733	BM. 880	YES Nov 22	Delphinidae	Globicephala melas	Globicephala	melas			2	8	1866	Ålesund	Ålesund	Møre og Romsdal	Norway	Hansen (Konsul)	Konsul	G
OT	584	BM. 334	YES Apr 22	Delphinidae	Globicephala melas	Globicephala	melas					1869	Hisken	Bømlo	Hordaland	Norway	Captured in fjord and killed. Collett p 701		K
OT		BM. 881	YES Apr + Nov 22	Delphinidae	Globicephala melas	Globicephala	melas					1869	Bergen	Bergen	Hordaland	Norway
OT	ZU 3040/ 7722	BM. 333	YES Apr 22	Delphinidae	Globicephala melas	Globicephala	melas		Foe	30	05	1874	Møgster	Sund	Hordaland	Norway	Captured in fjord and killed. Collett p 700		K
OT	7725	BM. 879	YES Apr + Nov 22	Delphinidae	Globicephala melas	Globicephala	melas				5	1874	Møgster		Hordaland	Norway	Captured in fjord and killed. Collett p 700		K
OT	ZU 3149	BM. 871	YES Apr + Nov 22	Ziphiidae	Hyperoodon ampullatus	Hyperoodon	ampullatus					1874	Oslo			Norway
OT	ZU 3049	BM. 420	YES Apr 22 + Nov 22	Balaenopteridae	Balaenoptera musculus	Balaenoptera	musculus					1879	Finnmark		Finnmark	Norway
OT	536	BM. 338	YES Apr 22	Delphinidae	Delphinus delphis	Delphinus	delphis					1880	Atlanterhavet ?				Svendsen (kaptein)	Captain	G
OT		BM. 341		Delphinidae	Lagenorhynchus acutus	Lagenorhynchus	acutus					1880	Bergen	Bergen	Hordaland	Norway
OT		BM. 3821	YES Apr + Nov 22	Balaenopteridae	Megaptera novaeangliae	Megaptera	novaeangliae					1883	Vardø			Norway	(Bull)(Kaptein)	Captain
OT		BM. 721		Delphinidae	Lagenorhynchus acutus	Lagenorhynchus	acutus			9	11	1885	Torska, Manger	Radøy	Hordaland	Norway		Large pack of 1000 specimens, 200-300 were killed, skeletons and foetuses were bought by Bm, by Fridtjof nansen, conservator. Collett p 689	K
OT		BM. 722		Delphinidae	Lagenorhynchus acutus	Lagenorhynchus	acutus			9	11	1885	Torska, Manger	Radøy	Hordaland	Norway		Large pack of 1000 specimens, 200-300 were killed, skeletons and foetuses were bought by Bm, by Fridtjof nansen, conservator. Collett p 689	K
OT		BM. 726		Delphinidae	Lagenorhynchus acutus	Lagenorhynchus	acutus			9	11	1885	Torska, Manger	Radøy	Hordaland	Norway		Large pack of 1000 specimens, 200-300 were killed, skeletons and foetuses were bought by Bm, by Fridtjof nansen, conservator. Collett p 689	K
OT	ZU 3047	BM. 417		Delphinidae	Lagenorhynchus albirostris	Lagenorhynchus	albirostris			13	5	1887	Bildøysund	Fjell	Hordaland	Norway		Mindre steng ved Bildø, mange kjøpt av Bergen museum. Kilde Collett p 681	K
OT		BM. 680	YES Apr + Nov 22	Delphinidae	Lagenorhynchus albirostris	Lagenorhynchus	albirostris			13	5	1887	Bildøy	Fjell	Hordaland	Norway		Mindre steng ved Bildø, mange kjøpt av Bergen museum. Kilde Collett p 681	K
OT		BM. 681	YES Apr 22	Delphinidae	Lagenorhynchus albirostris	Lagenorhynchus	albirostris			13	5	1887	Bildøy	Fjell	Hordaland	Norway		Mindre steng ved Bildø, mange kjøpt av Bergen museum. Kilde Collett p 681	K
OT		BM. 563	YES Apr 22	Delphinidae	Orcinus orca	Orcinus	orca				11	1887	Bildøy	Fjell	Hordaland	Norway			K
OT		BM. 564	YES Apr 22	Delphinidae	Orcinus orca	Orcinus	orca				11	1887	Bildøy	Fjell	Hordaland	Norway			K
OT	585	BM. 344	YES Apr 22	Balaenopteridae	Balaenoptera borealis	Balaenoptera	borealis					1889	Sørvær	Hasvik	Finnmark	Norway	Brunchorst (Dr.)	Doctor	K
OT	ZU 2904/ Hvalsalen 7744	BM. 15	YES Apr + Nov 22	Balaenidae	Eubalaena glacialis	Eubalaena	glacialis					1891	Island			Iceland	Guldberg, G. A. (skrivefeil)		K
OT	ZU 3175	BM. 1087	YES Nov 22	Balaenopteridae	Balaenoptera acutorostrata	Balaenoptera	acutorostrata		Foe	14	6	1895	Skogsvåg	Fjell/Sund	Hordaland	Norway			K
OT		BM. 1393	YES Apr 22	Physeteridae	Physeter catodon	Physeter	catodon				5	1896		Båtsfjord	Finnmark	Norway			K
OT	ZU 3050/ 7742	BM. 421	YES Apr 22	Balaenopteridae	Balaenoptera borealis	Balaenoptera	borealis					1897	Sørøen			Norway	Bull, M. (kaptein)	Captain	K
OT		BM. 2239		Delphinidae	Lagenorhynchus acutus	Lagenorhynchus	acutus		Foe	17	9	1913
OT		BM. 2907	YES Apr 22	Phocoenidae	Phocoena phocoena	Phocoena	phocoena					1914	Bergen	Bergen	Hordaland	Norway			K
OT		BM. 2908	YES Apr 22	Phocoenidae	Phocoena phocoena	Phocoena	phocoena					1914	Bergen	Bergen	Hordaland	Norway			K
OT		BM. 2909	YES Apr 22	Phocoenidae	Phocoena phocoena	Phocoena	phocoena					1914	Bergen	Bergen	Hordaland	Norway			K
OT		BM. 2910	YES Apr 22	Phocoenidae	Phocoena phocoena	Phocoena	phocoena					1914	Bergen	Bergen	Hordaland	Norway			K
OT		BM. 4193		Delphinidae	Lagenorhynchus acutus	Lagenorhynchus	acutus			15	8	1931	Bildøybakken	Fjell	Hordaland	Norway			G
OT		BM. 4194		Delphinidae	Lagenorhynchus acutus	Lagenorhynchus	acutus			15	8	1931	Bildøybakken	Fjell	Hordaland	Norway			G
OT		BM. 4195		Delphinidae	Lagenorhynchus acutus	Lagenorhynchus	acutus			15	8	1931	Bildøybakken	Fjell	Hordaland	Norway			G
OT		BM. 4196		Delphinidae	Lagenorhynchus acutus	Lagenorhynchus	acutus			15	8	1931	Bildøybakken	Fjell	Hordaland	Norway			G
OT		BM. 4197		Delphinidae	Lagenorhynchus acutus	Lagenorhynchus	acutus			15	8	1931	Bildøybakken	Fjell	Hordaland	Norway			G
OT		BM. 4198		Delphinidae	Lagenorhynchus acutus	Lagenorhynchus	acutus			15	8	1931	Bildøybakken	Fjell	Hordaland	Norway			G
OT	544	BM. 4192		Delphinidae	Lagenorhynchus acutus	Lagenorhynchus	acutus			15	8	1931	Bildøybakken	Fjell	Hordaland	Norway	Bj. Knorn (?) auktion		G
OT	527	BM. 4299	YES Apr 22	Phocoenidae	Phocoena phocoena	Phocoena	phocoena		Juv	20	7	1935	Nordsjøen			Norway			G I guess?
OT	529	B. 2086	YES Apr 22	Phocoenidae	Phocoena phocoena	Phocoena	phocoena			03	06	1971	V. av Sotra		Hordaland	Norway	Institute of Marine Research	Research institusion
OT		BM. 2768	YES Apr 22	Delphinidae	Globicephala melas	Globicephala	melas					1981
OT		B. 2904	YES Apr 22	Delphinidae	Globicephala melas	Globicephala	melas			pr	11	1983	Øksnes	Austrheim	Hordaland	Norway
OT	7615	B. 3258	YES Apr 22	Phocoenidae	Phocoena phocoena	Phocoena	phocoena					1987	Fosenstraumen	Radøy	Hordaland	Norway	Hufthammer, A.K.	Museum staff BM
OT	4925	B. 6675	YES Apr 22	Phocoenidae	Phocoena phocoena	Phocoena	phocoena			12	07	1989	V.f.Øygard	Øygarden	Hordaland	Norway	Magnus Midtøy
OT	6681	B. 6676	YES Apr 22	Phocoenidae	Phocoena phocoena	Phocoena	phocoena			05	06	1993		Øygarden	Hordaland	Norway	Magnus Midtøy
OT	6686	B. 6677	YES Apr 22	Phocoenidae	Phocoena phocoena	Phocoena	phocoena			05	06	1993		Øygarden	Hordaland	Norway	Magnus Midtøy
OT	9314	B. 8989	YES Apr + Nov 22	Balaenopteridae	Balaenoptera musculus	Balaenoptera	musculus					2001	Kapp Wien, Jan Mayen	Jan Mayen	Jan Mayen	Jan Mayen	Hvalfangst Museet i Sandefjord	Museum staff other museum	G? or did they pay?
OT	8593	B. 8565	YES Apr 22	Delphinidae	Lagenorhynchus acutus/albirostris	Lagenorhynchus	acutus/albirostris					2008	Berhaugstranda, Høylandsbygda	Kvinnherad	Hordaland	Norway	Hauge barnehage	Hauge barnehage	G I guesss
OT	13546	B. 9094	YES Apr + Nov 22	Delphinidae	Lagenorhynchus albirostris	Lagenorhynchus	albirostris				11	2012	Jeløy	Moss	Østfold	Norway	Eivind Sørnes
OT	9614	B. 9005	YES Apr 22	Phocoenidae	Phocoena phocoena	Phocoena	phocoena			01	03	2014	Lotrebogane, Vabø	Lindåa	Hordaland	Norway	Vabø, Audun		Drowned in fishing net
OT	8743	BM. 331	YES Apr 22	Balaenidae	Eubalaena glacialis	Eubalaena	glacialis										Nat.hist. Newcastle	Museum staff other museum	G
OT		BM. 340	YES Apr 22	Delphinidae	Steno bredanensis	Steno	bredaensis										Barstad (kjøbmand)	Kjøbmand	G
OT		BM. 2773	YES Apr 22	Balaenopteridae	Balaenoptera acutorostrata	Balaenoptera	acutorostrata
OT		unummerert		Balaenopteridae	Balaenoptera acutorostrata	Balaenoptera	acutorostrata
OT		B. 8673 (note says "kan vere BM 422")	YES Apr 22	Balaenopteridae	Balaenoptera borealis	Balaenoptera	borealis
OT		BM. 2772	YES Apr 22	Balaenopteridae	Balaenoptera borealis	Balaenoptera	borealis
OT		UNR	YES Apr 22	Balaenopteridae	Balaenoptera borealis	Balaenoptera	borealis
OT		B. 8205	YES Apr 22	Monodontidae	Delphinapterus leucas	Delphinapterus	leucas
OT		B. 8206	YES Apr + Nov 22	Monodontidae	Delphinapterus leucas	Delphinapterus	leucas
OT		B. 8990	YES - several specimens	Delphinidae	Orcinus orca	Orcinus	orca
OT		BM. 1375	YES Apr 22	Delphinidae	Orcinus orca	Orcinus	orca		Juv
OT		BM. 1376	YES Apr 22	Delphinidae	Orcinus orca	Orcinus	orca
OT		unummerert	The one in Hvalsalen?? Named ZU 3045 in the exhibit	Phocoenidae	Phocoena phocoena	Phocoena	phocoena
OT		BM. 345	YES Apr 22	Balaenopteridae	Balaenoptera physalus	Balaenoptera	physalus
OT		UNR		Delphinidae	Lagenorhynchus sp.	Lagenorhynchus	sp,
OT	ZU 3748	Hvalsalen	YES Nov 22	Monodontidae	Delphinapterus leucas	Delphinapterus	leucas									Arctic Ocean
OT	ZU 3046/ 7746	BM. 414	YES Apr + Nov 22	Delphinidae	Sotalia fluviatilis	Sotalia	fluviatilis						Rio de Janeiro			Brazil	Beneden van (Prof.)	Professor	B
OT	ZU 3154?	BM. 887	YES Nov 22	Monodontidae	Monodon monoceros	Monodon	monoceros						Grønland			Greenland
OT	513	BM. 4400	YES Apr 22	Physeteridae	Physeter catodon	Physeter	catodon						Island			Iceland	Hopp, Gunnar (skolegutt)	School boy	G
OT	534	BM. 336	YES Apr 22	Delphinidae	Delphinus delphis	Delphinus	delphis						Nordsjøen			Norway	de Vries (kaptein)	Captain, Rotterdam	G
OT	533	BM. 335	YES Apr 22	Delphinidae	Delphinus delphis	Delphinus	delphis						Nordsjøen			Norway	Grieg, Joachim (kaptein)	Captain	G
OT	535	BM. 337	YES Apr 22	Delphinidae	Delphinus delphis	Delphinus	delphis						Nordsjøen			Norway	Holmboe, J. (Dr.)	Doctor	G
OT	ZU 3041	BM. 342	YES Apr 22	Balaenopteridae	Balaenoptera acutorostrata	Balaenoptera	acutorostrata		Foetu/ note says juv.				Skogsvåg	Fjell/Sund	Hordaland	Norway			K
OT		Note in journal: 49 hvirvler, 9 haemafylsialbuer, 11 par ribben. Luffer ukomplett 2.4.2.1 og 2.4.3.0 (?). Bekkenben mangler. Note kartotekkort: "Skelet", "?. S."	YES Apr 22	Balaenopteridae	Balaenoptera acutorostrata	Balaenoptera	acutorostrata						Skogsvågen	Fjell/Sund	Hordaland	Norway
OT		BM. 339		Delphinidae	Lagenorhynchus albirostris	Lagenorhynchus	albirostris						Bergen	Bergen	Hordaland	Norway
OT		BM. 872	YES Nov 22	Ziphiidae	Hyperoodon ampullatus	Hyperoodon	ampullatus						Bergen			Norway
OT	ZU 3044	BM. 412	YES Nov 22	Delphinidae	Delphinus delphis	Delphinus	delphis							Bergen	Hordaland	Norway
OT	ZU 3045 NB porpoise in exhibit has this number!	BM. 413		Delphinidae	Delphinus delphis	Delphinus	delphis						Bergen	Bergen	Hordaland	Norway
OT		BM. 684	YES Apr 22	Delphinidae	Orcinus orca	Orcinus	orca						Vestkysten			Norway
OT		BM. 876	YES Apr 22	Delphinidae	Orcinus orca	Orcinus	orca						Bergen	Bergen	Hordaland	Norway
OT		BM. 877	YES Apr + Nov 22	Delphinidae	Orcinus orca	Orcinus	orca						Bergen	Bergen	Hordaland	Norway
OT	ZU 3151	BM. 878	YES Nov 22	Delphinidae	Orcinus orca	Orcinus	orca						Bergen	Bergen	Hordaland	Norway
OT	ZU 3052	BM. 424	YES Apr 22	Balaenopteridae	Balaenoptera physalus	Balaenoptera	physalus	F		18	1	1867	Florø	Flora	Sogn og Fjordane	Norway			should be possible to find out, classical specimen, was exhibited for 100 years
OT		unummerert - antakelig BM 870	YES Nov 22	Balaenopteridae	Balaenoptera acutorostrata	Balaenoptera	acutorostrata	F				1869	Skogsvåg	Sund	Hordaland	Norway
OT		BM. 1476	YES Apr + Nov 22	Delphinidae	Lagenorhynchus acutus	Lagenorhynchus	acutus	F		28	2	1874	Haugesund	Haugesund	Rogaland	Norway			K
OT	ZU 3039	BM. 332	YES Apr 22	Phocoenidae	Phocoena phocoena	Phocoena	phocoena	F	Foe	22	7	1888	Hjeltefjorden		Hordaland	Norway			K
OT		BM. 714	YES Apr + Nov 22	Delphinidae	Lagenorhynchus acutus	Lagenorhynchus	acutus	F		15	04	1889	Bildøy	Fjell	Hordaland	Norway			K
OT		BM. 689		Delphinidae	Lagenorhynchus albirostris	Lagenorhynchus	albirostris	F		15	04	1889	Bildøy	Fjell	Hordaland	Norway		Større steng ved Bildø, mange eks kjøpt at BM. Collett p 681	K
OT		BM. 690	YES Apr + Nov 22	Delphinidae	Lagenorhynchus albirostris	Lagenorhynchus	albirostris	F		15	04	1889	Bildøy	Fjell	Hordaland	Norway		Større steng ved Bildø, mange eks kjøpt at BM. Collett p 681	K
OT		BM. 695	YES Apr + Nov 22	Delphinidae	Lagenorhynchus albirostris	Lagenorhynchus	albirostris	F		15	04	1889	Bildøy	Fjell	Hordaland	Norway		Større steng ved Bildø, mange eks kjøpt at BM. Collett p 681	K
OT		BM. 702	YES Apr 22	Delphinidae	Lagenorhynchus albirostris	Lagenorhynchus	albirostris	F		15	04	1889	Bildøy	Fjell	Hordaland	Norway		Større steng ved Bildø, mange eks kjøpt at BM. Collett p 681	K
OT		BM. 710	YES Apr + Nov 22	Delphinidae	Lagenorhynchus albirostris	Lagenorhynchus	albirostris	F		15	04	1889	Bildøy	Fjell	Hordaland	Norway		Større steng ved Bildø, mange eks kjøpt at BM. Collett p 681	K
OT		BM. 711	YES Apr + Nov 22	Delphinidae	Lagenorhynchus albirostris	Lagenorhynchus	albirostris	F		15	04	1889	Bildøy	Fjell	Hordaland	Norway		Større steng ved Bildø, mange eks kjøpt at BM. Collett p 681	K
OT		BM. 911	YES Apr 22	Ziphiidae	Hyperoodon ampullatus	Hyperoodon	ampullatus	F	Juv	25	7	1890	Kristiansund	Kristiansund	Møre og Romsdal	Norway	Astrup, M. H. (Grosserer)	Grosserer	G
OT	ZU 3180/ Hvalsalen 7749	BM. 1097	YES Nov 22	Ziphiidae	Mesoplodon bidens	Mesoplodon	bidens	F		29	8	1895	Viksnes, Karmøy	Karmøy	Rogaland	Norway	Døsseland, A.	stranded, to museum. Collett p 651. Description Grieg 1897.	K
OT	520	BM. 3001	YES Apr 22	Phocoenidae	Phocoena phocoena	Phocoena	phocoena	F	Foe	19	5	1918	Sidkoven		Nordland	Norway	Oksnes, Oluf		K
OT		BM. 4032	YES Apr 22	Delphinidae	Lagenorhynchus albirostris	Lagenorhynchus	albirostris	F		11	05	1925	Tanahavn	Tana	Finnmark	Norway
OT	7482	B. 492	YES Apr 22	Phocoenidae	Phocoena phocoena	Phocoena	phocoena	F			06	1944	Herøyfjorden	Søgne	Vest-Agder	Norway	Valeur, Peter	Zool. mus.
OT	525	B. 491	YES Apr 22	Phocoenidae	Phocoena phocoena	Phocoena	phocoena	F			07	1948	Ny-Hellesund	Søgne	Vest-Agder	Norway	Valeur, Peter	Zool. mus.
OT	526	B. 938	YES Apr 22	Phocoenidae	Phocoena phocoena	Phocoena	phocoena	F	Juv	14	02	1960	Grunnosen, Fana	Bergen	Hordaland	Norway	Myntevik	Biol.st. Espegrend
OT	532	B. 1241	YES Apr 22	Delphinidae	Delphinus delphis	Delphinus	delphis	F		03	06	1963	Sunndalsfjorden	Sunndal	Møre og Romsdal	Norway	Sunndal fiskefor.	Sunndal fiskefor.
OT	530	B. 1321	YES Apr 22	Phocoenidae	Phocoena phocoena	Phocoena	phocoena	F		28	05	1964	Akvariet	Bergen	Hordaland	Norway	Institute of Marine Research	Research institusion
OT	515	B. 1497	YES Apr 22	Phocoenidae	Phocoena phocoena	Phocoena	phocoena	F				1965					Institute of Marine Research	Research institusion
OT	515	B. 1498	YES Apr 22	Phocoenidae	Phocoena phocoena	Phocoena	phocoena	F	Juv			1965					Institute of Marine Research	Research institusion
OT		B. 1780		Phocoenidae	Phocoena phocoena	Phocoena	phocoena	F		01	05	1970	Bredvik-Lærdale	Askøy	Hordaland	Norway
OT	3119	B. 7404	YES Apr 22	Delphinidae	Delphinus delphis	Delphinus	delphis	F	Juv	17	04	1996	Myking	Lindås	Hordaland	Norway	Fredriksen, Tore	Museum staff BM
OT	8587	B. 7476	YES Apr 22	Phocoenidae	Phocoena phocoena	Phocoena	phocoena	F		13	02	1997	Vabø	Lindås	Hordaland	Norway	Vabø, Audun
OT	8289	B. 8219	YES Apr + Nov 22	Delphinidae	Globicephala melas	Globicephala	melas	F	adult	14	06	2003	Vik, Toftøy	Øygarden	Hordaland	Norway	Teknisk etat, Øygarden kommune	Teknisk etat, Øygarden kommune
OT		BM. 2767	YES Apr 22	Delphinidae	Lagenorhynchus albirostris	Lagenorhynchus	albirostris	FM					Bildøbakken	Fjell	Hordaland	Norway
OT		BM. 2766	YES (actually 3 specimens)	Delphinidae	Orcinus orca	Orcinus	orca	FM					Bildøbakken	Fjell	Hordaland	Norway
OT	ZU 3148	BM. 869	YES Apr 22	Balaenopteridae	Balaenoptera acutorostrata	Balaenoptera	acuturostrata	M		4	2	1860	Skogsvågen	Fjell/Sund	Hordaland	Norway
OT	ZU 3051	BM. 423	YES Apr 22 + Nov 22	Balaenopteridae	Balaenoptera physalus	Balaenoptera	physalus	M		10	10	1865	Utsira	Utsira	Rogaland	Norway
OT	ZU 3753	BM. 419	YES (Has been in Hvalsalen)	Ziphiidae	Hyperoodon ampullatus	Hyperoodon	ampullatus	M	Ad		1	1884	Kiilstrømmen	?Ulvøen	Hordaland	Norway			K
OT		BM. 715		Delphinidae	Lagenorhynchus acutus	Lagenorhynchus	acutus	M		9	11	1885	Torska, Manger	Radøy	Hordaland	Norway		Large pack of 1000 specimens, 200-300 were killed, skeletons and foetuses were bought by Bm, by Fridtjof nansen, conservator. Collett p 689	K
OT		BM. 716		Delphinidae	Lagenorhynchus acutus	Lagenorhynchus	acutus	M	Juv	9	11	1885	Torska, Manger	Radøy	Hordaland	Norway		Large pack of 1000 specimens, 200-300 were killed, skeletons and foetuses were bought by Bm, by Fridtjof nansen, conservator. Collett p 689	K
OT	8743	BM. 330	YES Apr 22	Physeteridae	Physeter catodon	Physeter	catodon	M		00	05	1889	Orre, Jæren		Rogaland	Norway	Kjelland, Alex. L. (skrivefeil - antakelig den Alexander Kielland)	Editor/ writer	G
OT		BM. 693	YES Apr + Nov 22	Delphinidae	Lagenorhynchus albirostris	Lagenorhynchus	albirostris	M		15	04	1889	Bildøy	Fjell	Hordaland	Norway		Større steng ved Bildø, mange eks kjøpt at BM. Collett p 681	K
OT		BM. 694	YES Apr 22	Delphinidae	Lagenorhynchus albirostris	Lagenorhynchus	albirostris	M		15	04	1889	Bildøy	Fjell	Hordaland	Norway		Større steng ved Bildø, mange eks kjøpt at BM. Collett p 681	K
OT		BM. 696	YES Apr + Nov 22	Delphinidae	Lagenorhynchus albirostris	Lagenorhynchus	albirostris	M		15	04	1889	Bildøy	Fjell	Hordaland	Norway		Større steng ved Bildø, mange eks kjøpt at BM. Collett p 681	K
OT		BM. 699	YES Apr 22	Delphinidae	Lagenorhynchus albirostris	Lagenorhynchus	albirostris	M		15	04	1889	Bildøy	Fjell	Hordaland	Norway		Større steng ved Bildø, mange eks kjøpt at BM. Collett p 681	K
OT		BM. 700	YES Apr + Nov 22	Delphinidae	Lagenorhynchus albirostris	Lagenorhynchus	albirostris	M		15	04	1889	Bildøy	Fjell	Hordaland	Norway		Større steng ved Bildø, mange eks kjøpt at BM. Collett p 681	K
OT		BM. 701	YES Apr 22	Delphinidae	Lagenorhynchus albirostris	Lagenorhynchus	albirostris	M		15	04	1889	Bildøy	Fjell	Hordaland	Norway		Større steng ved Bildø, mange eks kjøpt at BM. Collett p 681	K
OT		BM. 703	YES Apr + Nov 22	Delphinidae	Lagenorhynchus albirostris	Lagenorhynchus	albirostris	M		15	04	1889	Bildøy	Fjell	Hordaland	Norway		Større steng ved Bildø, mange eks kjøpt at BM. Collett p 681	K
OT		BM. 704	YES Apr 22	Delphinidae	Lagenorhynchus albirostris	Lagenorhynchus	albirostris	M		15	04	1889	Bildøy	Fjell	Hordaland	Norway		Større steng ved Bildø, mange eks kjøpt at BM. Collett p 681	K
OT		BM. 705	YES Apr 22	Delphinidae	Lagenorhynchus albirostris	Lagenorhynchus	albirostris	M		15	04	1889	Bildøy	Fjell	Hordaland	Norway		Større steng ved Bildø, mange eks kjøpt at BM. Collett p 681	K
OT		BM. 706	YES Apr 22	Delphinidae	Lagenorhynchus albirostris	Lagenorhynchus	albirostris	M		15	04	1889	Bildøy	Fjell	Hordaland	Norway		Større steng ved Bildø, mange eks kjøpt at BM. Collett p 681	K
OT		BM. 713	YES Apr + Nov 22	Delphinidae	Lagenorhynchus albirostris	Lagenorhynchus	albirostris	M		15	04	1889	Bildøy	Fjell	Hordaland	Norway		Større steng ved Bildø, mange eks kjøpt at BM. Collett p 681	K
OT	7682/ 2915	BM. 59	YES Apr 22	Physeteridae	Physeter catodon	Physeter	catodon	M				1890	Ke de Re' Bretagne			France	Museum historie Naturelle, Paris	Museum staff other museum	B
OT		BM. 33	YES Apr + Nov 22	Delphinidae	Globicephala melas	Globicephala	melas	M		30	08	1893	Bildøbakken	Fjell	Hordaland	Norway			K
OT	508	BM. 1102	YES Apr 22	Ziphiidae	Mesoplodon bidens	Mesoplodon	bidens	M		26	8	1895	Fæøy	Haugesund	Rogaland	Norway	Døsseland, A	shot, to museum Collett p 651. Description Grieg 1897.	K
OT	509	BM. 2776		Ziphiidae	Mesoplodon bidens	Mesoplodon	bidens	M	old	14	11	1901	Rugsund	Bremanger	Sogn og Fjordane	Norway	Kvalheim, Wilhelm (Lærer)	Teacher. Story in Collett p 652-653. Description Grieg 1904	K
OT		BM. 1591	YES Apr 22	Monodontidae	Delphinapterus leucas	Delphinapterus	leucas	M		28	5	1903	Ålesund	Ålesund	Møre og Romsdal	Norway			K
OT	524	B. 490	YES Apr 22	Phocoenidae	Phocoena phocoena	Phocoena	phocoena	M			06	1943	Ny-Hellesund	Søgne	Vest-Agder	Norway	Valeur, Peter	Zool. mus.
OT	523	B. 489	YES Apr 22	Phocoenidae	Phocoena phocoena	Phocoena	phocoena	M		12	07	1956	Langenes	Søgne	Vest-Agder	Norway	Valeur, Peter	Zool. mus.
OT	521	B. 1319	YES Apr 22	Phocoenidae	Phocoena phocoena	Phocoena	phocoena	M		28	05	1964	Akvariet	Bergen	Hordaland	Norway	Institute of Marine Research	Research institusion
OT	8744	B. 1320	YES Apr 22	Phocoenidae	Phocoena phocoena	Phocoena	phocoena	M		28	05	1964	Akvariet	Bergen	Hordaland	Norway	Institute of Marine Research	Research institusion
OT	531	B. 1322	YES Apr 22	Phocoenidae	Phocoena phocoena	Phocoena	phocoena	M		28	05	1964	Akvariet	Bergen	Hordaland	Norway	Institute of Marine Research	Research institusion
OT	3758	B. 2834	YES Apr 22	Phocoenidae	Phocoena phocoena	Phocoena	phocoena	M			12	1981	Vest for Sotra		Hordaland	Norway	Institute of Marine Research	Research institusion
OT	7096	B. 7039 = CN 248	YES Apr 22	Physeteridae	Physeter catodon	Physeter	catodon	M	12 years	17	01	1995	Hennestrand			Denmark
OT	8624	B. 8595	YES Apr 22	Phocoenidae	Phocoena phocoena	Phocoena	phocoena	M		10	07	2000	Steinesvågen	Finnøy	Rogaland	Norway	Skartveit, Jon	ZMB, UiB
OT	13547	B. 9095	YES Apr 22	Ziphiidae	Mesoplodon bidens	Mesoplodon	bidens	M				2011	Bøvagen	Radøy	Hordaland	Norway	Hege Johannes Hauge		Ex
OT	13545	B. 9073	YES Nov 22	Ziphiidae	Ziphius cavirostris	Ziphius	cavirostris	M		28	01	2017	Vindenes ved ågotnes	Fjell	Hordaland	Norway	Terje Lislevand	Museum staff BM	Ex
OT	ZU 3153 = ZU 3240?	BM. 883	YES Nov 22	Delphinidae	Lagenorhynchus acutus	Lagenorhynchus	acutus	M					Bergen	Bergen	Hordaland	Norway
OT	3749	unummerert	YES Nov 22	Balaenopteridae	Balaenoptera acutorostrata	Balaenoptera	acutorostrata	M
OT	ZU 3048 = NB marked as ZU 3038 in exhibit	BM. 418	YES Apr + Nov 22	Delphinidae	Lagenorhynchus albirostris	Lagenorhynchus	albirostris			13	5	1887	Bildøysund	Fjell	Hordaland	Norway		Mindre steng ved Bildø, mange kjøpt av Bergen museum. Kilde Collett p 681	K
OT		BM. 708	YES Apr + Nov 22	Delphinidae	Lagenorhynchus albirostris	Lagenorhynchus	albirostris			15	04	1889	Bildøy	Fjell	Hordaland	Norway		Større steng ved Bildø, mange eks kjøpt at BM. Collett p 681	K
OT	3459	BM 4095	YES Apr + Nov 22	Iniidae	Inia geoffrensis	Inia	geoffrensis			7	10	1924	Manacapuru	Manacapuru, Amazonfloden	Amazonas	Brazil
OT		BM. 9229	YES Apr 22	Delphinidae	Stenella coeruleoalba	Stenella	coeruleoalba					2021		Askøy	Hordaland	Norway
OT	3785	unummerert	DID NOT SEE IN EXHIBIT	Balaenidae	Balaena mysticetus	Balaena	mysticetus						Sæbø	Stord	Hordaland	Norway
OT	3786	unummerert	DID NOT SEE IN EXHIBIT	Balaenidae	Balaena mysticetus	Balaena	mysticetus						Blomvåg	Øygarden	Hordaland	Norway
OT	3787	unummerert	DID NOT SEE IN EXHIBIT	Balaenidae	Balaena mysticetus	Balaena	mysticetus						Blomvåg	Øygarden	Hordaland	Norway
OT		unnumbered	YES Apr 22	?	?	?	?
OT		unnumbered	YES Apr 22	?	?	?	?
OT		unnnumbered	YES Apr 22	?	?	?	?
OT	3750	unummerert		Ziphiidae	Hyperoodon ampullatus	Hyperoodon	ampullatus
OT		unummerert	YES Apr 22	Delphinidae	Globicephala melas	Globicephala	melas
OT		unnumbered	YES Apr 22		Orcinus orca	Orcinus	orca
OT	ZU 3752	unum.	YES Nov 22	Delphinidae	Orcinus orca	Orcinus	orca
OT	3819	unum.
WF		ZMUB 001335	YES Nov 22 w picture/ note	Balaenopteridae	Balaenoptera acutorostrata	Balaenoptera	acutorostrata		Foe	06	08	1860	Skogsvåg	Sund	Hordaland	Norway
WF		ZMUB 001278	Hansahallen - assume database is correct	Delphinidae	Globicephala melas	Globicephala	melas		Foe		01	1869	Hiskjo/ Hisken	Bømlo	Hordaland	Norway	Captured in fjord and killed. Collett p 701		K
WF		ZMUB 001280	Hansahallen - assume database is correct	Delphinidae	Globicephala melas	Globicephala	melas		Foe		01	1869	Hiskjo/ Hisken	Bømlo	Hordaland	Norway	Captured in fjord and killed. Collett p 701		K
WF		ZMUB 001281	Hansahallen - assume database is correct	Delphinidae	Globicephala melas	Globicephala	melas		Foe		01	1869	Hiskjo/ Hisken	Bømlo	Hordaland	Norway	Captured in fjord and killed. Collett p 701		K
WF		ZMUB 001269	Hansahallen - assume database is correct	Balaenopteridae	Balaenoptera acutorostrata	Balaenoptera	acutorostrata		Foe			1869	Skogsvåg	Sund	Hordaland	Norway
WF		ZMUB 001133	YES Nov 22 w picture/ note	Monodontidae	Delphinapterus leucas	Delphinapterus	leucas		Foe	14	08	1869			Spitsbergen	Svalbard		mentioned in Collett p 668, there was originially 3 foetuses
WF		ZMUB 001135	Hansahallen - assume database is correct	Monodontidae	Delphinapterus leucas	Delphinapterus	leucas		Foe	14	08	1869			Spitsbergen	Svalbard		mentioned in Collett p 668, there was originially 3 foetuses
WF		ZMUB 001271	Hansahallen - assume database is correct	Balaenopteridae	Balaenoptera acutorostrata	Balaenoptera	acutorostrata		Foe			1871	Skogsvåg	Sund	Hordaland	Norway
WF		ZMUB 001229	YES Nov 22 w picture/ note	Balaenopteridae	Balaenoptera acutorostrata	Balaenoptera	acutorostrata		Foe	12	06	1877	Skogsvåg	Sund	Hordaland	Norway
WF		ZMUB 001234	YES Nov 22 w picture/ note	Balaenopteridae	Balaenoptera acutorostrata	Balaenoptera	acutorostrata		Foe	05	06	1878	Skogsvåg	Sund	Hordaland	Norway
WF		ZMUB 001236	YES Nov 22 w picture/ note	Balaenopteridae	Balaenoptera acutorostrata	Balaenoptera	acutorostrata		Foe	05	06	1878	Skogsvåg	Sund	Hordaland	Norway
WF		ZMUB 001214	YES Nov 22 w picture/ note	Balaenopteridae	Balaenoptera acutorostrata	Balaenoptera	acutorostrata		Foe	18	03	1880	Skogsvåg	Sund	Hordaland	Norway
WF		ZMUB 001217	Hansahallen - assume database is correct	Balaenopteridae	Balaenoptera acutorostrata	Balaenoptera	acutorostrata		Foe	29	04	1881	Skogsvåg	Sund	Hordaland	Norway
WF		ZMUB 001217	Hansahallen - assume database is correct	Balaenopteridae	Balaenoptera acutorostrata	Balaenoptera	acutorostrata		Foe	29	04	1881	Skogsvåg	Sund	Hordaland	Norway
WF		ZMUB 001248	Hansahallen - assume database is correct	Balaenopteridae	Balaenoptera acutorostrata	Balaenoptera	acutorostrata		Foe	18	07	1881	Skogsvåg	Sund	Hordaland	Norway
WF		ZMUB 001268	YES Nov 22 w picture/ note	Balaenopteridae	Balaenoptera acutorostrata	Balaenoptera	acutorostrata		Foe	22	06	1881	Skogsvåg	Sund	Hordaland	Norway
WF		ZMUB 001242	YES Nov 22 w picture/ note	Balaenopteridae	Balaenoptera acutorostrata	Balaenoptera	acutorostrata		Foe	28	04	1883	Telavåg	Sund	Hordaland	Norway
WF		ZMUB 001243	YES Nov 22 w picture/ note	Balaenopteridae	Balaenoptera acutorostrata	Balaenoptera	acutorostrata		Foe	28	04	1883	Telavåg	Sund	Hordaland	Norway
WF		ZMUB 001274	Hansahallen - assume database is correct	Balaenopteridae	Balaenoptera borealis	Balaenoptera	borealis		Foe	16	06	1883	Sørvær	Hasvik	Finnmark	Norway
WF		ZMUB 001209	YES Nov 22 w picture/ note	Balaenidae	Megaptera novaeangliae	Megaptera	novaeangliae		Foe			1883			Finnmark	Norway
WF		ZMUB 001211	YES Nov 22 w picture/ note	Balaenidae	Megaptera novaeangliae	Megaptera	novaeangliae		Foe		07	1884	Syltefjorden	Båtsfjord	Finnmark	Norway
WF		ZMUB 001227	YES Nov 22 w picture/ note	Balaenopteridae	Balaenoptera acutorostrata	Balaenoptera	acutorostrata		Foe	24	04	1885	Skogsvåg	Sund	Hordaland	Norway
WF		ZMUB 001235	YES Nov 22 w picture/ note	Balaenopteridae	Balaenoptera acutorostrata	Balaenoptera	acutorostrata		Foe	12	05	1885	Skogsvåg	Sund	Hordaland	Norway
WF		ZMUB 001244	Hansahallen - assume database is correct	Balaenopteridae	Balaenoptera acutorostrata	Balaenoptera	acutorostrata		Foe	26	04	1885	Telavåg	Sund	Hordaland	Norway
WF		ZMUB 001249	YES Nov 22 w picture/ note	Balaenopteridae	Balaenoptera acutorostrata	Balaenoptera	acutorostrata		Foe	me	06	1885	Skogsvåg	Sund	Hordaland	Norway
WF		ZMUB 001250	YES Nov 22 w picture/ note	Balaenopteridae	Balaenoptera acutorostrata	Balaenoptera	acutorostrata		Foe	24	06	1885	Skogsvåg	Sund	Hordaland	Norway
WF		ZMUB 001338	Hansahallen - assume database is correct	Balaenopteridae	Balaenoptera acutorostrata	Balaenoptera	acutorostrata		Foe	26	09	1885	Skogsvåg	Sund	Hordaland	Norway
WF		ZMUB 001165	Hansahallen - assume database is correct	Delphinidae	Lagenorhynchus acutus	Lagenorhynchus	acutus		Foe	09	11	1885	Torskøy	Manger	Hordaland	Norway		Large pack of 1000 specimens, 200-300 were killed, skeletons and foetuses were bought by Bm, by Fridtjof nansen, conservator. Collett p 689
WF		ZMUB 001166	Hansahallen - assume database is correct	Delphinidae	Lagenorhynchus acutus	Lagenorhynchus	acutus		Foe	09	11	1885	Torskøy	Manger	Hordaland	Norway		Large pack of 1000 specimens, 200-300 were killed, skeletons and foetuses were bought by Bm, by Fridtjof nansen, conservator. Collett p 689
WF		ZMUB 001167	Hansahallen - assume database is correct	Delphinidae	Lagenorhynchus acutus	Lagenorhynchus	acutus		Foe	09	11	1885	Torskøy	Manger	Hordaland	Norway		Large pack of 1000 specimens, 200-300 were killed, skeletons and foetuses were bought by Bm, by Fridtjof nansen, conservator. Collett p 689
WF		ZMUB 001168	Hansahallen - assume database is correct	Delphinidae	Lagenorhynchus acutus	Lagenorhynchus	acutus		Foe	09	11	1885	Torskøy	Manger	Hordaland	Norway		Large pack of 1000 specimens, 200-300 were killed, skeletons and foetuses were bought by Bm, by Fridtjof nansen, conservator. Collett p 689
WF		ZMUB 001169	Hansahallen - assume database is correct	Delphinidae	Lagenorhynchus acutus	Lagenorhynchus	acutus		Foe	09	11	1885	Torskøy	Manger	Hordaland	Norway		Large pack of 1000 specimens, 200-300 were killed, skeletons and foetuses were bought by Bm, by Fridtjof nansen, conservator. Collett p 689
WF		ZMUB 001170	Hansahallen - assume database is correct	Delphinidae	Lagenorhynchus acutus	Lagenorhynchus	acutus		Foe	09	11	1885	Torskøy	Manger	Hordaland	Norway		Large pack of 1000 specimens, 200-300 were killed, skeletons and foetuses were bought by Bm, by Fridtjof nansen, conservator. Collett p 689
WF		ZMUB 001171	YES Nov 22 w picture/ note	Delphinidae	Lagenorhynchus acutus	Lagenorhynchus	acutus		Foe	09	11	1885	Torskøy	Manger	Hordaland	Norway		Large pack of 1000 specimens, 200-300 were killed, skeletons and foetuses were bought by Bm, by Fridtjof nansen, conservator. Collett p 689
WF		ZMUB 001172	YES Nov 22 w picture/ note	Delphinidae	Lagenorhynchus acutus	Lagenorhynchus	acutus		Foe	09	11	1885	Torskøy	Manger	Hordaland	Norway		Large pack of 1000 specimens, 200-300 were killed, skeletons and foetuses were bought by Bm, by Fridtjof nansen, conservator. Collett p 689
WF		ZMUB 001173	YES Nov 22 w picture/ note	Delphinidae	Lagenorhynchus acutus	Lagenorhynchus	acutus		Foe	09	11	1885	Torskøy	Manger	Hordaland	Norway		Large pack of 1000 specimens, 200-300 were killed, skeletons and foetuses were bought by Bm, by Fridtjof nansen, conservator. Collett p 689
WF		ZMUB 001174	Hansahallen - assume database is correct	Delphinidae	Lagenorhynchus acutus	Lagenorhynchus	acutus		Foe	09	11	1885	Torskøy	Manger	Hordaland	Norway		Large pack of 1000 specimens, 200-300 were killed, skeletons and foetuses were bought by Bm, by Fridtjof nansen, conservator. Collett p 689
WF		ZMUB 001175	Hansahallen - assume database is correct	Delphinidae	Lagenorhynchus acutus	Lagenorhynchus	acutus		Foe	09	11	1885	Torskøy	Manger	Hordaland	Norway		Large pack of 1000 specimens, 200-300 were killed, skeletons and foetuses were bought by Bm, by Fridtjof nansen, conservator. Collett p 689
WF		ZMUB 001176	Hansahallen - assume database is correct	Delphinidae	Lagenorhynchus acutus	Lagenorhynchus	acutus		Foe	09	11	1885	Torskøy	Manger	Hordaland	Norway		Large pack of 1000 specimens, 200-300 were killed, skeletons and foetuses were bought by Bm, by Fridtjof nansen, conservator. Collett p 689
WF		ZMUB 001177	Hansahallen - assume database is correct	Delphinidae	Lagenorhynchus acutus	Lagenorhynchus	acutus		Foe	09	11	1885	Torskøy	Manger	Hordaland	Norway		Large pack of 1000 specimens, 200-300 were killed, skeletons and foetuses were bought by Bm, by Fridtjof nansen, conservator. Collett p 689
WF		ZMUB 001178	Hansahallen - assume database is correct	Delphinidae	Lagenorhynchus acutus	Lagenorhynchus	acutus		Foe	09	11	1885	Torskøy	Manger	Hordaland	Norway		Large pack of 1000 specimens, 200-300 were killed, skeletons and foetuses were bought by Bm, by Fridtjof nansen, conservator. Collett p 689
WF		ZMUB 001179	Hansahallen - assume database is correct	Delphinidae	Lagenorhynchus acutus	Lagenorhynchus	acutus		Foe	09	11	1885	Torskøy	Manger	Hordaland	Norway		Large pack of 1000 specimens, 200-300 were killed, skeletons and foetuses were bought by Bm, by Fridtjof nansen, conservator. Collett p 689
WF		ZMUB 001180	Hansahallen - assume database is correct	Delphinidae	Lagenorhynchus acutus	Lagenorhynchus	acutus		Foe	09	11	1885	Torskøy	Manger	Hordaland	Norway		Large pack of 1000 specimens, 200-300 were killed, skeletons and foetuses were bought by Bm, by Fridtjof nansen, conservator. Collett p 689
WF		ZMUB 001181	Hansahallen - assume database is correct	Delphinidae	Lagenorhynchus acutus	Lagenorhynchus	acutus		Foe	09	11	1885	Torskøy	Manger	Hordaland	Norway		Large pack of 1000 specimens, 200-300 were killed, skeletons and foetuses were bought by Bm, by Fridtjof nansen, conservator. Collett p 689
WF		ZMUB 001275	Hansahallen - assume database is correct	Balaenopteridae	Balaenoptera borealis	Balaenoptera	borealis		Foe			1885	Syltefjord	Båtsfjord	Finnmark	Norway
WF		ZMUB 001340	Hansahallen - assume database is correct	Balaenopteridae	Balaenoptera musculus	Balaenoptera	musculus		Foe			1885			Finnmark	Norway
WF		ZMUB 001282	Hansahallen - assume database is correct	Delphinidae	Orcinus orca	Orcinus	orca		Foe		02	1885	Bildøybakken	Fjell	Hordaland	Norway
WF		ZMUB 001283	Hansahallen - assume database is correct	Delphinidae	Orcinus orca	Orcinus	orca		Foe		02	1885	Bildøybakken	Fjell	Hordaland	Norway
WF		ZMUB 001284	Hansahallen - assume database is correct	Delphinidae	Orcinus orca	Orcinus	orca		Foe		02	1885	Bildøybakken	Fjell	Hordaland	Norway
WF		ZMUB 001285	YES Nov 22 w picture/ note	Delphinidae	Orcinus orca	Orcinus	orca		Foe		02	1885	Bildøybakken	Fjell	Hordaland	Norway
WF		ZMUB 001286	Hansahallen - assume database is correct	Delphinidae	Orcinus orca	Orcinus	orca		Foe		02	1885	Bildøybakken	Fjell	Hordaland	Norway
WF		ZMUB 001287	Hansahallen - assume database is correct	Delphinidae	Orcinus orca	Orcinus	orca		Foe		02	1885	Bildøybakken	Fjell	Hordaland	Norway
WF		ZMUB 001288	Hansahallen - assume database is correct	Delphinidae	Orcinus orca	Orcinus	orca		Foe		02	1885	Bildøybakken	Fjell	Hordaland	Norway
WF		ZMUB 001289	Hansahallen - assume database is correct	Delphinidae	Orcinus orca	Orcinus	orca		Foe		02	1885	Bildøybakken	Fjell	Hordaland	Norway
WF		ZMUB 001290	Hansahallen - assume database is correct	Delphinidae	Orcinus orca	Orcinus	orca		Foe		02	1885	Bildøybakken	Fjell	Hordaland	Norway
WF		ZMUB 001291	Hansahallen - assume database is correct	Delphinidae	Orcinus orca	Orcinus	orca		Foe		02	1885	Bildøybakken	Fjell	Hordaland	Norway
WF		ZMUB 001292	Hansahallen - assume database is correct	Delphinidae	Orcinus orca	Orcinus	orca		Foe		02	1885	Bildøybakken	Fjell	Hordaland	Norway
WF		ZMUB 001293	Hansahallen - assume database is correct	Delphinidae	Orcinus orca	Orcinus	orca		Foe		02	1885	Bildøybakken	Fjell	Hordaland	Norway
WF		ZMUB 001311	Hansahallen - assume database is correct	Phocoenidae	Phocoena phocoena	Phocoena	phocoena		Foe	03	05	1885	Hjeltefjorden		Hordaland	Norway
WF		ZMUB 001315	Hansahallen - assume database is correct	Phocoenidae	Phocoena phocoena	Phocoena	phocoena		Foe	15	04	1885	Bildøy	Fjell	Hordaland	Norway
WF		ZMUB 001212	Hansahallen - assume database is correct	Balaenopteridae	Balaenoptera physalus	Balaenoptera	physalus		Foe			1885	Syltefjord	Båtsfjord	Finnmark	Norway
WF		ZMUB 001231	YES Nov 22 w picture/ note	Balaenopteridae	Balaenoptera acutorostrata	Balaenoptera	acutorostrata		Foe	13	04	1886	Skogsvåg	Sund	Hordaland	Norway
WF		ZMUB 001245	YES Nov 22 w picture/ note	Balaenopteridae	Balaenoptera acutorostrata	Balaenoptera	acutorostrata		Foe	17	05	1886	Telavåg	Sund	Hordaland	Norway
WF		ZMUB 001327	Hansahallen - assume database is correct	Balaenopteridae	Balaenoptera acutorostrata	Balaenoptera	acutorostrata		Foe	09	11	1886	Skogsvåg	Sund	Hordaland	Norway
WF		ZMUB 001337	Hansahallen - assume database is correct	Balaenopteridae	Balaenoptera acutorostrata	Balaenoptera	acutorostrata		Foe	04	08	1886	Skogsvåg	Sund	Hordaland	Norway
WF		ZMUB 001210	YES Nov 22 w picture/ note	Balaenidae	Megaptera novaeangliae	Megaptera	novaeangliae		Foe		08	1886	Syltefjorden	Båtsfjord	Finnmark	Norway
WF		ZMUB 001295	Hansahallen - assume database is correct	Delphinidae	Orcinus orca	Orcinus	orca		Foe	18	02	1886	Herdla	Askøy	Hordaland	Norway
WF		ZMUB 001296	Hansahallen - assume database is correct	Delphinidae	Orcinus orca	Orcinus	orca		Foe	18	02	1886	Herdla	Askøy	Hordaland	Norway
WF		ZMUB 001297	Hansahallen - assume database is correct	Delphinidae	Orcinus orca	Orcinus	orca		Foe	18	02	1886	Herdla	Askøy	Hordaland	Norway
WF		ZMUB 001213	Hansahallen - assume database is correct	Balaenopteridae	Balaenoptera physalus	Balaenoptera	physalus		Foe	me	07	1886	Syltefjord	Båtsfjord	Finnmark	Norway
WF		ZMUB 001308	Hansahallen - assume database is correct	Delphinidae	Lagenorhynchus albirostris	Lagenorhynchus	albirostris		Foe	13	05	1887	Bildøy	Fjell	Hordaland	Norway		Mindre steng Bildø, mange ex kjøpt av museet. Kilde Collett p 681	K
WF		ZMUB 001309	Hansahallen - assume database is correct	Delphinidae	Lagenorhynchus albirostris	Lagenorhynchus	albirostris		Foe	13	05	1887	Bildøy	Fjell	Hordaland	Norway		Mindre steng Bildø, mange ex kjøpt av museet. Kilde Collett p 681	K
WF		ZMUB 001261	YES Nov 22 w picture/ note	Balaenopteridae	Balaenoptera acutorostrata	Balaenoptera	acutorostrata		Foe	21	07	1887	Skogsvåg	Sund	Hordaland	Norway
WF		ZMUB 001336	Hansahallen - assume database is correct	Balaenopteridae	Balaenoptera acutorostrata	Balaenoptera	acutorostrata		Foe	29	08	1887	Skogsvåg	Sund	Hordaland	Norway
WF		ZMUB 001301	Hansahallen - assume database is correct	Delphinidae	Orcinus orca	Orcinus	orca		Foe	21	11	1887	Bildøybakken	Fjell	Hordaland	Norway
WF		ZMUB 001313	Hansahallen - assume database is correct	Phocoenidae	Phocoena phocoena	Phocoena	phocoena		Juv	11	06	1887	Solheimsvågen	Bergen	Hordaland	Norway
WF		ZMUB 001223	Hansahallen - assume database is correct	Balaenopteridae	Balaenoptera acutorostrata	Balaenoptera	acutorostrata		Foe	07	06	1888	Skogsvåg	Sund	Hordaland	Norway
WF		ZMUB 001232	YES Nov 22 w picture/ note	Balaenopteridae	Balaenoptera acutorostrata	Balaenoptera	acutorostrata		Foe	12	05	1888	Skogsvåg	Sund	Hordaland	Norway
WF		ZMUB 001239	YES Nov 22 w picture/ note	Balaenopteridae	Balaenoptera acutorostrata	Balaenoptera	acutorostrata		Foe	03	07	1888	Skogsvåg	Sund	Hordaland	Norway
WF		ZMUB 001240	YES Nov 22 w picture/ note	Balaenopteridae	Balaenoptera acutorostrata	Balaenoptera	acutorostrata		Foe	19	05	1888	Skogsvåg	Sund	Hordaland	Norway
WF		ZMUB 001251	YES Nov 22 w picture/ note	Balaenopteridae	Balaenoptera acutorostrata	Balaenoptera	acutorostrata		Foe	15	06	1888	Skogsvåg	Sund	Hordaland	Norway
WF		ZMUB 001262	YES Nov 22 w picture/ note	Balaenopteridae	Balaenoptera acutorostrata	Balaenoptera	acutorostrata		Foe	17	05	1888	Skogsvåg	Sund	Hordaland	Norway
WF		ZMUB 001310	Hansahallen - assume database is correct	Phocoenidae	Phocoena phocoena	Phocoena	phocoena		Foe	19	04	1888	Kobbeltvedt	Bergen	Hordaland	Norway
WF		ZMUB 001314	Hansahallen - assume database is correct	Phocoenidae	Phocoena phocoena	Phocoena	phocoena		Foe	08	06	1888	Hjeltefjorden		Hordaland	Norway
WF		ZMUB 001322	Hansahallen - assume database is correct	Phocoenidae	Phocoena phocoena	Phocoena	phocoena		Foe	03	05	1888	Hjeltefjorden		Hordaland	Norway
WF		ZMUB 001140	Hansahallen - assume database is correct	Ziphiidae	Hyperoodon ampullatus	Hyperoodon	ampullatus		Foe			1889	Ishavet			Arctic Ocean
WF		ZMUB 001141	YES Nov 22 w picture/ note	Ziphiidae	Hyperoodon ampullatus	Hyperoodon	ampullatus		Foe			1889	Ishavet			Arctic Ocean
WF		ZMUB 001348	Hansahallen - assume database is correct	Delphinidae	Lagenorhynchus albirostris	Lagenorhynchus	albirostris		Foe	15	04	1889	Bildøy	Fjell	Hordaland	Norway		Mindre steng Bildø, mange ex kjøpt av museet. Kilde Collett p 681	K
WF		ZMUB 001224	YES Nov 22 w picture/ note	Balaenopteridae	Balaenoptera acutorostrata	Balaenoptera	acutorostrata		Foe	24	06	1889	Skogsvåg	Sund	Hordaland	Norway
WF		ZMUB 001225	YES Nov 22 w picture/ note	Balaenopteridae	Balaenoptera acutorostrata	Balaenoptera	acutorostrata		Foe	07	05	1889	Skogsvåg	Sund	Hordaland	Norway
WF		ZMUB 001253	Hansahallen - assume database is correct	Balaenopteridae	Balaenoptera acutorostrata	Balaenoptera	acutorostrata		Foe	10	06	1889	Skogsvåg	Sund	Hordaland	Norway
WF		ZMUB 001272	YES Nov 22 w picture/ note	Balaenopteridae	Balaenoptera acutorostrata	Balaenoptera	acutorostrata		Foe	27	04	1889	Telavåg	Sund	Hordaland	Norway
WF		ZMUB 001147	Hansahallen - assume database is correct	Phocoenidae	Phocoena phocoena	Phocoena	phocoena		Foe	12	10	1889	Hjeltefjorden		Hordaland	Norway
WF		ZMUB 001320	Hansahallen - assume database is correct	Phocoenidae	Phocoena phocoena	Phocoena	phocoena		Foe	29	04	1889	Hjeltefjorden		Hordaland	Norway
WF		ZMUB 001323	Hansahallen - assume database is correct	Phocoenidae	Phocoena phocoena	Phocoena	phocoena		Juv	10	05	1889	Lågøen		Hordaland	Norway
WF		ZMUB 001324	Hansahallen - assume database is correct	Phocoenidae	Phocoena phocoena	Phocoena	phocoena		Foe	26	04	1889	Hjeltefjorden		Hordaland	Norway
WF		ZMUB 001325	Hansahallen - assume database is correct	Phocoenidae	Phocoena phocoena	Phocoena	phocoena		Foe	pr	05	1889	Herdla	Askøy	Hordaland	Norway
WF		ZMUB 001216	YES Nov 22 w picture/ note	Balaenopteridae	Balaenoptera acutorostrata	Balaenoptera	acutorostrata		Foe	27	05	1890	Skogsvåg	Sund	Hordaland	Norway
WF		ZMUB 001226	YES Nov 22 w picture/ note	Balaenopteridae	Balaenoptera acutorostrata	Balaenoptera	acutorostrata		Foe	16	05	1890	Skogsvåg	Sund	Hordaland	Norway
WF		ZMUB 001237	YES Nov 22 w picture/ note	Balaenopteridae	Balaenoptera acutorostrata	Balaenoptera	acutorostrata		Foe	01	06	1890	Skogsvåg	Sund	Hordaland	Norway
WF		ZMUB 006328	Hansahallen - assume database is correct	Ziphiidae	Hyperoodon ampullatus	Hyperoodon	ampullatus		Juv	25	07	1890	Kristiansuns N	Kristiansund	Møre og Romsdal	Norway
WF		ZMUB 001154	Hansahallen - assume database is correct	Phocoenidae	Phocoena phocoena	Phocoena	phocoena		Foe	18	03	1890	Hjeltefjord		Hordaland	Norway
WF		ZMUB 001157	YES Nov 22 w picture/ note	Phocoenidae	Phocoena phocoena	Phocoena	phocoena		Foe	22	03	1890	Hjeltefjorden		Hordaland	Norway
WF		ZMUB 001158	Hansahallen - assume database is correct	Phocoenidae	Phocoena phocoena	Phocoena	phocoena		Foe	16	03	1890	Hjeltefjord		Hordaland	Norway
WF		ZMUB 001228	YES Nov 22 w picture/ note	Balaenopteridae	Balaenoptera acutorostrata	Balaenoptera	acutorostrata		Foe	14	05	1891	Skogsvåg	Sund	Hordaland	Norway
WF		ZMUB 001294	Hansahallen - assume database is correct	Delphinidae	Orcinus orca	Orcinus	orca		Foe	29	04	1892	Bildøybakken	Fjell	Hordaland	Norway
WF		BM 000036	Hansahallen - assume database is correct	Phocoenidae	Phocoena phocoena	Phocoena	phocoena		Foe	14	10	1893	Hjeltefjord		Hordaland	Norway
WF		BM 000561	Hansahallen - assume database is correct	Phocoenidae	Phocoena phocoena	Phocoena	phocoena		Foe	28	09	1894	Hindø			Norway
WF		ZMUB 001086	Hansahallen - assume database is correct	Balaenopteridae	Balaenoptera acutorostrata	Balaenoptera	acutorostrata		Foe	11	06	1895	Dalsland, Hjeltefj.		Hordaland	Norway
WF		ZMUB 001093	Hansahallen - assume database is correct	Balaenopteridae	Balaenoptera acutorostrata	Balaenoptera	acutorostrata		Foe	26	01	1895	Skogsvåg	Sund	Hordaland	Norway
WF		ZMUB 001188	YES Nov 22 w picture/ note	Phocoenidae	Phocoena phocoena	Phocoena	phocoena		Foe	19	10	1895	Geitanger	Fjell	Hordaland	Norway
WF		ZMUB 001342	Hansahallen - assume database is correct	Phocoenidae	Phocoena phocoena	Phocoena	phocoena		Foe	31	10	1895	Brattholmen		Hordaland	Norway
WF		ZMUB 001364	YES Nov 22 w picture/ note	Balaenopteridae	Balaenoptera acutorostrata	Balaenoptera	acutorostrata		Foe	30	06	1896	Skogsvåg	Sund	Hordaland	Norway
WF		ZMUB 001372	Hansahallen - assume database is correct	Phocoenidae	Phocoena phocoena	Phocoena	phocoena		Foe	24	10	1896	Hjeltefjorden		Hordaland	Norway
WF		ZMUB 001373	Hansahallen - assume database is correct	Phocoenidae	Phocoena phocoena	Phocoena	phocoena		Foe	24	10	1896	Hjeltefjorden		Hordaland	Norway
WF		ZMUB 001451	YES Nov 22 w picture/ note	Balaenopteridae	Balaenoptera acutorostrata	Balaenoptera	acutorostrata		Foe	24	05	1897	Skogsvåg	Sund	Hordaland	Norway
WF		ZMUB 001461	Hansahallen - assume database is correct	Phocoenidae	Phocoena phocoena	Phocoena	phocoena		Foe	08	04	1897	Hjeltefjord		Hordaland	Norway
WF		ZMUB 001499	YES Nov 22 w picture/ note	Balaenopteridae	Balaenoptera acutorostrata	Balaenoptera	acutorostrata		Foe	27	04	1899	Skogsvåg	Sund	Hordaland	Norway
WF		ZMUB 001516	YES Nov 22 w picture/ note	Balaenopteridae	Balaenoptera acutorostrata	Balaenoptera	acutorostrata		Foe	05	05	1900	Skogsvåg	Sund	Hordaland	Norway
WF		ZMUB 001552	Hansahallen - assume database is correct	Phocoenidae	Phocoena phocoena	Phocoena	phocoena		Foe	30	10	1901	Hjeltefjorden		Hordaland	Norway
WF		ZMUB 001553	Hansahallen - assume database is correct	Phocoenidae	Phocoena phocoena	Phocoena	phocoena		Foe	01	11	1901	Hjeltefjorden		Hordaland	Norway
WF		ZMUB 001557	YES Nov 22 w picture/ note	Balaenopteridae	Balaenoptera acutorostrata	Balaenoptera	acutorostrata		Foe	10	04	1902	Skogsvåg	Sund	Hordaland	Norway
WF		ZMUB 001560	YES Nov 22 w picture/ note	Balaenopteridae	Balaenoptera acutorostrata	Balaenoptera	acutorostrata		Foe	30	04	1902	Skogsvåg	Sund	Hordaland	Norway
WF		ZMUB 001590	YES Nov 22 w picture/ note	Balaenopteridae	Balaenoptera acutorostrata	Balaenoptera	acutorostrata		Foe	22	05	1903	Skogsvåg	Sund	Hordaland	Norway
WF		ZMUB 001592	Hansahallen - assume database is correct	Phocoenidae	Phocoena phocoena	Phocoena	phocoena		Foe	18	08	1903	Hjeltefjord		Hordaland	Norway
WF		ZMUB 001594	Hansahallen - assume database is correct	Phocoenidae	Phocoena phocoena	Phocoena	phocoena		Foe	29	09	1903	Hjeltefjord		Hordaland	Norway
WF		ZMUB 001595	Hansahallen - assume database is correct	Phocoenidae	Phocoena phocoena	Phocoena	phocoena		Foe	29	09	1903	Hjeltefjorden		Hordaland	Norway
WF		ZMUB 001621	YES Nov 22 w picture/ note	Balaenopteridae	Balaenoptera acutorostrata	Balaenoptera	acutorostrata		Foe	23	04	1904	Skogsvåg	Sund	Hordaland	Norway
WF		ZMUB 001622	Hansahallen - assume database is correct	Balaenopteridae	Balaenoptera acutorostrata	Balaenoptera	acutorostrata		Foe	08	07	1904	Skogsvåg	Sund	Hordaland	Norway
WF		ZMUB 001605	Hansahallen - assume database is correct	Delphinidae	Orcinus orca	Orcinus	orca		Foe	15	10	1904	Bildøybakken	Fjell	Hordaland	Norway
WF		ZMUB 001606	Hansahallen - assume database is correct	Delphinidae	Orcinus orca	Orcinus	orca		Foe	15	10	1904	Bildøybakken	Fjell	Hordaland	Norway
WF		ZMUB 003133	Hansahallen - assume database is correct	Delphinidae	Orcinus orca	Orcinus	orca		Foe	18	01	1904	Bildøystrømmen	Fjell	Hordaland	Norway
WF		ZMUB 001629	Hansahallen - assume database is correct	Phocoenidae	Phocoena phocoena	Phocoena	phocoena		Foe	26	10	1904	Hjeltefjord		Hordaland	Norway
WF		ZMUB 001631	Hansahallen - assume database is correct	Phocoenidae	Phocoena phocoena	Phocoena	phocoena		Foe	11	11	1904	Stolmen	Austevoll	Hordaland	Norway
WF		ZMUB 001632	Hansahallen - assume database is correct	Phocoenidae	Phocoena phocoena	Phocoena	phocoena		Foe	14	12	1904	Hjeltefjorden		Hordaland	Norway
WF		ZMUB 003130	Hansahallen - assume database is correct	Balaenopteridae	Balaenoptera acutorostrata	Balaenoptera	acutorostrata		Foe	02	09	1905	Skogsvåg	Sund	Hordaland	Norway
WF		ZMUB 001658	Hansahallen - assume database is correct	Phocoenidae	Phocoena phocoena	Phocoena	phocoena		Foe	22	10	1905	Hjeltefjord		Hordaland	Norway
WF		ZMUB 001665	YES Nov 22 w picture/ note	Balaenopteridae	Balaenoptera acutorostrata	Balaenoptera	acutorostrata		Foe	17	04	1906	Skogsvåg	Sund	Hordaland	Norway
WF		ZMUB 002087	YES Nov 22 w picture/ note	Delphinidae	Lagenorhynchus acutus	Lagenorhynchus	acutus		Foe	10	11	1907	Bildøybakken	Fjell	Hordaland	Norway
WF		ZMUB 002093	YES Nov 22 w picture/ note	Delphinidae	Lagenorhynchus acutus	Lagenorhynchus	acutus		Foe	10	11	1907	Bildøybakken	Fjell	Hordaland	Norway
WF		ZMUB 002095	YES Nov 22 w picture/ note	Delphinidae	Lagenorhynchus acutus	Lagenorhynchus	acutus		Foe	10	11	1907	Bildøybakken	Fjell	Hordaland	Norway
WF		ZMUB 002099	Hansahallen - assume database is correct	Delphinidae	Lagenorhynchus acutus	Lagenorhynchus	acutus		Foe	10	11	1907	Bildøybakken	Fjell	Hordaland	Norway
WF		ZMUB 002100	YES Nov 22 w picture/ note	Delphinidae	Lagenorhynchus acutus	Lagenorhynchus	acutus		Foe	10	11	1907	Bildøybakken	Fjell	Hordaland	Norway
WF		ZMUB 002102	YES Nov 22 w picture/ note	Delphinidae	Lagenorhynchus acutus	Lagenorhynchus	acutus		Foe	10	11	1907	Bildøybakken	Fjell	Hordaland	Norway
WF		ZMUB 002103	Hansahallen - assume database is correct	Delphinidae	Lagenorhynchus acutus	Lagenorhynchus	acutus		Foe	10	11	1907	Bildøybakken	Fjell	Hordaland	Norway
WF		ZMUB 001717	YES Nov 22 w picture/ note	Phocoenidae	Phocoena phocoena	Phocoena	phocoena		Foe	08	10	1907	Hjeltefjorden		Hordaland	Norway
WF		ZMUB 001946	Hansahallen - assume database is correct	Phocoenidae	Phocoena phocoena	Phocoena	phocoena		Foe	19	09	1908	Hjeltefjorden		Hordaland	Norway
WF		ZMUB 002073	Hansahallen - assume database is correct	Phocoenidae	Phocoena phocoena	Phocoena	phocoena		Foe	17	11	1911	Hjeltefjorden		Hordaland	Norway
WF		ZMUB 002154	YES Nov 22 w picture/ note	Balaenopteridae	Balaenoptera acutorostrata	Balaenoptera	acutorostrata		Foe	04	06	1912	Skogsvåg	Sund	Hordaland	Norway
WF		ZMUB 003274	Hansahallen - assume database is correct	Balaenidae	Megaptera novaeangliae	Megaptera	novaeangliae		Foe			1913	Syd-Georgia			South Georgia
WF		ZMUB 003275	Hansahallen - assume database is correct	Balaenidae	Megaptera novaeangliae	Megaptera	novaeangliae		Foe			1913	Syd-Georgia			South Georgia
WF		ZMUB 002423	Hansahallen - assume database is correct	Phocoenidae	Phocoena phocoena	Phocoena	phocoena		Foe	18	09	1914	Bergen	Bergen	Hordaland	Norway
WF		ZMUB 002462	Hansahallen - assume database is correct	Phocoenidae	Phocoena phocoena	Phocoena	phocoena		Foe	21	11	1914	Bergen	Bergen	Hordaland	Norway
WF		005387	YES Nov 22 w picture/ note	Physeteridae	Physeter catodon	Physeter	catodon		Foe			1914	Durban			South Africa	Leg.: I. Iversen
WF		ZMUB 006329	Hansahallen - assume database is correct	Phocoenidae	Phocoena phocoena	Phocoena	phocoena		Foe	08	05	1915	Bergen torg		Hordaland	Norway
WF		ZMUB 006324	Hansahallen - assume database is correct	Phocoenidae	Phocoena phocoena	Phocoena	phocoena		Foe	02	05	1916
WF		ZMUB 002998	YES Nov 22 w picture/ note	Balaenopteridae	Balaenoptera acutorostrata	Balaenoptera	acutorostrata		Foe	01	05	1918	Skogsvåg	Sund	Hordaland	Norway
WF		ZMUB 002990	Hansahallen - assume database is correct	Balaenopteridae	Balaenoptera physalus	Balaenoptera	physalus		Foe	18	03	1918	Røver	Haugesund	Rogaland	Norway
WF		ZMUB 002993	Hansahallen - assume database is correct	Balaenopteridae	Balaenoptera physalus	Balaenoptera	physalus		Foe	03	04	1918	Blomvåg	Øygarden	Hordaland	Norway
WF		ZMUB 003084	Hansahallen - assume database is correct	Phocoenidae	Phocoena phocoena	Phocoena	phocoena		Foe	20	09	1919	Hjeltefjorden		Hordaland	Norway
WF		ZMUB 004277	Hansahallen - assume database is correct	Monodontidae	Delphinapterus leucas	Delphinapterus	leucas		Foe		07	1935	Hornsund		Spitsbergen	Svalbard
WF		ZMUB 004278	Hansahallen - assume database is correct	Monodontidae	Delphinapterus leucas	Delphinapterus	leucas		Foe		07	1935	Hornsund		Spitsbergen	Svalbard
WF		ZMUB 004284	YES Nov 22 w picture/ note	Balaenopteridae	Balaenoptera acutorostrata	Balaenoptera	acutorostrata		Foe	15	04	1936	Skogsvåg	Sund	Hordaland	Norway
WF		ZMUB 004349	Hansahallen - assume database is correct	Phocoenidae	Phocoena phocoena	Phocoena	phocoena		Foe	25	09	1939	Knappskog	Fjell	Hordaland	Norway
WF		ZMUB 004387	Hansahallen - assume database is correct	Phocoenidae	Phocoena phocoena	Phocoena	phocoena		Foe	26	08	1942	Knappskog	Fjell	Hordaland	Norway
WF		ZMUB 004402	YES Nov 22 w picture/ note	Balaenopteridae	Balaenoptera acutorostrata	Balaenoptera	acutorostrata		Foe	25	05	1943	Vestlandet [Blomvåg]			Norway	"Fra hvalstasjonen Blomvåg"
WF		ZMUB 004667	YES Nov 22 w picture/ note	Balaenopteridae	Balaenoptera musculus	Balaenoptera	musculus		Foe		11	1948	Syd-Georgia			South Georgia	T. Sparre
WF		ZMUB 004665	YES Nov 22 w picture/ note	Balaenidae	Megaptera novaeangliae	Megaptera	novaeangliae		Foe		11	1948	Syd-Georgia			South Georgia	T. Sparre
WF		ZMUB 001218	YES Nov 22 w picture/ note	Balaenopteridae	Balaenoptera acutorostrata	Balaenoptera	acutorostrata		Foe				Skogsvåg	Sund	Hordaland	Norway
WF		ZMUB 001219	YES Nov 22 w picture/ note	Balaenopteridae	Balaenoptera acutorostrata	Balaenoptera	acutorostrata		Foe				Skogsvåg	Sund	Hordaland	Norway
WF		ZMUB 001220	YES Nov 22 w picture/ note	Balaenopteridae	Balaenoptera acutorostrata	Balaenoptera	acutorostrata		Foe				Skogsvåg	Sund	Hordaland	Norway
WF		ZMUB 001233	YES Nov 22 w picture/ note	Balaenopteridae	Balaenoptera acutorostrata	Balaenoptera	acutorostrata		Foe				Skogsvåg	Sund	Hordaland	Norway
WF		ZMUB 001238	YES Nov 22 w picture/ note	Balaenopteridae	Balaenoptera acutorostrata	Balaenoptera	acutorostrata		Foe				Skogsvåg	Sund	Hordaland	Norway
WF		ZMUB 001241	YES Nov 22 w picture/ note	Balaenopteridae	Balaenoptera acutorostrata	Balaenoptera	acutorostrata		Foe				Skogsvåg	Sund	Hordaland	Norway
WF		ZMUB 001247	Hansahallen - assume database is correct	Balaenopteridae	Balaenoptera acutorostrata	Balaenoptera	acutorostrata		Foe				Skogsvåg	Sund	Hordaland	Norway
WF		ZMUB 001257	Hansahallen - assume database is correct	Balaenopteridae	Balaenoptera acutorostrata	Balaenoptera	acutorostrata		Foe				Skogsvåg	Sund	Hordaland	Norway
WF		ZMUB 001258	Hansahallen - assume database is correct	Balaenopteridae	Balaenoptera acutorostrata	Balaenoptera	acutorostrata		Foe				Skogsvåg	Sund	Hordaland	Norway
WF		ZMUB 001259	Hansahallen - assume database is correct	Balaenopteridae	Balaenoptera acutorostrata	Balaenoptera	acutorostrata		Foe				Skogsvåg	Sund	Hordaland	Norway
WF		ZMUB 001264	YES Nov 22 w picture/ note	Balaenopteridae	Balaenoptera acutorostrata	Balaenoptera	acutorostrata		Foe				Skogsvåg	Sund	Hordaland	Norway
WF		ZMUB 001303	Hansahallen - assume database is correct	Delphinidae	Lagenorhynchus acutus	Lagenorhynchus	acutus		Foe				Bergen	Bergen	Hordaland	Norway
WF		ZMUB 001304	Hansahallen - assume database is correct	Delphinidae	Lagenorhynchus acutus	Lagenorhynchus	acutus		Foe				Bergen	Bergen	Hordaland	Norway
WF		ZMUB 001305	YES Nov 22 w picture/ note	Delphinidae	Lagenorhynchus acutus	Lagenorhynchus	acutus		Foe				Bergen	Bergen	Hordaland	Norway
WF		ZMUB 001306	Hansahallen - assume database is correct	Delphinidae	Lagenorhynchus acutus	Lagenorhynchus	acutus		Foe				Bergen	Bergen	Hordaland	Norway
WF		ZMUB 001307	Hansahallen - assume database is correct	Delphinidae	Lagenorhynchus acutus	Lagenorhynchus	acutus		Foe				Bergen	Bergen	Hordaland	Norway
WF		ZMUB 001303	Hansahallen - assume database is correct	Delphinidae	Orcinus orca	Orcinus	orca		Foe				Bergen	Bergen	Hordaland	Norway
WF		ZMUB 001150	Hansahallen - assume database is correct	Phocoenidae	Phocoena phocoena	Phocoena	phocoena		Foe				Hjeltefjorden		Hordaland	Norway
WF		ZMUB 001319	Hansahallen - assume database is correct	Phocoenidae	Phocoena phocoena	Phocoena	phocoena		Foe				Bergen	Bergen	Hordaland	Norway
WF		ZMUB 003000	Hansahallen - assume database is correct	Balaenopteridae	Balaenoptera physalus	Balaenoptera	physalus		Foe						Hordaland	Norway
WF		ZMUB 003129	Hansahallen - assume database is correct	Balaenopteridae	Balaenoptera acutorostrata	Balaenoptera	acutorostrata		Foe
WF		ZMUB 003139	Hansahallen - assume database is correct	Balaenopteridae	Balaenoptera acutorostrata	Balaenoptera	acutorostrata		Foe
WF		ZMUB 003140	Hansahallen - assume database is correct	Balaenopteridae	Balaenoptera acutorostrata	Balaenoptera	acutorostrata		Foe
WF		ZMUB 003134	Hansahallen - assume database is correct	Phocoenidae	Phocoena phocoena	Phocoena	phocoena		Foe
WF		ZMUB 003135	Hansahallen - assume database is correct	Phocoenidae	Phocoena phocoena	Phocoena	phocoena		Foe
WF		ZMUB 003136	Hansahallen - assume database is correct	Phocoenidae	Phocoena phocoena	Phocoena	phocoena		Foe
WF		ZMUB 003137	Hansahallen - assume database is correct	Phocoenidae	Phocoena phocoena	Phocoena	phocoena		Foe
WF		ZMUB 001143	YES Nov 22 w picture/ note	Delphinidae	Delphinus delphis	Delphinus	delphis		Foe							Arctic Ocean	Gregers Thomsen
WF		ZMUB 001142	YES Nov 22 w picture/ note	Delphinidae	Delphinus delphis	Delphinus	delphis		Foe							Arctic Ocean
WF		ZMUB 001130	Hansahallen - assume database is correct	Monodontidae	Delphinapterus leucas	Delphinapterus	leucas		Foe						Spitsbergen	Svalbard
WF		ZMUB 001131	Hansahallen - assume database is correct	Monodontidae	Delphinapterus leucas	Delphinapterus	leucas		Foe						Spitsbergen	Svalbard
WF		ZMUB 001137	Hansahallen - assume database is correct	Monodontidae	Delphinapterus leucas	Delphinapterus	leucas		Foe						Spitsbergen	Svalbard
WF		ZMUB 001138	Hansahallen - assume database is correct	Monodontidae	Delphinapterus leucas	Delphinapterus	leucas		Foe						Spitsbergen	Svalbard
WF		ZMUB 001139	YES Nov 22 w picture/ note	Monodontidae	Delphinapterus leucas	Delphinapterus	leucas		Foe						Spitsbergen	Svalbard
WF		ZMUB 001162	Hansahallen - assume database is correct	Monodontidae	Delphinapterus leucas	Delphinapterus	leucas		Foe						Spitsbergen	Svalbard
WF		ZMUB 001222	YES Nov 22 w picture/ note	Balaenopteridae	Balaenoptera acutorostrata	Balaenoptera	acutorostrata	f	Foe	03	06	1881	Skogsvåg	Sund	Hordaland	Norway
WF		ZMUB 001163	Hansahallen - assume database is correct	Delphinidae	Lagenorhynchus acutus	Lagenorhynchus	acutus	f	Foe		12	1884		Fjell	Hordaland	Norway
WF		ZMUB 001164	YES Nov 22 w picture/ note	Delphinidae	Lagenorhynchus acutus	Lagenorhynchus	acutus	f	Foe	9	11	1884	Torskøy	Manger	Hordaland	Norway
WF		ZMUB 001282	YES Nov 22 w picture/ note	Delphinidae	Orcinus orca	Orcinus	orca	f	Foe		02	1885	Bildøybakken	Fjell	Hordaland	Norway
WF		ZMUB 001149	Hansahallen - assume database is correct	Phocoenidae	Phocoena phocoena	Phocoena	phocoena	f	Foe	19	10	1888	Hjeltefjorden		Hordaland	Norway
WF		ZMUB 001161	YES Nov 22 w picture/ note	Phocoenidae	Phocoena phocoena	Phocoena	phocoena	f	Foe	05	03	1888	Fjell	Fjell	Hordaland	Norway
WF		ZMUB 001215	YES Nov 22 w picture/ note	Balaenopteridae	Balaenoptera acutorostrata	Balaenoptera	acutorostrata	f	Foe	21	05	1889	Skogsvåg	Sund	Hordaland	Norway
WF		ZMUB 001246	YES Nov 22 w picture/ note	Balaenopteridae	Balaenoptera acutorostrata	Balaenoptera	acutorostrata	f	Foe	06	05	1889	Florvåg	Askøy	Hordaland	Norway
WF		ZMUB 002106	YES Nov 22 w picture/ note	Phocoenidae	Phocoena phocoena	Phocoena	phocoena	f	Foe	19	12	1891	Hjeltefjorden		Hordaland	Norway
WF		ZMUB 001156	YES Nov 22 w picture/ note	Phocoenidae	Phocoena phocoena	Phocoena	phocoena	f	Foe	29	02	1892	Espevær	Bømlo	Hordaland	Norway
WF		ZMUB 000485	Hansahallen - assume database is correct	Balaenopteridae	Balaenoptera acutorostrata	Balaenoptera	acutorostrata	F	Foe	07	07	1894	Skogsvåg	Sund	Hordaland	Norway
WF		ZMUB 000486	YES Nov 22 w picture/ note	Balaenopteridae	Balaenoptera acutorostrata	Balaenoptera	acutorostrata	F	Foe	30	05	1894	Telavåg	Sund	Hordaland	Norway
WF		BM 000065	Hansahallen - assume database is correct	Phocoenidae	Phocoena phocoena	Phocoena	phocoena	f	Foe	19	03	1894	Hjeltefjorden		Hordaland	Norway
WF		ZMUB 001540	Hansahallen - assume database is correct	Balaenopteridae	Balaenoptera acutorostrata	Balaenoptera	acutorostrata	f	Foe	23	04	1901	Kolavåg	Askøy	Hordaland	Norway
WF		ZMUB 001543	YES Nov 22 w picture/ note	Balaenopteridae	Balaenoptera acutorostrata	Balaenoptera	acutorostrata	f	Foe	20	01	1901	Hetlevik	Askøy	Hordaland	Norway
WF		ZMUB 001539	Hansahallen - assume database is correct	Phocoenidae	Phocoena phocoena	Phocoena	phocoena	f	Foe	25	02	1901	Hjeltefjorden		Hordaland	Norway
WF		ZMUB 001555	YES Nov 22 w picture/ note	Phocoenidae	Phocoena phocoena	Phocoena	phocoena	f	Foe	05	11	1901	Hjeltefjorden		Hordaland	Norway
WF		ZMUB 001659	Hansahallen - assume database is correct	Phocoenidae	Phocoena phocoena	Phocoena	phocoena	f	Foe	06	11	1905	Hjeltefjorden		Hordaland	Norway
WF		ZMUB 001696	Hansahallen - assume database is correct	Delphinidae	Orcinus orca	Orcinus	orca	f	Foe	30	12	1906	Ekrhovda	Sund	Hordaland	Norway
WF		ZMUB 002097	YES Nov 22 w picture/ note	Delphinidae	Lagenorhynchus acutus	Lagenorhynchus	acutus	f	Foe	10	11	1907	Bildøybakken	Fjell	Hordaland	Norway
WF		ZMUB 002101	YES Nov 22 w picture/ note	Delphinidae	Lagenorhynchus acutus	Lagenorhynchus	acutus	f	Foe	10	11	1907	Bildøybakken	Fjell	Hordaland	Norway
WF		ZMUB 001699	YES Nov 22 w picture/ note	Delphinidae	Orcinus orca	Orcinus	orca	f	Foe	07	01	1907	Ekrhovda	Sund	Hordaland	Norway
WF		ZMUB 001699	Hansahallen - assume database is correct	Delphinidae	Orcinus orca	Orcinus	orca	f	Foe	07	01	1907	Ekrhovda	Sund	Hordaland	Norway
WF		ZMUB 001979	Hansahallen - assume database is correct	Phocoenidae	Phocoena phocoena	Phocoena	phocoena	f	Foe	20	11	1909	Hjeltefjorden		Hordaland	Norway
WF		ZMUB 002822	Hansahallen - assume database is correct	Phocoenidae	Phocoena phocoena	Phocoena	phocoena	f	Foe	16	10	1916	Bergen	Bergen	Hordaland	Norway
WF		ZMUB 004182	Hansahallen - assume database is correct	Phocoenidae	Phocoena phocoena	Phocoena	phocoena	f	Foe	03	10	1930	Knappskog	Fjell	Hordaland	Norway
WF		ZMUB 004237	Hansahallen - assume database is correct	Phocoenidae	Phocoena phocoena	Phocoena	phocoena	f	Foe	23	11	1933	Knappskog	Fjell	Hordaland	Norway
WF		ZMUB 004322	Hansahallen - assume database is correct	Phocoenidae	Phocoena phocoena	Phocoena	phocoena	f	Foe	14	10	1939	Knappskog	Fjell	Hordaland	Norway
WF		ZMUB 005338	Hansahallen - assume database is correct	Balaenopteridae	Balaenoptera acutorostrata	Balaenoptera	acutorostrata	f	Foe	25	05	1983	Barentshavet			Norway	Institute of Marine Research	Research institusion
WF		ZMUB 005340	Hansahallen - assume database is correct	Balaenopteridae	Balaenoptera acutorostrata	Balaenoptera	acutorostrata	f	Foe	01	06	1983	Barentshavet			Norway
WF		ZMUB 005342	Hansahallen - assume database is correct	Balaenopteridae	Balaenoptera acutorostrata	Balaenoptera	acutorostrata	f	Foe	01	06	1983	Barentshavet			Norway
WF		ZMUB 001255	Hansahallen - assume database is correct	Balaenopteridae	Balaenoptera acutorostrata	Balaenoptera	acutorostrata	f	Foe				Skogsvåg	Sund	Hordaland	Norway
WF		ZMUB 001270	Hansahallen - assume database is correct	Balaenopteridae	Balaenoptera acutorostrata	Balaenoptera	acutorostrata	f	Foe				Skogsvåg	Sund	Hordaland	Norway
WF		ZMUB 001151	YES Nov 22 w picture/ note	Phocoenidae	Phocoena phocoena	Phocoena	phocoena	f	Foe				Bergen	Bergen	Hordaland	Norway
WF		ZMUB 001132	Hansahallen - assume database is correct	Monodontidae	Delphinapterus leucas	Delphinapterus	leucas	f	Foe						Spitsbergen	Svalbard
WF		ZMUB 001153	YES Nov 22 w picture/ note	Phocoenidae	Phocoena phocoena	Phocoena	phocoena	m	Foe	28	02	1881	Hjeltefjorden		Hordaland	Norway
WF		ZMUB 001159	YES Nov 22 w picture/ note	Phocoenidae	Phocoena phocoena	Phocoena	phocoena	m	Foe	28	01	1884	Florvåg	Askøy	Hordaland	Norway
WF		ZMUB 001146	Hansahallen - assume database is correct	Phocoenidae	Phocoena phocoena	Phocoena	phocoena	m	Foe	26	11	1886	Hjeltefjorden		Hordaland	Norway
WF		ZMUB 001148	Hansahallen - assume database is correct	Phocoenidae	Phocoena phocoena	Phocoena	phocoena	m	Foe	13	11	1889	Hjeltefjorden		Hordaland	Norway
WF		BM 000014	YES Nov 22 w picture/ note	Phocoenidae	Phocoena phocoena	Phocoena	phocoena	m	Foe	10	02	1893	Hjeltefjorden		Hordaland	Norway
WF		BM 000023	Hansahallen - assume database is correct	Phocoenidae	Phocoena phocoena	Phocoena	phocoena	m	Foe	08	04	1893	Knappskog (?)	Fjell	Hordaland	Norway
WF		BM 000025	Hansahallen - assume database is correct	Phocoenidae	Phocoena phocoena	Phocoena	phocoena	m	Foe	09	05	1893	Hjeltefjord		Hordaland	Norway
WF		BM 000562	Hansahallen - assume database is correct	Phocoenidae	Phocoena phocoena	Phocoena	phocoena	m	Foe	06	10	1894	Knappskog	Fjell	Hordaland	Norway
WF		BM 000572	Hansahallen - assume database is correct	Phocoenidae	Phocoena phocoena	Phocoena	phocoena	M	Foe	10	10	1894	Knappskog	Fjell	Hordaland	Norway
WF		ZMUB 001488	Hansahallen - assume database is correct	Phocoenidae	Phocoena phocoena	Phocoena	phocoena	m	Foe	10	11	1898	Brattholmen	Fjell	Hordaland	Norway
WF		ZMUB 001542	YES Nov 22 w picture/ note	Balaenopteridae	Balaenoptera acutorostrata	Balaenoptera	acutorostrata	m	Foe	10	05	1901	Låkøy	Fjell	Hordaland	Norway
WF		ZMUB 001544	YES Nov 22 w picture/ note	Balaenopteridae	Balaenoptera acutorostrata	Balaenoptera	acutorostrata	m	Foe	18	07	1901	Skogsvåg	Sund	Hordaland	Norway
WF		ZMUB 001598	Hansahallen - assume database is correct	Phocoenidae	Phocoena phocoena	Phocoena	phocoena	m	Foe	22	10	1903	Hjeltefjord		Hordaland	Norway
WF		ZMUB 001628	Hansahallen - assume database is correct	Phocoenidae	Phocoena phocoena	Phocoena	phocoena	m	Foe	26	10	1904	Hjeltefjord		Hordaland	Norway
WF		ZMUB 001630	Hansahallen - assume database is correct	Phocoenidae	Phocoena phocoena	Phocoena	phocoena	m	Foe	30	10	1904	Hjeltefjorden		Hordaland	Norway
WF		ZMUB 001648	Hansahallen - assume database is correct	Balaenopteridae	Balaenoptera acutorostrata	Balaenoptera	acutorostrata	m	Foe	08	06	1905	Skogsvåg	Sund	Hordaland	Norway
WF		ZMUB 001652	Hansahallen - assume database is correct	Phocoenidae	Phocoena phocoena	Phocoena	phocoena	m	Foe	20	09	1905	Hjeltefjord		Hordaland	Norway
WF		ZMUB 001711	Hansahallen - assume database is correct	Balaenopteridae	Balaenoptera acutorostrata	Balaenoptera	acutorostrata	m	Foe	02	05	1907	Skogsvåg	Sund	Hordaland	Norway
WF		ZMUB 002090	Hansahallen - assume database is correct	Delphinidae	Lagenorhynchus acutus	Lagenorhynchus	acutus	m	Foe	10	11	1907	Bildøybakken	Fjell	Hordaland	Norway
WF		ZMUB 002092	YES Nov 22 w picture/ note	Delphinidae	Lagenorhynchus acutus	Lagenorhynchus	acutus	m	Foe	10	11	1907	Bildøybakken	Fjell	Hordaland	Norway
WF		ZMUB 002098	Hansahallen - assume database is correct	Delphinidae	Lagenorhynchus acutus	Lagenorhynchus	acutus	m	Foe	10	11	1907	Bildøybakken	Fjell	Hordaland	Norway
WF		ZMUB 001697	Hansahallen - assume database is correct	Delphinidae	Orcinus orca	Orcinus	orca	m	Foe	03	01	1907	Ekrhovda	Sund	Hordaland	Norway
WF		ZMUB 001990	Hansahallen - assume database is correct	Balaenopteridae	Balaenoptera acutorostrata	Balaenoptera	acutorostrata	m	Foe	21	04	1910	Skogsvåg	Sund	Hordaland	Norway
WF		ZMUB 001991	YES Nov 22 w picture/ note	Balaenopteridae	Balaenoptera acutorostrata	Balaenoptera	acutorostrata	m	Foe	02	05	1910	Skogsvåg	Sund	Hordaland	Norway
WF		ZMUB 001992	YES Nov 22 w picture/ note	Balaenopteridae	Balaenoptera acutorostrata	Balaenoptera	acutorostrata	m	Foe	04	05	1910	Skogsøy	Øygarden	Hordaland	Norway
WF		ZMUB 003276	YES Nov 22 w picture/ note	Balaenopteridae	Balaenoptera musculus	Balaenoptera	musculus	m	Foe			1913	Syd-Georgia			South Georgia	Dr. B. Källmann coll.
WF		ZMUB 002990	Hansahallen - assume database is correct	Balaenopteridae	Balaenoptera acutorostrata	Balaenoptera	acutorostrata	m	Foe	24	04	1918	Røvær	Haugesund	Rogaland	Norway
WF		ZMUB 004238	Hansahallen - assume database is correct	Phocoenidae	Phocoena phocoena	Phocoena	phocoena	m	Foe	23	11	1933	Knappskog	Fjell	Hordaland	Norway
WF		ZMUB 004292	Hansahallen - assume database is correct	Phocoenidae	Phocoena phocoena	Phocoena	phocoena	m	Foe	20	10	1936	Knappskog	Fjell	Hordaland	Norway
WF		ZMUB 004294	Hansahallen - assume database is correct	Phocoenidae	Phocoena phocoena	Phocoena	phocoena	m	Foe	14	11	1936	Hjeltefjorden		Hordaland	Norway
WF		ZMUB 004340	Hansahallen - assume database is correct	Phocoenidae	Phocoena phocoena	Phocoena	phocoena	m	Foe	12	10	1938	Knappskog	Fjell	Hordaland	Norway
WF		ZMUB 004342	YES Nov 22 w picture/ note	Phocoenidae	Phocoena phocoena	Phocoena	phocoena	m	Foe	10	11	1938	Knappskog	Fjell	Hordaland	Norway
WF		ZMUB 005337	YES Nov 22 w picture/ note	Balaenopteridae	Balaenoptera acutorostrata	Balaenoptera	acutorostrata	m	Foe	23	05	1983	Barentshavet			Norway	Institute of Marine Research	Research institusion
WF		ZMUB 005339	Hansahallen - assume database is correct	Balaenopteridae	Balaenoptera acutorostrata	Balaenoptera	acutorostrata	m	Foe	29	05	1983	Barentshavet			Norway
WF		ZMUB 005341	YES Nov 22 w picture/ note	Balaenopteridae	Balaenoptera acutorostrata	Balaenoptera	acutorostrata	m	Foe	01	06	1983	Barentshavet			Norway
WF		ZMUB 001254	Hansahallen - assume database is correct	Balaenopteridae	Balaenoptera acutorostrata	Balaenoptera	acutorostrata	m	Foe				Skogsvåg	Sund	Hordaland	Norway
WF		ZMUB 001152	YES Nov 22 w picture/ note	Phocoenidae	Phocoena phocoena	Phocoena	phocoena	m	Foe				Hjeltefjord		Hordaland	Norway
WF		ZMUB 001152	Hansahallen - assume database is correct	Phocoenidae	Phocoena phocoena	Phocoena	phocoena	m	Foe				Hjeltefjorden		Hordaland	Norway
WF	3186	1136	YES Nov 22 w picture/ note	Monodontidae	Delphinapterus leucas	Delphinapterus	leucas	M	Foe						Spitsbergen	Svalbard
WF	3187	1263	YES Nov 22 w picture/ note	Balaenopteridae	Balaenoptera acutorostrata	Balaenoptera	acutorostrata		Foe	8	6	1888	Skogsvåg	Sund	Hordaland	Norway
WF		BM 2690	YES Nov 22 w picture/ note		Lagenorhynchus acutus	Lagenorhynchus	acutus		foe			1907	Bildøybakken	Fjell	Hordaland	Norway
WF		BM 2096	YES Nov 22 w picture/ note		Lagenorhynchus acutus	Lagenorhynchus	acutus		Foe	10	11	1907	Bildøybakken	Fjell	Hordaland	Norway
WF		BM 4666	YES Nov 22 w picture/ note		Balaenoptera physalus	Balaenoptera	physalus		Foe		11	1948				South Georgia	T. Sparre
WF		BM 2996	YES Nov 22 w picture/ note		Balaenoptera physalus	Balaenoptera	physalus		Foe				Blomvåg fangststasjon			Norway
WF	3754	unum.	YES Nov 22 w picture/ note	Balaenopteridae	Balaenoptera acutorostrata	Balaenoptera	acutorostrata		Foe
WF		unumm.	Hansahallen - assume database is correct	Delphinidae	Orcinus orca	Orcinus	orca		Foe
WF	3755	unum.	YES Nov 22 w picture/ note	Phocoenidae	Phocoena phocoena	Phocoena	phocoena		Foe
WF	3577	unum.a	YES Nov 22 w picture/ note	Phocoenidae	Phocoena phocoena	Phocoena	phocoena		Foe
WF	3581	unum.a	YES Nov 22 w picture/ note	Phocoenidae	Phocoena phocoena	Phocoena	phocoena		Foe
WF	3578	unum.b	YES Nov 22 w picture/ note	Phocoenidae	Phocoena phocoena	Phocoena	phocoena		Foe
WF	3582	unum.b	YES Nov 22 w picture/ note	Phocoenidae	Phocoena phocoena	Phocoena	phocoena		Foe
WF	3579	unum.c	YES Nov 22 w picture/ note	Phocoenidae	Phocoena phocoena	Phocoena	phocoena		Foe
WF	3583	unum.c	YES Nov 22 w picture/ note	Phocoenidae	Phocoena phocoena	Phocoena	phocoena		Foe
WF	3580	unum.d	YES Nov 22 w picture/ note	Phocoenidae	Phocoena phocoena	Phocoena	phocoena		Foe
WF	3584	unum.d	YES Nov 22 w picture/ note	Phocoenidae	Phocoena phocoena	Phocoena	phocoena		Foe
WF	3585	unum.e	YES Nov 22 w picture/ note	Phocoenidae	Phocoena phocoena	Phocoena	phocoena		Foe
WF	3586	unum.f	YES Nov 22 w picture/ note	Phocoenidae	Phocoena phocoena	Phocoena	phocoena		Foe
WF	3587	unum.g	YES Nov 22 w picture/ note	Phocoenidae	Phocoena phocoena	Phocoena	phocoena		Foe
WO		ZMUB 001120	YES Nov 22 w picture/ note	Ziphiidae	Hyperoodon ampullatus	Hyperoodon	ampullatus				10	1881	"Stordöen"	Stord	Hordaland	Norway
WO		ZMUB 001328	Hansahallen - assume database is correct	Balaenopteridae	Balaenoptera acutorostrata	Balaenoptera	acutorostrata			09	11	1886	Skogsvåg	Sund	Hordaland	Norway
WO		ZMUB 001329	Hansahallen - assume database is correct	Balaenopteridae	Balaenoptera acutorostrata	Balaenoptera	acutorostrata			09	11	1886	Skogsvåg	Sund	Hordaland	Norway
WO		ZMUB 001330	YES Nov 22 w picture/ note	Balaenopteridae	Balaenoptera acutorostrata	Balaenoptera	acutorostrata			09	11	1886	Skogsvåg	Sund	Hordaland	Norway
WO		ZMUB 001332	Hansahallen - assume database is correct	Balaenopteridae	Balaenoptera acutorostrata	Balaenoptera	acutorostrata			09	11	1886	Skogsvåg	Sund	Hordaland	Norway
WO		ZMUB 001333	Hansahallen - assume database is correct	Balaenopteridae	Balaenoptera acutorostrata	Balaenoptera	acutorostrata			09	11	1886	Skogsvåg	Sund	Hordaland	Norway
WO		ZMUB 006323	YES Nov 22 w picture/ note	Delphinidae	Lagenorhynchus albirostris	Lagenorhynchus	albirostris				04	1887	Bildøy	Fjell	Hordaland	Norway		Mindre steng Bildø, mange ex kjøpt av museet. Kilde Collett p 681	K
WO		ZMUB 006326	Hansahallen - assume database is correct	Phocoenidae	Phocoena phocoena	Phocoena	phocoena			03	03	1890
WO		ZMUB 001124	YES Nov 22 w picture/ note	Balaenopteridae	Balaenoptera acutorostrata	Balaenoptera	acutorostrata			30	05	1894	Skogsvåg	Sund	Hordaland	Norway
WO		ZMUB 001097	Hansahallen - assume database is correct	Balaenopteridae	Balaenoptera acutorostrata	Balaenoptera	acutorostrata			29	08	1895	Landenes/Viksnes	Karmøy	Rogaland	Norway
WO		ZMUB 001097	YES Nov 22 w picture/ note	Ziphiidae	Mesoplodon bidens	Mesoplodon	bidens			29	08	1895	Landenes/Viksnes	Karmøy	Rogaland	Norway
WO		001974	YES Nov 22 w picture/ note	Physeteridae	Physeter catodon	Physeter	catodon			15	08	1903	Landenes/Viksnes			Iceland
WO		001975	YES Nov 22 w picture/ note	Physeteridae	Physeter catodon	Physeter	catodon			15	08	1903	Mivfjord			Iceland
WO		ZMUB 002104	YES Nov 22 w picture/ note	Delphinidae	Lagenorhynchus acutus	Lagenorhynchus	acutus			10	11	1907	Bildøybakken	Fjell	Hordaland	Norway
WO		ZMUB 006327	YES Nov 22 w picture/ note	Ziphiidae	Mesoplodon bidens	Mesoplodon	bidens			21	06	1908
WO		ZMUB 004668	YES Nov 22 w picture/ note	Balaenopteridae	Balaenoptera acutorostrata	Balaenoptera	acutorostrata				11	1948	Syd-Georgia			South Georgia	T. Sparre
WO		ZMUB 005336	YES Nov 22 w picture/ note	Balaenopteridae	Balaenoptera acutorostrata	Balaenoptera	acutorostrata			23	05	1983	Barentshavet			Norway	Institute of Marine Research	Research institusion
WO		ZMUB 001123	YES Nov 22 w picture/ note	Delphinidae	Orcinus orca	Orcinus	orca						Bildøybakken	Fjell	Hordaland	Norway
WO		ZMUB 001123	Hansahallen - assume database is correct	Delphinidae	Orcinus orca	Orcinus	orca						Bildøybakken	Fjell	Hordaland	Norway
WO		ZMUB 001298	Hansahallen - assume database is correct	Delphinidae	Orcinus orca	Orcinus	orca
WO		ZMUB 001299	Hansahallen - assume database is correct	Delphinidae	Orcinus orca	Orcinus	orca
WO		ZMUB 001300	Hansahallen - assume database is correct	Delphinidae	Orcinus orca	Orcinus	orca
WO		ZMUB 003131	Hansahallen - assume database is correct	Delphinidae	Orcinus orca	Orcinus	orca
WO		ZMUB 003132	Hansahallen - assume database is correct	Delphinidae	Orcinus orca	Orcinus	orca
WO		ZMUB 006325	Hansahallen - assume database is correct	Phocoenidae	Phocoena phocoena	Phocoena	phocoena
WO		ZMUB 006322	YES Nov 22 w picture/ note	Delphinidae	Orcinus orca	Orcinus	orca	f		10	01	1907	Ekrhovda	Fjell	Hordaland	Norway
WO		ZMUB 001326	Hansahallen - assume database is correct	Delphinidae	Orcinus orca	Orcinus	orca	m					Bildøy	Fjell	Hordaland	Norway
WO	3305	1972	DID NOT SEE IN EXHIBIT	Ziphiidae	Hyperoodon ampullatus	Hyperoodon	ampullatus				6	1886	Ishavet			Arctic Ocean	Kapt. Falck
WO		unumm.	Hansahallen - assume database is correct	Delphinidae	Orcinus orca	Orcinus	orca
WO		unumm.	Hansahallen - assume database is correct	Delphinidae	Orcinus orca	Orcinus	orca
WO	3155	891	DID NOT SEE IN EXHIBIT	Balaenopteridae	Balaenoptera borealis	Balaenoptera	borealis						Sörvær			Norway	Dr. Brunchorst
WO	3865	unum.			?

## Sheet: NHM Oslo specimens
Preptype category	Full museum number	Other museum number	Pers. obs. LLD 2022	Family	Latin name	Latin Genus	Latin Species	Sex	Ontogeny	DD	MD	YEAR	Locality	Municipality	County	Country	Collector	Occupation/ title of collector	Aquired how K= bought, G= gift, B = swap, Ex= from field exursion
B	NHMO-DMA-31434/1-P	M 3215	yes	Balaenopteridae	Balaenoptera acutorostrata	Balaenoptera	acutorostrata					1859				Norway
B	NHMO-DMA-31711/1-P	M 3764	no	Balaenidae	Balaena mysticetus	Balaena	mysticetus					1862				Arctic Ocean: Nordishavet
B	NHMO-DMA-32290/1-P	M 6067 NB same specimen as 6065	no	Balaenopteridae	Balaenoptera musculus	Balaenoptera	musculus			19	7	1881		Vadsø	Finnmark	Norway	Guldberg	scientist	fra conserv, Guldbergs reise 1881
B	NHMO-DMA-32347/1-P	M 6224	no	Balaenopteridae	Balaenoptera musculus	Balaenoptera	musculus		Foetus			1881		Vadsø	Finnmark	Norway	Guldberg	scientist	fra conserv, Guldbergs reise 1881
B	specimen added by LLD; not found in database	no museum number	yes		Eubalaena australis	Eubalaena	australis				6	1893			Campbell Island	New Zealand	Chr.sen
B	NHMO-DMA-39712/1-P	94-69	no	Balaenopteridae	? ?	?	?				5	1969	Tromsø hvalstasjon		Troms	Norway	Lid, Gunnar
B	specimen added by LLD; not found in database	specimen lacks museum number	yes		Balaenoptera borealis	Balaenoptera	borealis					1912/1914				South Africa	Ørjan Olsen	Zoologist/ expedition guy
B	specimen added by LLD; not found in database	4761	yes		Balaena mysticetus	Balaena	mysticetus
OT	NHMO-DMA-55975	Dette KAN være samme objekt som er registrert som NHMO-DMA-32138, 32139 og 32141, men det er ingen merking som kan bekrefte dette (ulik dato kan skyldes f.eks. at 10.03.1919 er dato for innregistrering mens 1875, som er oppgitt på de andre acc., er CollDate).	yes		Monodon monoceros	Monodon	monoceros	F		10	3	1919					Bangert
OT	specimen added by LLD; no museum number	no museum number	yes		Physeter macrocephalus	Physeter	macrocephalus	F								Iceland
OT	NHMO-DMA-29520/1-O	4621	no	Balaenopteridae	Balaenoptera physalus	Balaenoptera	physalus	Female	Subadult		1	1867			Hedmark
OT	NHMO-DMA-30532/1-O = NHMO-DMA-29953/1-O	5639, 5640, 5684	yes	Phocoenidae	Phocoena phocoena	Phocoena	phocoena	Female	Juvenile			1878		Oslofjorden	Oslo	Norway			Kjøpt
OT	NHMO-DMA-32078/1-O	M 5089	yes	Monodontidae	Monodon monoceros	Monodon	monoceros	Female				1896				Greenland
OT	NHMO-DMA-29130/1-O	3390	yes	Physeteridae	Physeter macrocephalus	Physeter	macrocephalus	Female				1904				Iceland
OT	NHMO-DMA-34002/1-O	100-63	yes	Phocoenidae	Phocoena phocoena	Phocoena	phocoena	Female	Juvenile	12	12	1963	Bud	Fræna	Møre og Romsdal	Norway	Vik, Rolf	Scientist
OT	NHMO-DMA-35660/1-O	1990-22	yes	Phocoenidae	Phocoena phocoena	Phocoena	phocoena	Female		28	5	1990		Malmøy	Oslo	Norway	Westereng, Gudmund		Found dead, unknown reason
OT	NHMO-DMA-35664/1-O	1991-38	no	Balaenopteridae	Balaenoptera acutorostrata	Balaenoptera	acutorostrata	Female	Juvenile	17	9	1991	Bunnefjorden		Akershus	Norway	Tiedemand-Johannesen, P.
OT	NHMO-DMA-39640/1-O	91-3	yes	Phocoenidae	Phocoena phocoena	Phocoena	phocoena	Female	Juvenile	26	2	1991	Filtvedt	Hurum	Buskerud	Norway			"lungebetennelse"
OT	NHMO-DMA-43162/1-O	11030	yes	Phocoenidae	Phocoena phocoena	Phocoena	phocoena	Female		29	6	1998		Sognefjord	Sogn og Fjordane	Norway	Institute of Marine Research	Research institution	Found stranded
OT	NHMO-DMA-43117/1-O	10986	yes	Phocoenidae	Phocoena phocoena	Phocoena	phocoena	Female		5	4	1999		Vadsø	Finnmark	Norway	Institute of Marine Research	Research institution	Mish net/ fishing net( fish trap
OT	NHMO-DMA-43130/1-O	10998	yes	Phocoenidae	Phocoena phocoena	Phocoena	phocoena	Female		28	4	1999		Lurøy	Nordland	Norway	Institute of Marine Research	Research institution	Mish net/ fishing net( fish trap
OT	NHMO-DMA-43139/1-O	11007	yes	Phocoenidae	Phocoena phocoena	Phocoena	phocoena	Female		5	4	1999		Vadsø	Finnmark	Norway	Institute of Marine Research	Research institution	Mish net/ fishing net( fish trap
OT	NHMO-DMA-43142/1-O	11010	yes	Phocoenidae	Phocoena phocoena	Phocoena	phocoena	Female		5	4	1999		Vadsø	Finnmark	Norway	Institute of Marine Research	Research institution	Mish net/ fishing net( fish trap
OT	NHMO-DMA-43150/1-O	11018	yes	Phocoenidae	Phocoena phocoena	Phocoena	phocoena	Female		5	4	1999		Karmøy	Rogaland	Norway	Institute of Marine Research	Research institution	Mish net/ fishing net( fish trap
OT	NHMO-DMA-43151/1-O	11019	yes	Phocoenidae	Phocoena phocoena	Phocoena	phocoena	Female		4	6	1999	Jarfjord	Sør-Varanger	Finnmark	Norway	Institute of Marine Research	Research institution	Mish net/ fishing net( fish trap
OT	NHMO-DMA-43152/1-O	11020	yes	Phocoenidae	Phocoena phocoena	Phocoena	phocoena	Female		5	4	1999		Vadsø	Finnmark	Norway	Institute of Marine Research	Research institution	Mish net/ fishing net( fish trap
OT	NHMO-DMA-43154/1-O	11022	yes	Phocoenidae	Phocoena phocoena	Phocoena	phocoena	Female		5	4	1999		Vadsø	Finnmark	Norway	Institute of Marine Research	Research institution	Mish net/ fishing net( fish trap
OT	NHMO-DMA-43158/1-O	11026	yes	Phocoenidae	Phocoena phocoena	Phocoena	phocoena	Female		29	3	1999	Kjøllefjord	Lebesby	Finnmark	Norway	Institute of Marine Research	Research institution	Mish net/ fishing net( fish trap
OT	NHMO-DMA-42918/1-O	10787	yes	Phocoenidae	Phocoena phocoena	Phocoena	phocoena	Female		9	1	2000	Hella	Nøtterøy	Vestfold	Norway	Aase, Steinar		Found dead.
OT	NHMO-DMA-43124/1-O	10992	yes	Phocoenidae	Phocoena phocoena	Phocoena	phocoena	Female		4	4	2000	Skillefjord	Alta	Finnmark	Norway	Institute of Marine Research	Research institution	Mish net/ fishing net( fish trap
OT	NHMO-DMA-43128/1-O	10996	yes	Phocoenidae	Phocoena phocoena	Phocoena	phocoena	Female		21	3	2000		Karmøy	Rogaland	Norway	Institute of Marine Research	Research institution	Mish net/ fishing net( fish trap
OT	NHMO-DMA-43129/1-O	10997	yes	Phocoenidae	Phocoena phocoena	Phocoena	phocoena	Female		30	3	2000		Mandal	Vest-Agder	Norway	Institute of Marine Research	Research institution	Mish net/ fishing net( fish trap
OT	NHMO-DMA-43133/1-O	11001	yes	Phocoenidae	Phocoena phocoena	Phocoena	phocoena	Female		18	2	2000		Hardangerfjorden	HOrdaland	Norway	Institute of Marine Research	Research institution	Mish net/ fishing net( fish trap
OT	NHMO-DMA-43144/1-O	11012	yes	Phocoenidae	Phocoena phocoena	Phocoena	phocoena	Female		5	5	2000		Kvalsund	Finnmark	Norway	Institute of Marine Research	Research institution	Mish net/ fishing net( fish trap
OT	NHMO-DMA-43147/1-O	11015	yes	Phocoenidae	Phocoena phocoena	Phocoena	phocoena	Female		24	3	2000	Lepsøy	Os	Hordaland	Norway	Institute of Marine Research	Research institution	Mish net/ fishing net( fish trap
OT	NHMO-DMA-43155/1-O	11023	yes	Phocoenidae	Phocoena phocoena	Phocoena	phocoena	Female		6	4	2000		Fedje	Hordaland	Norway	Institute of Marine Research	Research institution	Mish net/ fishing net( fish trap
OT	NHMO-DMA-30014/1-O	5938	no	Balaenopteridae	Balaenoptera acutorostrata	Balaenoptera	acutorostrata	Female							Oslofjorden	Norway			"Captured" Collett mentioned in comment
OT	NHMO-DMA-32381/1-O	M 6329	yes	Delphinidae	Lagenorhynchus albirostris	Lagenorhynchus	albirostris	Female, non pregnant	Subadult	23	4	1887		Fredrikstad	Østfold	Norway			shot, among a smaller pack of specimens
OT	NHMO-DMA-32138/1-O	M 5406 NB [Preparation]:cran m/tann. Skallen KAN være samme objekt som er reg. som NHMO-DMA-55675/1-O.	no	Monodontidae	Monodon monoceros	Monodon	monoceros	Male				1875				Greenland	Brun, Carsten Henrik (Kapt.)	Captain
OT	NHMO-DMA-30043/1-O	6155	yes	Balaenopteridae	Balaenoptera musculus	Balaenoptera	musculus	Male	Foetus		7	1881			Vadsø	Norway	Fra Foyns etbl. Guldberg	Scientist
OT	NHMO-DMA-30057/1-O	6253	yes	Balaenopteridae	Balaenoptera musculus	Balaenoptera	musculus	Male	Foetus	26	7	1881	Jarfjord	Sør-Varanger	Finnmark	Norway	Guldberg	Scientist
OT	NHMO-DMA-30070/1-O	6355	yes	Phocoenidae	Phocoena phocoena	Phocoena	phocoena	Male	Adult	4	10	1887		Drøbak	Akershus	Norway			K
OT	NHMO-DMA-25158/1-P	u/nr	no	Delphinidae	Lagenorhynchus albirostris	Lagenorhynchus	albirostris	Male		28	12	1890		Tjøme	Vestfold	Norway			Kjøpt. Also Collett p 681, tells it was killed
OT	NHMO-DMA-32676/1-O	M 7191	yes	Ziphiidae	Mesoplodon bidens	Mesoplodon	bidens	Male		7	9	1907	Hopen	Nord-Smølen		Svalbard	Eilertsen, N.		Gift by a local after being ophugget. See Collett p 652
OT	NHMO-DMA-38044/1-O	47-64	yes	Phocoenidae	Phocoena phocoena	Phocoena	phocoena	Male		23	4	1964		Bergen	Hordaland	Norway	Vik, Rolf, dosent	scientist
OT	NHMO-DMA-38089/1-O	48-64	yes	Phocoenidae	Phocoena phocoena	Phocoena	phocoena	Male		23	4	1964		Bergen	Hordaland	Norway	Vik, Rolf	scientist
OT	NHMO-DMA-35530/1-O	1973-9	yes	Delphinidae	Lagenorhynchus albirostris	Lagenorhynchus	albirostris	Male			5	1973	Håøya	Frogn	Akershus	Norway	Pedersen, Jørgen A.		stranded, found dead and very rotten
OT	NHMO-DMA-33940/1-O	8-82	yes	Phocoenidae	Phocoena phocoena	Phocoena	phocoena	Male		11	5	1982	Oklungen, N for Bjørkøya		Akershus	Norway	Snekstad		Mish net/ fishing net/ fish trap
OT	NHMO-DMA-35646/1-O	1989-21	yes	Phocoenidae	Phocoena phocoena	Phocoena	phocoena	Male		9	3	1989		Rygge	Østfold	Norway
OT	NHMO-DMA-39593/1-O	90-21	yes	Phocoenidae	Phocoena phocoena	Phocoena	phocoena	Male		9	11	1990	Fyllingen (sfiteren??) Småskjær v. side ca 20 m dyp		Akershus	Norway
OT	NHMO-DMA-43118/1-O = NHMO-DMA-43119/1-O	10987	yes	Phocoenidae	Phocoena phocoena	Phocoena	phocoena	Male		5	4	1999		Karmøy	Rogaland	Norway	Institute of Marine Research	Research institution	Mish net/ fishing net( fish trap
OT	NHMO-DMA-43120/1-O	10988	yes	Phocoenidae	Phocoena phocoena	Phocoena	phocoena	Male		5	4	1999		Vadsø	Finnmark	Norway	Institute of Marine Research	Research institution	Mish net/ fishing net( fish trap
OT	NHMO-DMA-43121/1-O	10989	yes	Phocoenidae	Phocoena phocoena	Phocoena	phocoena	Male		5	4	1999		Karmøy	Rogaland	Norway	Institute of Marine Research	Research institution	Mish net/ fishing net( fish trap
OT	NHMO-DMA-43123/1-O	10991	yes	Phocoenidae	Phocoena phocoena	Phocoena	phocoena	Male				1999	Kirkenes	Sør-Varanger	Finnmark	Norway	Institute of Marine Research	Research institution	Mish net/ fishing net( fish trap
OT	NHMO-DMA-43131/1-O	10999	yes	Phocoenidae	Phocoena phocoena	Phocoena	phocoena	Male		12	4	1999		Eigersund	Rogaland	Norway	Institute of Marine Research	Research institution	Mish net/ fishing net( fish trap
OT	NHMO-DMA-43132/1-O	11000	yes	Phocoenidae	Phocoena phocoena	Phocoena	phocoena	Male		5	4	1999		Vadsø	Finnmark	Norway	Institute of Marine Research	Research institution	Mish net/ fishing net( fish trap
OT	NHMO-DMA-43134/1-O	11002	yes	Phocoenidae	Phocoena phocoena	Phocoena	phocoena	Male				1999	Kirkenes	Sør-Varanger	Finnmark	Norway	Institute of Marine Research	Research institution	Mish net/ fishing net( fish trap
OT	NHMO-DMA-43135/1-O	11003	yes	Phocoenidae	Phocoena phocoena	Phocoena	phocoena	Male				1999	Kjøllefjord	Lebesby	Finnmark	Norway	Institute of Marine Research	Research institution	Mish net/ fishing net( fish trap
OT	NHMO-DMA-43136/1-O	11004	yes	Phocoenidae	Phocoena phocoena	Phocoena	phocoena	Male		24	4	1999		Gamvik	Finnmark	Norway	Institute of Marine Research	Research institution	Mish net/ fishing net( fish trap
OT	NHMO-DMA-43137/1-O	11006	yes	Phocoenidae	Phocoena phocoena	Phocoena	phocoena	Male		19	4	1999		Mandal	Vest-Agder	Norway	Institute of Marine Research	Research institution	Mish net/ fishing net( fish trap
OT	NHMO-DMA-43145/1-O	11013	yes	Phocoenidae	Phocoena phocoena	Phocoena	phocoena	Male		5	5	1999		Karmøy	Rogaland	Norway	Institute of Marine Research	Research institution	Mish net/ fishing net( fish trap
OT	NHMO-DMA-43153/1-O	11021	yes	Phocoenidae	Phocoena phocoena	Phocoena	phocoena	Male		29	3	1999	Kjøllefjord	Lebesby	Finnmark	Norway	Institute of Marine Research	Research institution	Mish net/ fishing net( fish trap
OT	NHMO-DMA-43157/1-O	11025	yes	Phocoenidae	Phocoena phocoena	Phocoena	phocoena	Male				1999	Kirkenes	Sør-Varanger	Finnmark	Norway	Institute of Marine Research	Research institution	Mish net/ fishing net( fish trap
OT	NHMO-DMA-43159/1-O	11027	yes	Phocoenidae	Phocoena phocoena	Phocoena	phocoena	Male		28	4	1999		Lurøy	Nordland	Norway	Institute of Marine Research	Research institution	Mish net/ fishing net( fish trap
OT	NHMO-DMA-43160/1-O	11028	yes	Phocoenidae	Phocoena phocoena	Phocoena	phocoena	Male		4	6	1999	Jarfjord	Sør-Varanger	Finnmark	Norway	Institute of Marine Research	Research institution	Mish net/ fishing net( fish trap
OT	NHMO-DMA-43161/1-O	11029	yes	Phocoenidae	Phocoena phocoena	Phocoena	phocoena	Male		4	6	1999	Jarfjord	Sør-Varanger	Finnmark	Norway	Institute of Marine Research	Research institution	Mish net/ fishing net( fish trap
OT	NHMO-DMA-42915/1-O	10784	yes	Phocoenidae	Phocoena phocoena	Phocoena	phocoena	Male			3	2000		Horten	Vestfold	Norway	Andersen, Ernst		Mish net/ fishing net/ fish trap Rundmål 870.. Tatt på 70-80m dyp.
OT	NHMO-DMA-43116/1-O	10985	yes	Phocoenidae	Phocoena phocoena	Phocoena	phocoena	Male		21	3	2000	Lepsøy	Os	Hordaland	Norway	Institute of Marine Research	Research institution	Mish net/ fishing net( fish trap
OT	NHMO-DMA-43122/1-O	10990	yes	Phocoenidae	Phocoena phocoena	Phocoena	phocoena	Male		17	3	2000		Karmøy	Rogaland	Norway	Institute of Marine Research	Research institution	Mish net/ fishing net( fish trap
OT	NHMO-DMA-43126/1-O	10994	yes	Phocoenidae	Phocoena phocoena	Phocoena	phocoena	Male		21	3	2000		Masfjorden	Hordaland	Norway	Institute of Marine Research	Research institution	Mish net/ fishing net( fish trap
OT	NHMO-DMA-43127/1-O	10995	yes	Phocoenidae	Phocoena phocoena	Phocoena	phocoena	Male		3	4	2000		Nesseby	Finnmark	Norway	Institute of Marine Research	Research institution	Mish net/ fishing net( fish trap
OT	NHMO-DMA-43137/1-O	11005	yes	Phocoenidae	Phocoena phocoena	Phocoena	phocoena	Male		7	3	2000		Træna	Nordland	Norway	Institute of Marine Research	Research institution	Mish net/ fishing net( fish trap
OT	NHMO-DMA-43140/1-O	11008	yes	Phocoenidae	Phocoena phocoena	Phocoena	phocoena	Male		14	3	2000		Karmøy	Rogaland	Norway	Institute of Marine Research	Research institution	Mish net/ fishing net( fish trap
OT	NHMO-DMA-43141/1-O	11009	yes	Phocoenidae	Phocoena phocoena	Phocoena	phocoena	Male		4	4	2000		Sømna	Nordland	Norway	Institute of Marine Research	Research institution	Mish net/ fishing net( fish trap
OT	NHMO-DMA-43143/1-O	11011	yes	Phocoenidae	Phocoena phocoena	Phocoena	phocoena	Male		2	5	2000	Rot	Nordreisa	Troms	Norway	Institute of Marine Research	Research institution	Mish net/ fishing net( fish trap
OT	NHMO-DMA-43146/1-O	11014	yes	Phocoenidae	Phocoena phocoena	Phocoena	phocoena	Male		7	3	2000	Lepsøy	Os	Hordaland	Norway	Institute of Marine Research	Research institution	Mish net/ fishing net( fish trap
OT	NHMO-DMA-43148/1-O	11016	yes	Phocoenidae	Phocoena phocoena	Phocoena	phocoena	Male	juvenile	16	10	2000		Fedje	Hordaland	Norway	Institute of Marine Research	Research institution	Mish net/ fishing net( fish trap
OT	NHMO-DMA-43149/1-O	11017	yes	Phocoenidae	Phocoena phocoena	Phocoena	phocoena	Male		1	3	2000	Lepsøy	Os	Hordaland	Norway	Institute of Marine Research	Research institution	Mish net/ fishing net( fish trap
OT	NHMO-DMA-43156/1-O	11024	yes	Phocoenidae	Phocoena phocoena	Phocoena	phocoena	Male		27	3	2000		Bindal	Nordland	Norway	Institute of Marine Research	Research institution	Mish net/ fishing net( fish trap
OT	NHMO-DMA-43209/1-O	11077	no	Phocoenidae	Phocoena phocoena	Phocoena	phocoena	Male		21	3	2000	Lepsøy	Os	Hordaland	Norway	Institute of Marine Research	Research institution	Mish net/ fishing net( fish trap
OT	NHMO-DMA-46574/1-O	14566	yes	Monodontidae	Monodon monoceros	Monodon	monoceros	tusk - likely male								Svalbard	Sysselmannen/ Gudmund Westereng	Managament
OT	specimen added by LLD; not found in database	specimen lacks museum number	yes	Monodontidae	Monodon monoceros	Monodon	monoceros	tusk - likely male
OT	specimen added by LLD; not found in database	specimen lacks museum number	yes	Monodontidae	Monodon monoceros	Monodon	monoceros	tusk - likely male
OT	specimen added by LLD; not found in database	specimen lacks museum number	yes	Monodontidae	Monodon monoceros	Monodon	monoceros	tusk - likely male
OT	specimen added by LLD; not found in database	specimen lacks museum number	yes	Monodontidae	Monodon monoceros	Monodon	monoceros	tusk - likely male
OT	specimen added by LLD; not found in database	specimen lacks museum number	yes	Monodontidae	Monodon monoceros	Monodon	monoceros	tusk - likely male
OT	NHMO-DMA-25160/1-O	specimen lacks museum number	no	Delphinidae	Orcinus orca	Orcinus	orca					1820	Slæbene	Asker	Akershus	Norway			Captured.
OT	NHMO-DMA-31681/1-O	M 3674	no	Balaenidae	Balaena sp.	Balaena	mysticetus					1834	Oslo ladegård		Oslo	Norway	"Gitt av prof. Holst 1858"	Scientist	G
OT	NHMO-DMA-25154/1-O	u/nr	no	Delphinidae	Delphinus delphis	Delphinus	delphis					1839				Africa (continent)
OT	NHMO-DMA-27312/1-O	1202	no	Delphinidae	Globicephala melas	Globicephala	melas					1839				Atlantic Ocean			K
OT	NHMO-DMA-30602/1-O	M 1203	yes	Delphinidae	Delphinus delphis	Delphinus	delphis					1839	Walfish Bay= Walvis bay			Namibia			Kjøpt I 1939. Funnet igjen 1880. KJøpt fra Verroux I Paris ved J. Heiberg som skelet, nu blot cranium og et scapula ( f no 4463) igjen
OT	NHMO-DMA-31220/1-O	M 2645	yes	Delphinidae	Lagenorhynchus acutus	Lagenorhynchus	acutus					1842	Frogn	Drøbak		Norway			fish net with 22 others, see Wiig and Bachmann. Also Collett p 688
OT	NHMO-DMA-30047/1-O	6179	no	Ziphiidae	Hyperoodon ampullatus	Hyperoodon	ampullatus				8	1846			Oslofjorden	Norway			stranded, found dead, unknown reason. Also mentioned p 640 in Collett 1912; two individuals stranded, one to the museum
OT	NHMO-DMA-30740/1-O	M 1478	no	Delphinidae	Globicephala melas	Globicephala	melas					1852					Homann (?)	Distriktlege	G
OT	NHMO-DMA-31945/1-O	M 4542	yes	Monodontidae	Delphinapterus leucas	Delphinapterus	leucas					1854				Greenland	Halböll (Kapt.)	Captain	K "Fanget av kapt. Halböll. Kjøpt I Kjøbenhavn 1866"
OT	specimen added by LLD; not found in database	2444	yes	Delphinidae	Delphinus ?	Delphinus	?					1854
OT	specimen added by LLD; not found in database	2450	yes	Delphinidae	Delphinus ?	Delphinus	?					1854
OT	NHMO-DMA-25155/1-O	u/nr	no	Delphinidae	Delphinus delphis	Delphinus	delphis					1855	Oslofjorden		Oslo	Norway
OT	NHMO-DMA-31226/1-O	M 2665	yes	Monodontidae	Monodon monoceros	Monodon	monoceros					1856	Nordishavet			Arctic Ocean
OT	NHMO-DMA-31361/1-O, NHMO-DMA-31362/1-O, NHMO-DMA-31363/1-O and NHMO-DMA-31364/1-O = all the same specimen	M 3051, 3052, 3053, 3054	no	Balaenopteridae	Balaenoptera musculus	Balaenoptera	musculus					1858		Tvedestrand	Aust-Agder	Norway
OT	NHMO-DMA-25165/1-O	u/nr	no	Phocoenidae	Phocoena phocoena	Phocoena	phocoena					1858			Hedmark
OT	NHMO-DMA-29029/1-O	3033. old no 137b	yes	Phocoenidae	Phocoena phocoena	Phocoena	phocoena					1858			Hedmark
OT	NHMO-DMA-31849/1-O	M 4287	yes	Ziphiidae	Mesoplodon bidens	Mesoplodon	bidens					1860				Norway
OT	NHMO-DMA-29157/1-O	3520	yes	Monodontidae	Monodon monoceros	Monodon	monoceros					1861	Nordishavet			Arctic Ocean			Kjøpt
OT	NHMO-DMA-31646/1-O	M 3578	no	Balaenidae	Balaena sp.	Balaena	mysticetus					1861				Norway
OT	NHMO-DMA-31709/1-O	M 3750	no	Delphinidae	Globicephala melas	Globicephala	melas					1862				Atlantic Ocean
OT	NHMO-DMA-31696/1-O	M 3725	no	Monodontidae	Monodon monoceros	Monodon	monoceros					1862
OT	NHMO-DMA-31786/1-O	M 4002	no	Delphinidae	Lagenorhynchus acutus	Lagenorhynchus	acutus					1863		Oslofjorden		Norway
OT	NHMO-DMA-31787/1-O	M 4003	yes	Delphinidae	Lagenorhynchus acutus	Lagenorhynchus	acutus					1863		Oslofjorden		Norway
OT	NHMO-DMA-31788/1-O	M 4004	no	Delphinidae	Lagenorhynchus acutus	Lagenorhynchus	acutus					1863		Oslofjorden		Norway
OT	NHMO-DMA-31789/1-O	M 4005	no	Delphinidae	Lagenorhynchus acutus	Lagenorhynchus	acutus					1863		Oslofjorden		Norway
OT	NHMO-DMA-55627/1-O		yes	Delphinidae	Lagenorhynchus acutus	Lagenorhynchus	acutus					1863		Kopervik	Rogaland	Norway
OT	NHMO-DMA-29382/1-O	4006	yes	Delphinidae	Lagenorhynchus albirostris	Lagenorhynchus	albirostris					1863			Hedmark
OT	NHMO-DMA-29427/2-O and NHMO-DMA-29427/1-P = same specimen	4266, 4267 and 4268 = from samme individual.	yes	Ziphiidae	Hyperoodon ampullatus	Hyperoodon	ampullatus		Juvenile		10	1864		Stavern	Vestfold	Norway			stranded, found dead, unknwon reason. Also mentioned p 640 in Collett 1912; // kartotekkort p 127 says "fanget"xx
OT	NHMO-DMA-32259/1-O, NHMO-DMA-32258/1-O and NHMO-DMA-32260/1-O = same specimen	M 5936, M 5935 and M 5937	no	Balaenopteridae	Balaenoptera musculus or physalus	Balaenoptera	musculus or physalus					1865	Skråven I Lofoten	Vågan	Nordland	Norway	Sars, Georg Ossian	scientist	"Captured"
OT	NHMO-DMA-31860/1-O	M 4318	no	Delphinidae	Globicephala melas	Globicephala	melas					1865		Lofoten	Nordland	Norway
OT	NHMO-DMA-31861/1-O	M 4319	no	Delphinidae	Globicephala melas	Globicephala	melas					1865		Lofoten	Nordland	Norway
OT	NHMO-DMA-31863/1-O	M 4320	yes	Delphinidae	Lagenorhynchus acutus	Lagenorhynchus	acutus					1865				Norway
OT	NHMO-DMA-31866/1-O	M 4323	yes	Delphinidae	Lagenorhynchus acutus	Lagenorhynchus	acutus					1865		Oslofjorden		Norway
OT	NHMO-DMA-29447/1-O	4327	yes	Phocoenidae	Phocoena phocoena	Phocoena	phocoena					1865			Oslofjorden	Norway
OT	NHMO-DMA-31864/1-O	M 4321	yes	Delphinidae	Lagenorhynchus acutus	Lagenorhynchus	acutus					1865			Hedmark
OT	NHMO-DMA-31864/1-O	M 4322	yes	Delphinidae	Lagenorhynchus acutus	Lagenorhynchus	acutus					1865			Hedmark
OT	NHMO-DMA-29434/1-O	4292	yes	Phocoenidae	Phocoena phocoena	Phocoena	phocoena					1865			Hedmark
OT	NHMO-DMA-29435/1-O	4293	yes	Phocoenidae	Phocoena phocoena	Phocoena	phocoena					1865			Hedmark
OT	NHMO-DMA-29446/1-O	4317	no	Phocoenidae	Phocoena phocoena	Phocoena	phocoena					1865			Hedmark
OT	NHMO-DMA-31868/1-O	M 4325	no	Phocoenidae	Phocoena phocoena	Phocoena	phocoena					1865			Hedmark
OT	NHMO-DMA-31915/1-O	M 4450	yes	Physeteridae	Physeter macrocephalus	Physeter	macrocephalus					1866				Atlantic Ocean
OT	NHMO-DMA-31917/1-O	M 4460	yes	Delphinidae	Lagenorhynchus acutus	Lagenorhynchus	acutus					1866		Oslofjorden		Norway
OT	NHMO-DMA-31918/1-O	M 4461	yes	Delphinidae	Lagenorhynchus acutus	Lagenorhynchus	acutus					1866		Oslofjorden		Norway
OT	NHMO-DMA-31919/1-O	M 4462	yes	Delphinidae	Lagenorhynchus acutus	Lagenorhynchus	acutus					1866		Oslofjorden		Norway
OT	NHMO-DMA-31923/1-O	M 4468	yes	Delphinidae	Lagenorhynchus acutus	Lagenorhynchus	acutus					1866		Oslofjorden		Norway
OT	NHMO-DMA-31968/1-O	M 4636	yes	Delphinidae	Orcinus orca	Orcinus	orca		Juvenile			1866			Finnmark	Norway	Esmark	scientist	Cat. 1868. Fra prof. Esmarks reise.
OT	NHMO-DMA-30530/1-O	4465	yes	Phocoenidae	Phocoena phocoena	Phocoena	phocoena					1866		Oslofjorden	Oslo	Norway
OT	NHMO-DMA-30530/1-O	4466	no	Phocoenidae	Phocoena phocoena	Phocoena	phocoena					1866				Norway
OT	NHMO-DMA-30530/1-O	4467	yes	Phocoenidae	Phocoena phocoena	Phocoena	phocoena					1866				Norway
OT	NHMO-DMA-30530/1-O	4469	yes	Phocoenidae	Phocoena phocoena	Phocoena	phocoena					1866				Norway
OT	NHMO-DMA-31925/1-O	M 4471	yes	Delphinidae	Lagenorhynchus acutus	Lagenorhynchus	acutus					1866			Hedmark
OT	NHMO-DMA-31922/1-O	M 4464	no	Delphinidae	Delphinus delphis	Delphinus	delphis		Foetus	20	12	1866			Toske?
OT	NHMO-DMA-29521/1-O	4621	no	Balaenopteridae	Balaenoptera musculus	Balaenoptera	musculus					1867		Oslo	Oslo	Norway			"Captured"
OT	NHMO-DMA-31952/1-O og NHMO-DMA-29510/1-O - seems to be only one specimen	M 4565	yes	Delphinidae	Lagenorhynchus acutus	Lagenorhynchus	acutus					1867		Oslofjorden		Norway		Probably the one mentioned p 689 in Collett
OT	NHMO-DMA-31991/1-O	M 4732	no	Delphinidae	Orcinus orca	Orcinus	orca					1868				Norway
OT	NHMO-DMA-29549/1-O	4741	no	Balaenopteridae	Balaenoptera acutorostrata	Balaenoptera	acutorostrata					1868
OT	NHMO-DMA-29626/1-O	5017	no	Balaenopteridae	Balaenoptera musculus	Balaenoptera	musculus				9	1871			Finnmark	Norway	Foyn, Svend
OT	NHMO-DMA-30017/1-O	5944	yes	Delphinidae	Orcinus orca	Orcinus	orca					1873		Tromsø	Troms	Norway	Collett, Robert	scientist
OT	NHMO-DMA-29914/1-O	5407	yes	Balaenidae	Balaena mysticetus	Balaena	mysticetus					1875				Arctic Ocean	Brun, Carsten Henrik	Captain	Gift from Brun
OT	NHMO-DMA-32141/1-O	M 5417 NB KAN være samme objekt som er reg. som NHMO-DMA-55675.	no	Monodontidae	Monodon monoceros	Monodon	monoceros					1875	Nordishavet			Arctic Ocean	Brun, Carsten Henrik (Kapt.)	Captain
OT	NHMO-DMA-32263/1-O	M 5944	no	Delphinidae	Orcinus orca	Orcinus	orca					1875		Tromsø	Troms	Norway	Collett, Robert	scientist
OT	NHMO-DMA-29905/1-O	5361	yes	Phocoenidae	Phocoena phocoena	Phocoena	phocoena		juv?			1875				Norway
OT	NHMO-DMA-25157/1-O	specimen lacks museum number	no	Delphinidae	Lagenorhynchus acutus	Lagenorhynchus	acutus				5	1877		Kragerø	Telemark	Norway	Kragerø skole	School
OT	NHMO-DMA-32272/1-O	M 5974	yes	Delphinidae	Lagenorhynchus albirostris	Lagenorhynchus	albirostris					1877		Nesseby	Finnmark	Norway			K
OT	NHMO-DMA-30533/2-O = NHMO-DMA-30533/1-P	5672, 5673, 5689	no	Phocoenidae	Phocoena phocoena	Phocoena	phocoena					1877		Oslofjorden	Oslo	Norway
OT	NHMO-DMA-32222/1-O	M 5781	no	Delphinidae	Delphinus delphis	Delphinus	delphis					1878				Atlantic ocean, 49grd.51 N.13., 33grd. 45' L. o.f. Gr.			captured. [Collected date]: innlevert 1879 gj. d. Zool.mus.
OT	NHMO-DMA-30013/1-O	5938	no	Balaenopteridae	Balaenoptera acutorostrata	Balaenoptera	acutorostrata			13	9	1878	Oslofjorden		Oslo	Norway
OT	NHMO-DMA-32229/1-O	M 5795	yes	Delphinidae	Orcinus orca	Orcinus	orca					1878	Lofoten		Nordland	Norway	Fosli	telegrafdirektør	Fra telegr. direkt. Fosli v/. R. Collet.
OT	NHMO-DMA-32242/1-O	M 5813	yes	Delphinidae	Lagenorhynchus acutus	Lagenorhynchus	acutus				9	1879		Kragerø	Telemark	Norway	Fortun (skolelærer)	School teacher
OT	NHMO-DMA-31937/1-O	M 4525	no	Physeteridae	Physeter macrocephalus	Physeter	macrocephalus					1880				Atlantic Ocean
OT	NHMO-DMA-32254/1-O	M 5927	no	Physeteridae	Physeter macrocephalus	Physeter	macrocephalus				6	1880				Atlantic Ocean
OT	NHMO-DMA-32279/1-O	M 6010	yes	Delphinidae	Delphinus delphis	Delphinus	delphis					1880		Melbourne	Victoria	Australia	Carl Sophus Lumholtz	expedition guy	Captured. "sent af cand. Theol Lumhotlz fra hans reiser til Australien. Med samme sending kom skelet av Phocolantes (?) og Hypsipogommus (?). Kilde kartotekkort
OT	NHMO-DMA-30021/1-O	5954	yes	Balaenopteridae	Balaenoptera musculus	Balaenoptera	musculus				sommer	1880	Vadsø		Finnmark	Norway	Foyn, Svend
OT	NHMO-DMA-30015/1-O	5939	yes	Delphinidae	Delphinus delphis	Delphinus	delphis				10	1880	Drøbak			Norway			[Collector]: kjøp gjennom Zool. Museum. [Collecting method]: funnet på søppelhaug ved Drøbak. Også omtalt Collett p 676
OT	NHMO-DMA-32255/1-O	M 5928 a and b	yes	Physeteridae	Physeter macrocephalus	Physeter	macrocephalus				6	1880			"Duo Ainifes"??	Saint Helena, Ascension and Tristan da Cunha	Isachsen (Kapt.)	Captain
OT	NHMO-DMA-32261/1-O	M 5939	no	Delphinidae	Delphinus delphis	Delphinus	delphis					1880					"en kone" (NO: a woman or wife)
OT	NHMO-DMA-32330/1-O	M 6180	no	Monodontidae	Delphinapterus leucas	Delphinapterus	leucas					1881				Arctic Ocean	Schneider, Tromsø	conservator, Tromsø
OT	NHMO-DMA-30029/1-O	6035	yes	Balaenopteridae	Balaenoptera musculus	Balaenoptera	musculus			26	7	1881	Jarfjord		Finnmark	Norway	Evensen gift to Guldberg	Captain gift to Scientist	fra Guldbergs reiser I Finnmark 1881
OT	NHMO-DMA-30030/1-O	6036	yes	Balaenopteridae	Balaenoptera musculus	Balaenoptera	musculus				8	1881	Vadsø		Finnmark	Norway	Guldberg, G. (Sv. Foyn)	Scientist/ whaling captian
OT	NHMO-DMA-30028/1-O	6034	yes	Balaenopteridae	Megaptera novaeangliae	Megaptera	novaeangliae			26	7	1881	Jarfjord	Sør-Varanger	Finnmark	Norway	Guldberg	Scientist
OT	specimen added by LLD; no museum number	no museum number	yes		Hyperoodon ampullatus	Hyperoodon	ampullatus					1881							K
OT	NHMO-DMA-32331/1-O	M 6181	no	Monodontidae	Delphinapterus leucas	Delphinapterus	leucas					1882				Arctic Ocean	Bryde (Kapt.)	captain	gitt av Bryde
OT	NHMO-DMA-32337/1-O and NHMO-DMA-32338/1-O = same specimen stored in two places	M 6195	yes	Delphinidae	Delphinus delphis	Delphinus	delphis					1882				Atlantic Ocean	Eitzen (Kapt.) Klara av Tønsberg	Captain	[Collected date]: erhv. i sept.1882, innreg.1883.. [Preparation]: skjelett m. halefinne og ryggfinne.
OT	NHMO-DMA-32336/1-O	M 6194	no	Balaenidae	Eubalaena glacialis	Eubalaena	glacialis				8	1882	Sørøen	Hasvik	Finnmark	Norway	Guldberg (conserv.)	Scientist	found dead, unknown rearon
OT	NHMO-DMA-30042/1-O	6154	no	Balaenopteridae	Megaptera novaeangliae	Megaptera	novaeangliae					1882				Norway	Guldberg	Scientist
OT	NHMO-DMA-32314/1-O	M 6126	yes	Delphinidae	Delphinus delphis	Delphinus	delphis					1882					Isachsen (Kapt.)	Captain
OT	specimen added by LLD; not found in database	6125	yes		?Delphinus ?sp	?Delphinus	?sp					1882
OT	NHMO-DMA-32345/1-O	M 6213	yes	Delphinidae	Lagenorhynchus acutus	Lagenorhynchus	acutus					1883		Farsund	Vest-Agder	Norway
OT	NHMO-DMA-30063/1-O	6299	yes	Balaenopteridae	Balaenoptera borealis	Balaenoptera	borealis			27	11	1885		Vardø	Finnmark	Norway			K
OT	NHMO-DMA-30069/1-O = NHMO-DMA-32384/1-O	6336	no	Delphinidae	Delphinus delphis	Delphinus	delphis			8	12	1886				Atlantic Ocean			Gift - from Lillesand skole to Zool.mus
OT	NHMO-DMA-32383/1-O	M 6335	yes	Delphinidae	Delphinus delphis	Delphinus	delphis			10	11	1886	Sydhavet, 200 mil fra Sidney			Australia	Stanert (Kapt.)	Captain	Captured. [Collector]: mottatt gj. prof. Collet av kapt. Stanert, fører av skip Thor.
OT	NHMO-DMA-32389/1-O	M 6376	no	Delphinidae	Lagenorhynchus albirostris	Lagenorhynchus	albirostris				11	1887
OT	NHMO-DMA-32062/1-O	M 5	no	Phocoenidae	Phocoena phocoena	Phocoena	phocoena					1889			Hedmark
OT	NHMO-DMA-31094/1-O	M 22	yes	Delphinidae	Lagenorhynchus albirostris	Lagenorhynchus	albirostris					1890			Hedmark
OT	specimen added by LLD; no museum number	no museum number	yes		Lagenorhynchus albirostris	Lagenorhynchus	albirostris			20	3	1891
OT	NHMO-DMA-32688/1-O	M 7201	yes	Monodontidae	Delphinapterus leucas	Delphinapterus	leucas					1893	Sukkertoppen			Greenland	Bistrup
OT	NHMO-DMA-32690/1-O	M 7203	yes	Monodontidae	Delphinapterus leucas	Delphinapterus	leucas					1893	Sukkertoppen			Greenland	Bistrup
OT	NHMO-DMA-32691/1-O	M 7203 (NB two specimens?)	no	Monodontidae	Delphinapterus leucas	Delphinapterus	leucas					1893				Greenland	Bistrup
OT	NHMO-DMA-32679/1-O	M 7194	yes	Delphinidae	Globicephala melas	Globicephala	melas			22	8	1893	Repvaag, Porsanger		Finnmark	Norway	17 killed from pack of 100, 2 bought by Oslo museum. Collett p 703		K
OT	NHMO-DMA-32680/1-O	M 7195	yes	Delphinidae	Globicephala melas	Globicephala	melas			22	8	1893	Repvaag, Porsanger		Finnmark	Norway	17 killed from pack of 100, 2 bought by Oslo museum. Collett p 703		K
OT	NHMO-DMA-32443/1-O	M 6487	no	Monodontidae	Delphinapterus leucas	Delphinapterus	leucas			1	6	1894	Sukkertoppen			Greenland
OT	NHMO-DMA-32444/1-O	M 6488	yes	Monodontidae	Delphinapterus leucas	Delphinapterus	leucas			1	6	1894	Sukkertoppen			Greenland
OT	NHMO-DMA-32446/1-O	M 6490	no	Delphinidae	Orcinus orca	Orcinus	orca			1	6	1894		Sandefjord	Vestfold	Norway	Bryde (Kapt.)	Captain
OT	NHMO-DMA-32455/1-O	M 6502	yes	Phocoenidae	Phocoena phocoena	Phocoena	phocoena				6	1894	Hisken	Bømlo	Hordaland	Norway
OT	NHMO-DMA-32681/1-O	M 7196	yes	Delphinidae	Delphinus delphis	Delphinus	delphis					1895				Canada
OT	NHMO-DMA-25188/1-O	u/nr	no	Balaenopteridae	Balaenoptera borealis	Balaenoptera	borealis					1895	Mehamn	Gamvik	Finnmark	Norway	Bull, Johs.
OT	NHMO-DMA-25189/1-O	u/nr	no	Balaenopteridae	Balaenoptera physalus	Balaenoptera	physalus					1895	Mehamn	Gamvik	Finnmark	Norway	Foyn, Svend	whaling captain
OT	NHMO-DMA-32051/1-O	M 4965	yes	Monodontidae	Delphinapterus leucas	Delphinapterus	leucas					1896				Greenland
OT	NHMO-DMA-32068/1-O	M 5031	yes	Delphinidae	Orcinus orca	Orcinus	orca		juvenile			1896				Greenland
OT	NHMO-DMA-25177/1-O	u/nr	no	Physeteridae	Physeter macrocephalus	Physeter	macrocephalus					1896				Iceland	[Collector]: hvalf.selsk. "Victor", Tønsb. ded.. [Preparation]: Vf. fy.mus., Tønsb.
OT	NHMO-DMA-29316/1-O	3833	yes	Balaenopteridae	Balaenoptera physalus	Balaenoptera	physalus					1896
OT	NHMO-DMA-25181/1-O	specimen lacks museum number	yes	Ziphiidae	Hyperoodon ampullatus	Hyperoodon	ampullatus		Juvenile			1896
OT	NHMO-DMA-29583/1-O	4933	yes	Ziphiidae	Hyperoodon ampullatus	Hyperoodon	ampullatus		Juvenile			1896
OT	NHMO-DMA-32684/1-O	M 7198	yes	Delphinidae	Lagenorhynchus albirostris	Lagenorhynchus	albirostris				5	1897	Kifjord, Kjøllefjord	Lebesby	Finnmark	Norway	Stenersen, R.		Flokk fanget og drept.Museet erhvervet seg kranier. Kilde Collett p 682
OT	NHMO-DMA-32466/1-O	M 6525	no	Phocoenidae	Phocoena phocoena	Phocoena	phocoena			9	3	1897			Hedmark
OT	NHMO-DMA-30084/1-O	6525	yes	Phocoenidae	Phocoena phocoena	Phocoena	phocoena			9	3	1897
OT	specimen added by LLD; no museum number	no museum number	yes		Delphinapterus leucas	Delphinapterus	leucas					1898	Bistrup	Sukkertoppen		Greenland
OT	NHMO-DMA-32685/1-O	M 7199	yes	Delphinidae	Lagenorhynchus albirostris	Lagenorhynchus	albirostris			29	3	1899	Kifjord, Kjøllefjord	Lebesby	Finnmark	Norway			[Collecting method]: flokk fanget og drept. Flokk fanget og drept.Museet erhvervet seg kranier. Kilde Collett p 682
OT	NHMO-DMA-32682/1-O = NHMO-DMA-32683/1-O	M 7197	yes	Delphinidae	Delphinus delphis	Delphinus	delphis					1899			St. Helena	Saint Helena, Ascension and Tristan da Cunha
OT	NHMO-DMA-25191/1-O	u/nr	no	Balaenopteridae	Balaenoptera musculus	Balaenoptera	musculus					1900				Iceland	Brd Bull ded
OT	NHMO-DMA-32689/1-O	M 7202	yes	Monodontidae	Monodon monoceros	Monodon	monoceros		Foetus			1901				Jan Mayen	Amundsen, Roald	Expedition guy
OT	NHMO-DMA-25186/1-O	specimen lacks museum number	no	Balaenidae	Eubalaena glacialis	Eubalaena	glacialis					1902				Iceland	Brd Bull ded
OT	NHMO-DMA-25180/1-O	specimen lacks museum number	no	Ziphiidae	Hyperoodon ampullatus	Hyperoodon	ampullatus					1902				Iceland	Brd Bull ded
OT	NHMO-DMA-30240/1-O	7165	yes	Balaenopteridae	Balaenoptera physalus	Balaenoptera	physalus					1904	Mjøfjord			Iceland
OT	NHMO-DMA-30241/1-O	7166	yes	Balaenopteridae	Balaenoptera physalus	Balaenoptera	physalus				8	1904	Mjøfjord			Iceland
OT	NHMO-DMA-30237/1-O	7162	yes	Balaenopteridae	Megaptera novaeangliae	Megaptera	novaeangliae					1904				Iceland	E.
OT	specimen added by LLD; no museum number	no museum number	yes		Physeter macrocephalus	Physeter	macrocephalus					1904				Iceland
OT	specimen added by LLD; no museum number	no museum number	yes		Physeter macrocephalus	Physeter	macrocephalus					1904				Iceland
OT	NHMO-DMA-32468/1-O	M 6533	yes	Monodontidae	Delphinapterus leucas	Delphinapterus	leucas			26	2	1904	Vardø		Finnmark	Norway			[mass "invasion" of belugas along Norw coast 1902-1904, probably related to this. Collett p 663]
OT	NHMO-DMA-32469/1-O	M 6534	yes	Monodontidae	Delphinapterus leucas	Delphinapterus	leucas		Juvenile	26	2	1904		Vardø	Finnmark	Norway
OT	specimen added by LLD; no museum number	no museum number	yes		Megaptera novaeangliae	Megaptera	novaeangliae					1905			?Mocamedes, Angola (had Norwegian whaling) - hard to interpret writing though	Angola
OT	NHMO-DMA-30238/1-O	7163	yes	Balaenopteridae	Balaenoptera physalus	Balaenoptera	physalus				7	1905	Mjøfjord			Iceland
OT	NHMO-DMA-30239/1-O	7164	yes	Balaenopteridae	Balaenoptera physalus	Balaenoptera	physalus				7	1905	Mjøfjord			Iceland
OT	specimen added by LLD; not found in database	NHMO-DMA-56991/1-0	yes sample 29.08.22		Balaena mysticetus	Balaena	mysticetus			8	6	1905	Akershus, Bærum, Lysaker			Norway
OT	specimen added by LLD; no museum number	no museum number	yes		Lagenorhynchus acutus	Lagenorhynchus	acutus			2	3	1905
OT	specimen added by LLD; not found in database	specimen lacks museum number	yes	Delphinidae	Orcinus orca	Orcinus	orca					1907	Bergensfjord		Hordaland	Norway
OT	specimen added by LLD; no museum number	no museum number	yes		Eubalaena glacialis	Eubalaena	glacialis				7	1908				Hebrides
OT	specimen added by LLD; no museum number	no museum number	yes		Eubalaena glacialis	Eubalaena	glacialis					1908				Hebrides
OT	specimen added by LLD; no museum number	no museum number	yes		Physeter macrocephalus	Physeter	macrocephalus					1908				Hebrides
OT	specimen added by LLD; no museum number	no museum number	yes		Physeter macrocephalus	Physeter	macrocephalus					1908				Hebrides
OT	specimen added by LLD; no museum number	no museum number	yes		Physeter macrocephalus	Physeter	macrocephalus					1908				Hebrides
OT	specimen added by LLD; no museum number	no museum number	yes		Physeter macrocephalus	Physeter	macrocephalus					1908				Hebrides
OT	NHMO-DMA-32687/1-O	M 7200	yes	Delphinidae	Lagenorhynchus albirostris	Lagenorhynchus	albirostris		juvenile + adult?	26	4	1910	Gamvik, Bugøynes, Varangerfjorden		Finnmark	Norway			Collett p 682: unge fanget utenfor Gamvik, craniet send til museet I Oslo.
OT	specimen added by LLD; no museum number	no museum number	yes		Megaptera novaeangliae	Megaptera	novaeangliae					1911			Mossamedes - probably Mocamedes, Angola (had N whaling station)	Angola
OT	specimen added by LLD; no museum number	no museum number	yes		Balaenoptera	Balaenoptera						1911				Falkland Islands + ulseselig
OT	specimen added by LLD; no museum number	no museum number	yes		Megaptera novaeangliae	Megaptera	novaeangliae					1911			Kergeulen	Indian Ocean
OT	specimen added by LLD; no museum number	no museum number	yes		Balaenoptera	Balaenoptera						1911			Kergeulen	Indian Ocean
OT	specimen added by LLD; not found in database nor corema	specimen lacks museum number	yes		Balaenoptera brydei	Balaenoptera	brydei		Adult	15	11	1912	Durban			South Africa	Ørjan Olsen	Zoologist/ expedition guy
OT	NHMO-DMA-55071/1-O	22057	no		? ?	?	?			1	1	1935			Svalbard	Svalbard	Jensen, Torstein	"Hvirvel funnet på strand" inntaksjournal says registered in 2012, found 1935
OT	NHMO-DMA-55072/1-O	22058	no		? ?	?	?			1	1	1935			Svalbard	Svalbard	Jensen, Torstein	"Hvirvel funnet på strand" inntaksjournal says registered in 2012, found 1935
OT	NHMO-DMA-34974/1-O	155-64	yes	Balaenopteridae	Balaenoptera physalus	Balaenoptera	physalus			31	8	1964			Oslo	Norway	Larsen, Sigmund
OT	NHMO-DMA-35513/1-O	1964-68	yes	Monodontidae	Delphinapterus leucas	Delphinapterus	leucas			34	7	1964		Hurum	Buskerud	Norway	Mörk, August	fisker
OT	NHMO-DMA-34831/1-O	14-73	yes	Phocoenidae	Phocoena phocoena	Phocoena	phocoena			11	7	1973	Husvikholmen	Frogn	Akershus	Norway	Pedersen, Jørgen A.		Found dead, unknwon reason. [Collecting method]: funnet død - råtten. Har antagelig ligget ca. en uke i varmen. (Foto. Notat.)
OT	NHMO-DMA-33943/1-O	4-83	no	Phocoenidae	Phocoena phocoena	Phocoena	phocoena				3	1983	Steinsgrenda	Averøy	Møre og Romsdal	Norway	Rånes, E.
OT	NHMO-DMA-33944/1-O	4-83	no	Phocoenidae	Phocoena phocoena	Phocoena	phocoena				3	1983	Steinsgrenda	Averøy	Møre og Romsdal	Norway	Rånes, Einar
OT	NHMO-DMA-39666/1-O	92-03	yes	Phocoenidae	Phocoena phocoena	Phocoena	phocoena			22	5	1992	Kjeholmen	Bærum	Akershus	Norway	Westereng, Gudmund / Semb, Knut		[Preparation]: ? lå død i strandkanten. Anm.: hadde ligget død i lengre tid.
OT	NHMO-DMA-43764/1-O	11596	yes	Delphinidae	Stenella coeruleoalba	Stenella	coeruleoalba			20	5	1999	Kråkstadfjorden	Råde	Østfold	Norway	Båtvik, J. Ingar I. / Hansen, Bjørn
OT	specimen added by LLD; not found in database	NHMO-DMA-56990/1-0	yes sample 29.08.22		Megaptera novaeangliae	Megaptera	novaeangliae					1999	Båtsfjord, Hamningberg		Finnmark	Norway
OT	specimen added by LLD; not found in database	NHMO-DMA-56988/1-0	yes		Balaena mysticetus	Balaena	mysticetus					2004	Thule, NW Greenland			Greenland
OT	NHMO-DMA-55632/1-O		no	Balaenidae	Balaena mysticetus	Balaena	mysticetus					2005		Iqualuit	Nunavut	Canada	Born, Erik
OT	NHMO-DMA-55633/1-O		no	Balaenidae	Balaena mysticetus	Balaena	mysticetus					2005		Iqualuit	Nunavut	Canada	Born, Erik
OT	NHMO-DMA-43826/1-O	11816	yes	Phocoenidae	Phocoena phocoena	Phocoena	phocoena		Juvenile	3	5	2005		Malmøyskjær	Oslo	Norway	Lorentz, Astrid		Found dead, unknown reason
OT	NHMO-DMA-43827/1-O	11816	no	Phocoenidae	Phocoena phocoena	Phocoena	phocoena		Juvenile	3	5	2005				Norway	Westereng, Gudmund		Stranded. Found dead, unknown reason
OT	NHMO-DMA-55634/1-O		no		? ?	?	?					2007		Nitelva	Hakadal	Norway	Aandstad, Sigurd	"Halvt nedgravd i jorda; gammel søppelfyllplass? Noe hageavfall i nærheten. Innlevert med forespørsel om hvilken arft av hval beinfragmentene har tilhørt. Finner: Sigurd Aandstad, Ulvefaret 100, 1488 Hakadal, tlf. 90204574"
OT	NHMO-DMA-46137/1-O	14130	yes	Delphinidae	Lagenorhynchus albirostris	Lagenorhynchus	albirostris			1	7	2008	Malmøya		Oslo	Norway	Westereng, Gudmund
OT	NHMO-DMA-46575/1-O	14567	yes	Balaenidae	Balaena mysticetus	Balaena	mysticetus					2009				Norway	Sysselmannen	Management
OT	NHMO-DMA-55133/2-O	22117	yes	Delphinidae	Lagenorhynchus acutus	Lagenorhynchus	acutus			14	6	2015	Engelsviken	Fredrikstad	Østfold	Norway	Dahlen, Pia Ve	Biologist	found dead
OT	specimen added by LLD; no museum number	no museum number	yes		Eubalaena glacialis	Eubalaena	glacialis				7	1902 (1908?)				Hebrides
OT	NHMO-DMA-29313/1-O	3831	yes	Balaenopteridae	Balaenoptera borealis	Balaenoptera	borealis					indf 1896
OT	specimen added by LLD; no museum number	no museum number	yes		Megaptera novaeangliae	Megaptera	novaeangliae								?Mocamedes, Angola (had Norwegian whaling) - hard to interpret writing though	Angola
OT	specimen added by LLD; no museum number	no museum number	yes		Megaptera novaeangliae	Megaptera	novaeangliae								Mossa(…) - probably Mocamedes, Angola (had N whaling station)	Angola
OT	specimen added by LLD; no museum number	no museum number	yes		Delphinus delphis	Delphinus	delphis						Sydney Harbour, NS Wales			Australia	Seele og Johansen
OT	NHMO-DMA-32139/1-O	M 5408 NB KAN være samme objekt som er reg. som NHMO-DMA-55675.	no	Monodontidae	Monodon monoceros	Monodon	monoceros									Greenland	Brun, Carsten Henrik (Kapt.)	Captain
OT	specimen added by LLD; not found in database	NHMO-DMA-56987/1-0	yes sample 29.08.22		Balaena mysticetus	Balaena	mysticetus						Young Sund, NE Greenland			Greenland
OT	specimen added by LLD; not found in database	NHMO-DMA-56986/1-0	yes sample 29.08.22		Balaena mysticetus	Balaena	mysticetus						Young Sund, NE Greenland			Greenland
OT	NHMO-DMA-27808/1-O	1664	yes	Delphinidae	Lagenorhynchus acutus	Lagenorhynchus	acutus							Oslofjorden	Oslo	Norway
OT	NHMO-DMA-25159/1-O	specimen lacks museum number	no	Delphinidae	Orcinus orca	Orcinus	orca						Oslofjorden		Oslo	Norway	Collett, Robert	scientist
OT	specimen added by LLD; not found in database	NHMO-DMA-56985/1-0	yes sample 29.08.22		Balaena mysticetus	Balaena	mysticetus						Nordenskiöld Land, Bolter			Svalbard
OT	specimen added by LLD; not found in database	NHMO-DMA-56989/1-0	yes sample 29.08.22		Balaena mysticetus	Balaena	mysticetus						Barentsøya, Mistakodden			Svalbard
OT	NHMO-DMA-29625/1-O	5017	yes	Balaenopteridae	Balaenoptera acutorostrata	Balaenoptera	acutorostrata								Hedmark
OT	NHMO-DMA-31921/1-O	M 4464	yes	Delphinidae	Delphinus delphis	Delphinus	delphis								Hedmark
OT	NHMO-DMA-25187/1-O	u/nr	no	Balaenidae	Balaena mysticetus	Balaena	mysticetus
OT	NHMO-DMA-29315/1-O	3832	yes	Balaenopteridae	Balaenoptera musculus	Balaenoptera	musculus
OT	NHMO-DMA-30756/1-O	M 1498	yes	Balaenopteridae	Balaenoptera musculus	Balaenoptera	musculus
OT	NHMO-DMA-31734/1-O	M 3833	no	Balaenopteridae	Balaenoptera physalus	Balaenoptera	physalus
OT	specimen added by LLD; not found in database - could be NHMO-DMA-25176/1-O??	unummerert	yes	Monodontidae	Delphinapteras leucas	Delphinapteras	leucas
OT	NHMO-DMA-25176/1-O	u/nr	no	Monodontidae	Delphinapterus leucas	Delphinapterus	leucas
OT	NHMO-DMA-32692/1-O	M 7204	no	Monodontidae	Delphinapterus leucas	Delphinapterus	leucas
OT	specimen added by LLD; not found in database	7205	yes	Monodontidae	Delphinateras leucas	Delphinapterus	leucas
OT	specimen added by LLD; not found in database	specimen lacks museum number	yes	Delphinidae	Delphinus delphis	Delphinus	delphis
OT	NHMO-DMA-55121/1-O	22105	yes	Balaenidae	Eubalaena glacialis	Eubalaena	glacialis
OT	NHMO-DMA-30741/1-O	M 1479	yes	Delphinidae	Globicephala melas	Globicephala	melas
OT	specimen added by LLD; not found in database	specimen lacks museum number	yes	Delphinidae	Orcinus orca	Orcinus	orca
OT	specimen added by LLD; not found in database	specimen lacks museum number	yes	Delphinidae	Orcinus orca	Orcinus	orca
OT	NHMO-DMA-25162/1-O	specimen lacks museum number	no	Delphinidae	Orcinus orca	Orcinus	orca
OT	NHMO-DMA-32677/1-O	M 7192	yes	Delphinidae	Orcinus orca	Orcinus	orca
OT	NHMO-DMA-32678/1-O	M 7193	yes	Delphinidae	Orcinus orca	Orcinus	orca
OT	specimen added by LLD; not found in database	389 = 390(?)	yes	Delphinidae	Orcinus orca	Orcinus	orca
OT	specimen added by LLD; not found in database	specimen lacks museum number	yes	Delphinidae	Orcinus orca	Orcinus	orca
OT	specimen added by LLD; not found in database	specimen lacks museum number	yes	Delphinidae	Orcinus orca	Orcinus	orca
OT	specimen added by LLD; not found in database	CN248	yes		Physeter macrocephalus	Physeter	macrocephalus
OT	specimen added by LLD; not found in database	no museum number	yes		Delphinapterus leucas	Delphinapterus	leucas
OT	specimen added by LLD; no museum number	no museum number	yes		Megaptera novaeangliae	Megaptera	novaeangliae
OT	specimen added by LLD; no museum number	no museum number	yes		Megaptera novaeangliae	Megaptera	novaeangliae
OT	specimen added by LLD; no museum number	no museum number	yes		Eubalaena glacialis	Eubalaena	glacialis
OT	specimen added by LLD; no museum number	no museum number	yes		Eubalaena glacialis	Eubalaena	glacialis
OT	specimen added by LLD; no museum number	no museum number	yes		Megaptera novaeangliae	Megaptera	novaeangliae
OT	specimen added by LLD; no museum number	no museum number	yes		Megaptera novaeangliae	Megaptera	novaeangliae
OT	specimen added by LLD; no museum number	no museum number	yes		Megaptera novaeangliae	Megaptera	novaeangliae
OT	specimen added by LLD; no museum number	no museum number	yes		Megaptera novaeangliae	Megaptera	novaeangliae
OT	specimen added by LLD; no museum number	no museum number	yes		Megaptera novaeangliae	Megaptera	novaeangliae
OT	specimen added by LLD; no museum number	no museum number	yes		Physeter macrocephalus	Physeter	macrocephalus
OT	specimen added by LLD; no museum number	no museum number	yes		?Delphinapterus ?leucas	?Delphinapterus	?leucas
OT	specimen added by LLD; uncertain numbering	34 - 34/01??	yes		Phocoena	Phocoena
OT	specimen added by LLD; uncertain numbering	40/01	yes		?Phocoena	?Phocoena
OT	specimen added by LLD; not found in database	10993 (43/01)	yes		?Phocoena	?Phocoena
OT	specimen added by LLD; not found in database	1990-29	yes		Phocoena phocoena	Phocoena	phocoena
OT	specimen added by LLD; not found in database	10785	yes		Phocoena phocoena	Phocoena	phocoena
OT	specimen added by LLD; not found in database	39/01	yes		?Phocoena	?Phocoena
OT	specimen added by LLD; not found in database	5281	yes		Orcinus orca	Orcinus	orca
OT	specimen added by LLD; no museum number	no museum number	yes		Orcinus orca	Orcinus	orca
OT	specimen added by LLD; no museum number	no museum number	yes		Lagenorhynchus albirostris	Lagenorhynchus	albirostris
OT	specimen added by LLD; no museum number	no museum number	yes		Lagenorhynchus acutus	Lagenorhynchus	acutus
OT	specimen added by LLD; not found in database	4496	yes		?Lagenorhynchus ?acutus	?Lagenorhynchus	?acutus
OT	specimen added by LLD; no museum number	no museum number	yes		?Lagenorhynchus ?acutus	?Lagenorhynchus	?acutus
OT	specimen added by LLD; no museum number	no museum number	yes		Delphinus	Delphinus
OT	specimen added by LLD; not found in database	47/01	yes		Phocoena	Phocoena
OT	specimen added by LLD; not found in database	10	yes		Phocoena phocoena	Phocoena	phocoena
OT	specimen added by LLD; not found in database	1/00	yes		Phocoena phocoena	Phocoena	phocoena
OT	specimen added by LLD; not found in database - might belong to other ost specimen	47A	yes		Delphinus delphis	Delphinus	delphis		foetus
WF	NHMO-DMA-35664/2-P	1991-38	no	Balaenopteridae	Balaenoptera acutorostrata	Balaenoptera	acutorostrata	Female	Juvenile	17	9	1991	Bunnefjorden		Akershus	Norway	Tiedemand-Johannesen, P.		druknet med garn i kjeften 1-2 uker tidligere.
WF	specimen added by LLD; not found in database	"Foster fra vågehval nr 18" LLD: don’t know whether 18 is mother or offspring	yes		Balaenoptera acutorostrata	Balaenoptera	acutorostrata	M	foetus	17	6	43 (don’t know which - probably 1943)
WF	NHMO-DMA-29945/1-P	5552	no	Phocoenidae	Phocoena phocoena	Phocoena	phocoena	Male	Foetus			1876		Oslofjorden	Oslo	Norway	Handelsmand Bull - p 71 in gift journal	Handelsmann	GIFT [Register no]: (=5553penis 5554larynx 5555ventr.) notater.. [Preparation]: nyrerne med lidt af uretererne.
WF	NHMO-DMA-30031/1-P	6054	yes	Balaenopteridae	Balaenoptera musculus	Balaenoptera	musculus	Male	Foetus			1881	Varangerfjorden	Vadsø	Finnmark	Norway	Guldberg, G. (Sv. Foyn)	scientist
WF	NHMO-DMA-29943	5544	yes		Monodon monoceros	Monodon	monoceros	Male	foetus				Prince Regent Inlet		Nunavut	Canada
WF	NHMO-DMA-32065/1-P	M 5028	no	Balaenopteridae	Balaenoptera physalus	Balaenoptera	physalus		Foetus		9	1871			Finnmark	Norway	Foyen, S.	whaling captain	GIFT - in giftprotocol 1870-1879 p 30 "innsendt 1872"
WF	NHMO-DMA-29929/1-P	5464	no	Phocoenidae	Phocoena phocoena	Phocoena	phocoena		Foetus			1876				Norway			K
WF	NHMO-DMA-29931/1-P	5469	no	Phocoenidae	Phocoena phocoena	Phocoena	phocoena		Foetus			1876				Norway			K
WF	NHMO-DMA-29932/1-P	5469	no	Phocoenidae	Phocoena phocoena	Phocoena	phocoena		Foetus			1876				Norway			K
WF	NHMO-DMA-29074/1-P	3298	no	Phocoenidae	Phocoena phocoena	Phocoena	phocoena		Foetus		1	1879			Hedmark
WF	specimen added by LLD; not found in database	6164	yes		Balaenoptera musculus	Balaenoptera	musculus		foetus		5	1882			Vardø	Norway	Sørensen	Captain	G "givet af capt. G. Sørensen"
WF	specimen added by LLD; not found in database	6192	yes		Balaenoptera ?musculus	Balaenoptera	?musculus		foetus	17	5	1883			Vardø	Norway
WF	NHMO-DMA-30062/1-P	6295	yes	Balaenopteridae	Balaenoptera borealis	Balaenoptera	borealis		Foetus		12	1885					Bull, M. (Kapt.)	Captain
WF	NHMO-DMA-28579/1-P	2394 [assume this is = 3294]	yes	Ziphiidae	Hyperoodon ampullatus	Hyperoodon	ampullatus		Foetus			1887			Ishavet	Arctic Ocean
WF	specimen added by LLD; not found in database	Nr. 38	yes		Delphinus	Delphinus	?		foetus			1888
WF	NHMO-DMA-29068/1-P	3291 specimen lacks museum number	yes	Ziphiidae	Hyperoodon ampullatus	Hyperoodon	ampullatus		Foetus	14	5	1889	Ishavet 67'N 8'V		Ishavet	Arctic Ocean	Castberg	mentioned in Collett p 649 xx
WF	NHMO-DMA-29069/1-P	3292 specimen lacks museum number	yes	Ziphiidae	Hyperoodon ampullatus	Hyperoodon	ampullatus		Foetus	14	5	1889	Ishavet 67'N 8'V		Ishavet	Arctic Ocean	Castberg	mentioned in Collett p 649 xx
WF	NHMO-DMA-29075/1-P	3299	yes	Phocoenidae	Phocoena phocoena	Phocoena	phocoena		Foetus	1	3	1889	Onsø	Fredrikstad	Østfold	Norway
WF	NHMO-DMA-29071/1-P	3295 specimen lacks museum number	yes	Monodontidae	Delphinapterus leucas	Delphinapterus	leucas		Foetus			1890			Ishavet	Arctic Ocean	Tr.mus.	Museum
WF	NHMO-DMA-29072/1-P	3296 specimen lacks museum number	yes	Monodontidae	Delphinapterus leucas	Delphinapterus	leucas		Foetus			1890			Ishavet	Arctic Ocean	Tr.mus.	Museum
WF	NHMO-DMA-29070/1-P	3293 specimen lacks museum number	yes	Ziphiidae	Hyperoodon ampullatus	Hyperoodon	ampullatus		Foetus	16	7	1890				Faeroe Islands	Monsen
WF	NHMO-DMA-29078/1-P	3302	yes	Balaenopteridae	Balaenoptera physalus	Balaenoptera	physalus		Foetus		5	1890		Vardø	Finnmark	Norway	Grønn
WF	specimen added by LLD; no museum number	no museum number	yes		?Balaenoptera ?musculus	?Balaenoptera	?musculus		foetus			1890			Skarøy	Norway
WF	NHMO-DMA-29085/1-P	3309	yes	Balaenopteridae	Balaenoptera sp.	Balaenoptera	sp.		Foetus	30	4	1895		Vardø	Finnmark	Norway	Castberg
WF	NHMO-DMA-29079/1-P	3303. specimen lacks museum number	yes	Balaenopteridae	Balaenoptera physalus	Balaenoptera	physalus		Foetus	21	4	1896		Vardø	Finnmark	Norway	"Sør"
WF	NHMO-DMA-29073/1-P	3297 specimen lacks museum number	yes	Monodontidae	Delphinapterus leucas	Delphinapterus	leucas		Foetus			1898			Sukkertopp	Greenland
WF	NHMO-DMA-29076/1-P	3300	yes	Phocoenidae	Phocoena phocoena	Phocoena	phocoena		Foetus	13	3	1903		Vardø	Finnmark	Norway	Dahl
WF	NHMO-DMA-25190/1-P	u/nr	no	Balaenopteridae	Balaenoptera musculus	Balaenoptera	musculus		Foetus	5	6	1905			Mjøfjord	Iceland	Ellefsen	hvalfanger
WF	NHMO-DMA-29086/1-P	3310	yes	Balaenopteridae	Balaenoptera musculus	Balaenoptera	musculus		Foetus	7	6	1905			Mjøfjord	Iceland	Ellefsen	hvalfanger
WF	NHMO-DMA-29088/1-P	3312	yes	Balaenopteridae	Megaptera novaeangliae	Megaptera	novaeangliae		Foetus	14	8	1905	Mjøfjord			Iceland	Ellefsen	hvalfanger
WF	NHMO-DMA-29095/1-P	3319	ye	Balaenopteridae	Balaenoptera musculus	Balaenoptera	musculus		Foetus			1905			South Georgia	South Georgia and the South Sandwich Islands
WF	NHMO-DMA-29096/1-P	3320	yes	Balaenopteridae	Megaptera novaeangliae	Megaptera	novaeangliae		Foetus			1905				South Georgia and the South Sandwich Islands
WF	NHMO-DMA-29080/1-P	3304	yes	Balaenopteridae	Balaenoptera physalus	Balaenoptera	physalus		Foetus	17	4	1906		Vardø	Mjøafjord	Iceland
WF	NHMO-DMA-29087/1-P	3311 specimen lacks museum number	yes	Balaenopteridae	Megaptera novaeangliae	Megaptera	novaeangliae		Foetus	30	6	1906	Mjøfjord			Iceland	Ellefsen	hvalfanger
WF	NHMO-DMA-29089/1-P	3313 specimen lacks museum number	yes	Balaenopteridae	Megaptera novaeangliae	Megaptera	novaeangliae		Foetus	15	12	1906	Cumberland bay		South Georgia	South Georgia and the South Sandwich Islands	Petersen (Styrm.)	Styrmann
WF	NHMO-DMA-29094/1-P	3318	yes	Balaenopteridae	Balaenoptera sp.	Balaenoptera	sp.		Foetus			1908			Finnmark	Norway			G
WF	NHMO-DMA-29081/1-P	3305	yes	Balaenopteridae	Balaenoptera physalus	Balaenoptera	physalus		Foetus	23	4	1910			20 mil utenfor Islands østkyst	Iceland
WF	NHMO-DMA-29099/1-P	3323	yes	Balaenopteridae	Megaptera novaeangliae	Megaptera	novaeangliae		Foetus	20	6	1910			24 utenfor Islands østkyst	Iceland
WF	NHMO-DMA-29097/1-P	3321	yes	Balaenopteridae	Megaptera novaeangliae	Megaptera	novaeangliae		Foetus		4	1910			South Georgia	South Georgia and the South Sandwich Islands	Sandberg
WF	NHMO-DMA-29090/1-P	3314 specimen lacks museum number	yes	Balaenopteridae	Balaenoptera sp.	Balaenoptera	sp.		Foetus		10	1911	Grytviken		Grytviken	South Georgia and the South Sandwich Islands	Larsen, C. A.	captain, participant Nordenskiölds expedition to South Shetland & South Georgia, whaling company owner, the first in the south
WF	NHMO-DMA-29091/1-P	3315 specimen lacks museum number	yes	Balaenopteridae	Balaenoptera sp.	Balaenoptera	sp.		Foetus		10	1911	Grytviken			South Georgia and the South Sandwich Islands	Larsen, C. A.	captain, participant Nordenskiölds expedition to South Shetland & South Georgia, whaling company owner, the first in the south
WF	NHMO-DMA-29092/1-P	3316 specimen lacks museum number	yes	Balaenopteridae	Balaenoptera sp.	Balaenoptera	sp.		Foetus		10	1911	Grytviken			South Georgia and the South Sandwich Islands	Larsen, C. A.	captain, participant Nordenskiölds expedition to South Shetland & South Georgia, whaling company owner, the first in the south
WF	NHMO-DMA-29077/1-P	3301	yes	Phocoenidae	Phocoena phocoena	Phocoena	phocoena		Foetus	16	3	1912	Kjøllefjord	Lebesby	Finnmark	Norway
WF	NHMO-DMA-29100/1-P	3324	yes	Balaenopteridae	Balaenoptera physalus	Balaenoptera	physalus		Foetus			1938				South Georgia and the South Sandwich Islands			Gift from Hr. Nissen 1/7-1938
WF	NHMO-DMA-29098/1-P	3322	yes	Balaenopteridae	Megaptera novaeangliae	Megaptera	novaeangliae		Foetus			1938			South Georgia	South Georgia and the South Sandwich Islands			G
WF	specimen added by LLD; not found in database		yes		Balaenoptera physalus	Balaenoptera	physalus		foetus			1950/51
WF	specimen added by LLD; not found in database	"Foster Hvalnr 1317" LLD: don’t know whether 1317 is mother or offspring	yes		Balaenoptera physalus	Balaenoptera	physalus		foetus	13	2	1953-54
WF	specimen added by LLD; not found in database	"Foster Hvalnr 1216" LLD: don’t know whether 1216 is mother or offspring	yes		Balaenoptera physalus	Balaenoptera	physalus		foetus	8	2	1953-54
WF	specimen added by LLD; not found in database	"Vågehval nr 2"	yes		Balaenoptera acutorostrata	Balaenoptera	acutorostrata		foetus	7	5	43 (don’t know which - probably 1943)
WF	specimen added by LLD; not found in database	"Foster fra vågehval nr 4417" LLD: don’t know whether 4417 is mother or offspring	yes		Balaenoptera acutorostrata	Balaenoptera	acutorostrata		foetus	18	4	44 (don’t know which-probably 1944)
WF	specimen added by LLD; not found in database	"Foster fra vågehval nr 449" LLD: don’t know whether 449 is mother or offspring	yes		Balaenoptera acutorostrata	Balaenoptera	acutorostrata		foetus	13	4	44 (don’t know which-probably 1944)
WF	NHMO-DMA-29083/1-P	3307 specimen lacks museum number	yes	Balaenopteridae	Balaenoptera physalus	Balaenoptera	physalus		Foetus						Mjøafjord	Iceland	Hans Ellefsen	hvalfanger	"Til prof. Collett"
WF	NHMO-DMA-25163/1-P	u/nr	no	Delphinidae	Orcinus orca	Orcinus	orca		Foetus				Bildøystrømmen	Fjell	Hordaland	Norway			K
WF	specimen added by LLD; no museum number	no museum number	yes		?Megaptera ?novangliae	?Megaptera	?novangliae		foetus							South Georgia and the South Sandwich Islands		Gift (?) E. Teisner Ekebergvn.22
WF	NHMO-DMA-29082/1-P	3306 specimen lacks museum number	yes	Balaenopteridae	Balaenoptera physalus	Balaenoptera	physalus		Foetus						Shetland Island	United Kingdom	Mathisen		"Til prof. Collett"?
WF	NHMO-DMA-29093/1-P	3317	yes	Phocoenidae	Phocoena phocoena	Phocoena	phocoena		Foetus - twins						Hedmark
WF	NHMO-DMA-30501/1-P	8240	yes	Balaenopteridae	? ?	?	?		Foetus								Slottsvik, Oskar (Kapt.)	Captain
WF	specimen added by LLD; not found in database	6227	yes		Megaptera novaeangliae	Megaptera	novaeangliae		foetus				unreadable note
WF	specimen added by LLD; not found in database	6033	yes		Balaenoptera musculus	Balaenoptera	musculus		foetus
WF	specimen added by LLD; no museum number	no museum number	yes		Balaenoptera ?musculus	Balaenoptera	?musculus		foetus
WF	specimen added by LLD; not found in database	6240	yes		Phocoena phocoena	Phocoena	phocoena		foetus
WF	specimen added by LLD; not found in database	5943	yes		Delphinapterus leucas	Delphinapterus	leucas		foetus
WF	specimen added by LLD; not found in database	5287	yes		Delphinus delphis	Delphinus	delphis		foetus								Did. Aasland	captain
WF	specimen added by LLD; not found in database	6007	yes		Balaenoptera musculus	Balaenoptera	musculus
WF	specimen added by LLD; not found in database	6324	yes		Hyperoodon ampullatus	Hyperoodon	ampullatus		foetus
WO	NHMO-DMA-28860/1-P	2612	no	Phocoenidae	Phocoena phocoena	Phocoena	phocoena	Female				1855
WO	NHMO-DMA-30045/1-P	6174	yes	Balaenopteridae	Balaenoptera ?physalus	Balaenoptera	?physalus	Female		24	7	1882		Vardø	Finnmark	Norway	Guldberg	scientist
WO	NHMO-DMA-31353/1-P	M 3031	no	Balaenopteridae	Balaenoptera musculus	Balaenoptera	musculus	Female		7	7	1882					Guldberg	scientist	Fra conserv. Guldbergs reise 1882.
WO	NHMO-DMA-31372/1-P	M 3086	yes	Balaenopteridae	Balaenoptera musculus	Balaenoptera	musculus	Female				1883			Finnmark	Norway	Guldberg	scientist	fra conserv, Guldbergs reise 1883
WO	NHMO-DMA-31401/1-P	M 3143	no	Balaenopteridae	Balaenoptera musculus	Balaenoptera	musculus	Female		17	7	1883		Vardø	Finnmark	Norway	Guldberg	scientist	fra conserv, Gudbergs reise 1883
WO	NHMO-DMA-29084/1-P	3308	yes	Balaenopteridae	Balaenoptera physalus	Balaenoptera	physalus	Female			9	1939			Harøy	Norway
WO	NHMO-DMA-30024/1-P = NHMO-DMA-30033/1-P	6001 = 6057	no	Phocoenidae	Phocoena phocoena	Phocoena	phocoena	Male		22	12	1880		Hvaler	Østfold	Norway	Michelsen, Ole		Shot. [Preparation]: a:) encephalon b:) medulla spinalis. [Collecting method]: skudt af Ole Michelsen, Engelsviken. Tykkelse: 960mm.
WO	NHMO-DMA-38598/1-P = NHMO-DMA-30018/1-P	5947-49	no	Phocoenidae	Phocoena phocoena	Phocoena	phocoena	Male		5	11	1880		Fredrikstad	Østfold	Norway	Michelsen, Ole		K
WO	NHMO-DMA-30035/1-P	6074	no	Balaenopteridae	Balaenoptera musculus	Balaenoptera	musculus	Male				1882		Vadsø	Finnmark	Norway
WO	NHMO-DMA-28528/1-P	2344	no	Balaenopteridae	Balaenoptera acutorostrata	Balaenoptera	acutorostrata					1854			Hedmark		Esmark	professor	gift from Esmark
WO	NHMO-DMA-28790/1-P	2548	no	Phocoenidae	Phocoena phocoena	Phocoena	phocoena					1855			Kattegat	Denmark	Eschricht (prof.)	Scientist
WO	NHMO-DMA-28422/1-P	2252	no	Phocoenidae	Phocoena phocoena	Phocoena	phocoena					1855			Kattegat	Norway
WO	NHMO-DMA-28793/1-P	2551	no	Phocoenidae	Phocoena phocoena	Phocoena	phocoena					1855			Kattegat	Norway
WO	NHMO-DMA-28798/1-P	2554	no	Phocoenidae	Phocoena phocoena	Phocoena	phocoena					1855		Oslofjorden	Oslo	Norway
WO	NHMO-DMA-28796/1-P	2553	no	Phocoenidae	Phocoena phocoena	Phocoena	phocoena					1855			Hedmark
WO	NHMO-DMA-28825/1-P	2585	no	Phocoenidae	Phocoena phocoena	Phocoena	phocoena					1855
WO	NHMO-DMA-28827/1-P	2586	no	Phocoenidae	Phocoena phocoena	Phocoena	phocoena					1855
WO	NHMO-DMA-31360/1-P	M 3050. From same individual as3053	no	Balaenopteridae	Balaenoptera musculus	Balaenoptera	musculus					1858		Tvedestrand	Aust-Agder	Norway	R.
WO	NHMO-DMA-32075/1-P	M 5069	no	Balaenopteridae	Balaenoptera musculus	Balaenoptera	musculus			25	5	1874		Vadsø	Finnmark	Norway
WO	NHMO-DMA-29966/1-P	5675	no	Balaenopteridae	Balaenoptera musculus	Balaenoptera	musculus					1878		Vadsø	Finnmark	Norway	Collett, Robert	scientist
WO	NHMO-DMA-30534/1-O = NHMO-DMA-29968/1-P	5678, 5679 (label on half skull; 56xx)	yes	Phocoenidae	Phocoena phocoena	Phocoena	phocoena				11	1878		Oslofjorden	Oslo	Norway
WO	NHMO-DMA-30019/1-P	5949	yes	Phocoenidae	Phocoena phocoena	Phocoena	phocoena			19	11	1880		Oslofjorden	Oslo	Norway
WO	NHMO-DMA-30034/1-P	6073	yes	Balaenopteridae	Balaenoptera musculus	Balaenoptera	musculus			19	7	1881		Vadsø	Finnmark	Norway
WO	NHMO-DMA-32286/1-P	M 6055	no	Balaenopteridae	Balaenoptera musculus	Balaenoptera	musculus		Foetus/ sjekk bilde - navlesnor? Xx	29	7	1881		Vadsø	Finnmark	Norway	Guldberg	scientist	fra conserv, Guldbergs reise 1881
WO	NHMO-DMA-32335/1-P	M 6193	no	Balaenopteridae	Balaenoptera borealis	Balaenoptera	borealis				8	1882		Nordkapp	Finnmark	Norway	Hansen - Tufjord hval.etabl.	Captain
WO	NHMO-DMA-31355/1-P	M 3036	yes	Balaenopteridae	Balaenoptera musculus	Balaenoptera	musculus			7	7	1882			Finnmark	Norway	Guldberg	scientist	fra conserv, Guldbergs reise 1882
WO	NHMO-DMA-31356/1-P	M 3038	no	Balaenopteridae	Balaenoptera musculus	Balaenoptera	musculus					1882			Finnmark	Norway	Guldberg	scientist	fra conserv, Guldbergs reise 1882
WO	NHMO-DMA-31370/1-P	M 3083	no	Balaenopteridae	Balaenoptera musculus	Balaenoptera	musculus					1882			Finnmark	Norway	Guldberg	scientist	fra conserv, Guldbergs reise 1882
WO	NHMO-DMA-31682/1-P	M 37	no	Balaenopteridae	Balaenoptera musculus	Balaenoptera	musculus					1882		Vardø	Finnmark	Norway
WO	NHMO-DMA-31354/1-P	M 3034	no	Balaenopteridae	Megaptera novaeangliae	Megaptera	novaeangliae					1882				Norway	Guldberg	scientist	Ex
WO	NHMO-DMA-31371/1-P	M 3085	no	Balaenopteridae	Megaptera novaeangliae	Megaptera	novaeangliae					1882		Vardø	Finnmark	Norway
WO	NHMO-DMA-30044/1-P	6159	yes	Balaenopteridae	Balaenoptera musculus	Balaenoptera	musculus		foetus			1883		Vardø	Finnmark	Norway	Guldberg	scientist
WO	NHMO-DMA-31402/1-P	M 3145	no	Balaenopteridae	Balaenoptera musculus	Balaenoptera	musculus					1883		Vardø	Finnmark	Norway	Guldberg	scientist	fra conserv, Guldbergs reise 1883
WO	NHMO-DMA-30053/1-P	6228	no	Balaenopteridae	Balaenoptera musculus	Balaenoptera	musculus					1885		Vardø	Finnmark	Norway
WO	NHMO-DMA-32234/1-P	M 58	no		? ?	?	?					1890
WO	NHMO-DMA-25155/2-P	specimen lacks museum number	no	Delphinidae	Delphinus delphis	Delphinus	delphis					1855?	Oslofjorden		Oslo	Norway			[Collector]: C's dagbok. [Collected date]: før 1875. [Preparation]: kan være=2538(hjerne) fra 1855(?). Anm.: C:1912: 676: mont. 1850-årene. Omtalt av Liljeborg 1861 i Ups.Univ.Årssla. 1861: 6.
WO	NHMO-DMA-29967/1-P	5677	no	Balaenopteridae	Balaenoptera acutorostrata	Balaenoptera	acutorostrata									Atlantic Ocean
WO	specimen added by LLD; no museum number	no museum number	yes		Physeter macrocephalus	Physeter	macrocephalus								Grytviken	South Georgia and the South Sandwich Islands	C. A. Larsen	captain, participant Nordenskiölds expedition to South Shetland & South Georgia, whaling company owner, the first in the south
WO	NHMO-DMA-30085/1-P	6533	yes	Monodontidae	Delphinapterus leucas	Delphinapterus	leucas
WO	specimen added by LLD; uncertain numbering	"nr 10"	yes		stomach content from Delphinapterus leucas	stomach content from Delphinapterus leucas

## Sheet: NHM Copenhagen specimens
Museum number	Other museum number	Latin Genus	Latin Species	Sex	Ontogeny	DD	MD	AAR	Locality	Municipality	County	CountryName	Collector	Occupation/ title of finder	Aquired how K= bought, G= gift, B = swap, Ex= from field exursion
CN 3 Balaenoptera musculus		Balaenoptera	musculus	F				1843	Godhavn			Greenland	HCP Møller
CN 3 Orcinus orca		Orcinus	orca	F				1844	Davisstredet		Davisstredet	Greenland	CP Holbøll (finder or something else?)
MCE 1606 Phocoena phocoena		Phocoena	phocoena	F	Ad			1853	Middelfart			Denmark			Eschricht collection of innominates
MCE 1607 Phocoena phocoena		Phocoena	phocoena	F	Ad			1853	Middelfart			Denmark			Eschricht collection of innominates
MCE 1608 Phocoena phocoena		Phocoena	phocoena	F	Ad			1853	Middelfart			Denmark			Eschricht collection of innominates
MCE 1609 Phocoena phocoena		Phocoena	phocoena	F	Ad			1853	Middelfart			Denmark			Eschricht collection of innominates
CN 2 Orcinus orca		Orcinus	orca	F	Juv		2	1855	Kattegat			Denmark
CN 2 Lagenorhynchus acutus		Lagenorhynchus	acutus	F		20	10	1859				Greenland	H. J. Rink	Det kgl. Naturhistoriske museum
CN6 Lagenorhynchus albirostris		Lagenorhynchus	albirostris	F		11	5	1866	Kalveboderne	K;benhavn		Denmark			Stranded
CN5 Monodon monoceros		Monodon	monoceros	F		14	1	1868				Greenland
CN 5 Monodon monoceros		Monodon	monoceros	F				1868				Greenland
CN 9 Orcinus orca		Orcinus	orca	F		27	9	1872	Limfjorden			Denmark
CN9 Orcinus orca		Orcinus	orca	F		27	9	1872	Limfjorden			Denmark
CN 5 Lagenorhynchus albirostris		Lagenorhynchus	albirostris	F		18	2	1882		Kattegat	Obeltoft	Denmark
CN 11 Monodon monoceros		Monodon	monoceros	F			5	1884	Tusak, Upernivik			Greenland	Hr. Ellberg
CN 4 Mesoplodon bidens		Mesoplodon	bidens	F		20	12	1899	Klintmøller	Jylland		Denmark
CN 16 Megaptera novaengliae		Megaptera	novaengliae	F	Juv	2	9	1905
CN 19 Balaenoptera musculus		Balaenoptera	musculus	F		11	12	1931	Årøsund			Denmark	locals, then bought by two buntmagere, deal with Zoological museum		stranded, then killed
Phocoena phocoena		Phocoena	phocoena	F	Ad	19	12	1942	Gamborg Fj.			Denmark
CN 27 Balaenoptera acutorostrata		Balaenoptera	acutorostrata	F		18	11	1944	Fredrikshavn			Denmark			stranded
CN 25 Hyperoodon ampullatus		Hyperoodon	ampullatus	F		3	10	1957	Bellevue ved København			Denmark	Svend Jørgensen	Fish exporter
CN 302 Balaenoptera acutorostrata		Balaenoptera	acutorostrata	F		2	10	1976	Kogebugt			Greenland	samlet av Fleming Roth
CN 257 Hyperoodon ampullatus		Hyperoodon	ampullatus	F		18	7	1978	Rømø			Denmark
CN 93 Lagenorhynchus albirostris		Lagenorhynchus	albirostris	F		3	12	1979			Fanø	Denmark
CN 90 Balaenoptera borealis		Balaenoptera	borealis	F		3	8	1980	Nordborg, Als.			Denmark			ilanddrevet
CN 744 Monodon monoceros		Monodon	monoceros	F	Ad			1980			NV Greenland	Greenland	Seddon	captain
CN 352 Monodon monoceros		Monodon	monoceros	F			8	1980			V Greenland	Greenland	Seddon	captain
CN 247 Balaenoptera acutorostrata		Balaenoptera	acutorostrata	F		11	8	1982	Skagen	Jylland		Denmark			"barder utlånt til Nordsjømuseet 1998"
CN 392 Lagenorhynchus albirostris		Lagenorhynchus	albirostris	F		19	6	1987			Esbjerg	Denmark
CN 604 Lagenorhynchus albirostris		Lagenorhynchus	albirostris	F		8	7	1989			Fredericcia	Denmark
CN 605 Lagenorhynchus albirostris		Lagenorhynchus	albirostris	F		11	7	1989		Nakkebøllefjord	Fåborg	Denmark
CN 683 Lagenorhynchus albirostris		Lagenorhynchus	albirostris	F		23	4	1990			Esbjerg	Denmark
CN 691 Lagenorhynchus albirostris	box + skull	Lagenorhynchus	albirostris	F		21	6	1990			Fanø	Denmark
M 1068 Orcinus orca		Orcinus	orca	F		14	1	1995	Mandø			Denmark
MCE 1275 Balaenoptera acutorostrata		Balaenoptera	acutorostrata	F		5	9	2001	Fjaltring			Denmark
MCE 1287 Lagenorhynchus albirostris	2 boxes	Lagenorhynchus	albirostris	F		28	10	2002			Nr. Hvorupen	Denmark
MCE 1395 Monodon monoceros		Monodon	monoceros	F				2004	Godhavn			Greenland
MCE 1397 Monodon monoceros		Monodon	monoceros	F				2004	Godhavn			Greenland
MCE 1401 Monodon monoceros		Monodon	monoceros	F				2004	Godhavn			Greenland
MCE 1402 Monodon monoceros		Monodon	monoceros	F				2004	Godhavn			Greenland
M 1639 Delphinus delphis		Delphinus	delphis	F		3	10	2010			Skagen	Denmark	R. Christensen
MCE 1605 Balaenoptera acutorostrata		Balaenoptera	acutorostrata	F		4	7	2011
M1680 Lagenorhynchus albirostris		Lagenorhynchus	albirostris	F		24	1	2017			Randersfjord	Denmark
Steno bredaensis		Steno	bredanensis	F					17'20 VL, 1'14S.Br			Atlantic Ocean	A. F. Andersen
CN 89 Orcinus orca		Orcinus	orca	F					Aalborg			Denmark
MCE 1248 Phocoena phocoena		Phocoena	phocoena	F					Bornholm			Denmark
MCE 1610 Phocoena phocoena		Phocoena	phocoena	F					Middelfart			Denmark			Eschricht collection of innominates
CN 2 Balaenoptera acutorostrata		Balaenoptera	acutorostrata	F					Sukkertoppen			Greenland
MCE 1357 Monodon monoceros		Monodon	monoceros	F					Umanaq/Uummannaq			Greenland
CN 542 Phocoena phocoena		Phocoena	phocoena	F								Greenland
CN 558 Phocoena phocoena		Phocoena	phocoena	F								Greenland
CN 1 Balaenoptera acutorostrata		Balaenoptera	acutorostrata	F						Bergen		Norway
CN 945 Lagenorhynchus albirostris		Lagenorhynchus	albirostris	F
CN 946 Lagenorhynchus albirostris	hvirvler in one box + one box	Lagenorhynchus	albirostris	F
CN 947 Lagenorhynchus albirostris	hvirvler in one box + one box	Lagenorhynchus	albirostris	F
CN 95 Lagenorhynchus albirostris		Lagenorhynchus	albirostris	F
MCE 1249 Lagenorhynchus albirostris	"267 cm"	Lagenorhynchus	albirostris	F
MCE 1643 Lagenorhynchus albirostris		Lagenorhynchus	albirostris	F
MCE 1628 Delphinus delphis		Delphinus	delphis	F	Ad										Eschricht collection of innominates
MCE 1396 Monodon monoceros		Monodon	monoceros	F
CN 307 Phocoena phocoena		Phocoena	phocoena	F	Ad
CN 312 Phocoena phocoena		Phocoena	phocoena	F	Ad
CN 316 Phocoena phocoena		Phocoena	phocoena	F	Ad
CN 490 Phocoena phocoena		Phocoena	phocoena	F	Foe
CN 310 Phocoena phocoena		Phocoena	phocoena	F	Juv
CN 101 Phocoena phocoena		Phocoena	phocoena	F
CN 102 Phocoena phocoena		Phocoena	phocoena	F
CN 106 Phocoena phocoena		Phocoena	phocoena	F
CN 109 Phocoena phocoena		Phocoena	phocoena	F
CN 111 Phocoena phocoena		Phocoena	phocoena	F
CN 114 Phocoena phocoena		Phocoena	phocoena	F
CN 119 Phocoena phocoena		Phocoena	phocoena	F
CN 120 Phocoena phocoena		Phocoena	phocoena	F
CN 121 Phocoena phocoena		Phocoena	phocoena	F
CN 122 Phocoena phocoena		Phocoena	phocoena	F
CN 126 Phocoena phocoena		Phocoena	phocoena	F
CN 128 Phocoena phocoena		Phocoena	phocoena	F
CN 130 Phocoena phocoena		Phocoena	phocoena	F
CN 131 Phocoena phocoena		Phocoena	phocoena	F
CN 132 Phocoena phocoena		Phocoena	phocoena	F
CN 133 Phocoena phocoena		Phocoena	phocoena	F
CN 136 Phocoena phocoena		Phocoena	phocoena	F
CN 138 Phocoena phocoena		Phocoena	phocoena	F
CN 143 Phocoena phocoena		Phocoena	phocoena	F
CN 143 Phocoena phocoena		Phocoena	phocoena	F
CN 146 Phocoena phocoena		Phocoena	phocoena	F
CN 151 Phocoena phocoena		Phocoena	phocoena	F
CN 152 Phocoena phocoena		Phocoena	phocoena	F
CN 157 Phocoena phocoena		Phocoena	phocoena	F
CN 159 Phocoena phocoena		Phocoena	phocoena	F
CN 160 Phocoena phocoena		Phocoena	phocoena	F
CN 161 Phocoena phocoena		Phocoena	phocoena	F
CN 162 Phocoena phocoena		Phocoena	phocoena	F
CN 166 Phocoena phocoena		Phocoena	phocoena	F
CN 167 Phocoena phocoena		Phocoena	phocoena	F
CN 169 Phocoena phocoena		Phocoena	phocoena	F
CN 171 Phocoena phocoena		Phocoena	phocoena	F
CN 172 Phocoena phocoena		Phocoena	phocoena	F
CN 173 Phocoena phocoena		Phocoena	phocoena	F
CN 174 Phocoena phocoena		Phocoena	phocoena	F
CN 176 Phocoena phocoena		Phocoena	phocoena	F
CN 177 Phocoena phocoena		Phocoena	phocoena	F
CN 178 Phocoena phocoena		Phocoena	phocoena	F
CN 179 Phocoena phocoena		Phocoena	phocoena	F
CN 180 Phocoena phocoena		Phocoena	phocoena	F
CN 185 Phocoena phocoena		Phocoena	phocoena	F
CN 190 Phocoena phocoena		Phocoena	phocoena	F
CN 191 Phocoena phocoena		Phocoena	phocoena	F
CN 193 Phocoena phocoena		Phocoena	phocoena	F
CN 202 Phocoena phocoena		Phocoena	phocoena	F
CN 209 Phocoena phocoena		Phocoena	phocoena	F
CN 212 Phocoena phocoena		Phocoena	phocoena	F
CN 213 Phocoena phocoena		Phocoena	phocoena	F
CN 215 Phocoena phocoena		Phocoena	phocoena	F
CN 217 Phocoena phocoena		Phocoena	phocoena	F
CN 218 Phocoena phocoena		Phocoena	phocoena	F
CN 219 Phocoena phocoena		Phocoena	phocoena	F
CN 222 Phocoena phocoena		Phocoena	phocoena	F
CN 223 Phocoena phocoena		Phocoena	phocoena	F
CN 229 Phocoena phocoena		Phocoena	phocoena	F
CN 232 Phocoena phocoena		Phocoena	phocoena	F
CN 233 Phocoena phocoena		Phocoena	phocoena	F
CN 234 Phocoena phocoena		Phocoena	phocoena	F
CN 261 Phocoena phocoena		Phocoena	phocoena	F
CN 262 Phocoena phocoena		Phocoena	phocoena	F
CN 308 Phocoena phocoena		Phocoena	phocoena	F
CN 314 Phocoena phocoena		Phocoena	phocoena	F
CN 319 Phocoena phocoena		Phocoena	phocoena	F
CN 320 Phocoena phocoena		Phocoena	phocoena	F
CN 321 Phocoena phocoena		Phocoena	phocoena	F
CN 334 Phocoena phocoena		Phocoena	phocoena	F
CN 338 Phocoena phocoena		Phocoena	phocoena	F
CN 343 Phocoena phocoena		Phocoena	phocoena	F
CN 353 Phocoena phocoena		Phocoena	phocoena	F
CN 354 Phocoena phocoena		Phocoena	phocoena	F
CN 357 Phocoena phocoena		Phocoena	phocoena	F
CN 366 Phocoena phocoena		Phocoena	phocoena	F
CN 369 Phocoena phocoena		Phocoena	phocoena	F
CN 372 Phocoena phocoena		Phocoena	phocoena	F
CN 374 Phocoena phocoena		Phocoena	phocoena	F
CN 375 Phocoena phocoena		Phocoena	phocoena	F
CN 377 Phocoena phocoena		Phocoena	phocoena	F
CN 378 Phocoena phocoena		Phocoena	phocoena	F
CN 380 Phocoena phocoena		Phocoena	phocoena	F
CN 388 Phocoena phocoena		Phocoena	phocoena	F
CN 390 Phocoena phocoena		Phocoena	phocoena	F
CN 395 Phocoena phocoena		Phocoena	phocoena	F
CN 399 Phocoena phocoena		Phocoena	phocoena	F
CN 403 Phocoena phocoena		Phocoena	phocoena	F
CN 408 Phocoena phocoena		Phocoena	phocoena	F
CN 410 Phocoena phocoena		Phocoena	phocoena	F
CN 412 Phocoena phocoena		Phocoena	phocoena	F
CN 413 Phocoena phocoena		Phocoena	phocoena	F
CN 424 Phocoena phocoena		Phocoena	phocoena	F
CN 428 Phocoena phocoena		Phocoena	phocoena	F
CN 432 Phocoena phocoena		Phocoena	phocoena	F
CN 436 Phocoena phocoena		Phocoena	phocoena	F
CN 441 Phocoena phocoena		Phocoena	phocoena	F
CN 452 Phocoena phocoena		Phocoena	phocoena	F
CN 454 Phocoena phocoena		Phocoena	phocoena	F
CN 455 Phocoena phocoena		Phocoena	phocoena	F
CN 457 Phocoena phocoena		Phocoena	phocoena	F
CN 458 Phocoena phocoena		Phocoena	phocoena	F
CN 487 Phocoena phocoena		Phocoena	phocoena	F
CN 489 Phocoena phocoena		Phocoena	phocoena	F
CN 582 Phocoena phocoena		Phocoena	phocoena	F
CN 96 Phocoena phocoena		Phocoena	phocoena	F
CN 98 Phocoena phocoena		Phocoena	phocoena	F
MCE 1472 Phocoena phocoena		Phocoena	phocoena	F
MCE 1477 Phocoena phocoena		Phocoena	phocoena	F
MCE 1481 Phocoena phocoena		Phocoena	phocoena	F
MCE 1483 Phocoena phocoena		Phocoena	phocoena	F
MCE 1487 Phocoena phocoena		Phocoena	phocoena	F
MCE 1491 Phocoena phocoena		Phocoena	phocoena	F
MCE 1493 Phocoena phocoena		Phocoena	phocoena	F
MCE 1494 Phocoena phocoena		Phocoena	phocoena	F
MCE 1497 Phocoena phocoena		Phocoena	phocoena	F
MCE 1498 Phocoena phocoena		Phocoena	phocoena	F
MCE 1501 Phocoena phocoena		Phocoena	phocoena	F
MCE 1503 Phocoena phocoena		Phocoena	phocoena	F
MCE 1504 Phocoena phocoena		Phocoena	phocoena	F
MCE 1505 Phocoena phocoena		Phocoena	phocoena	F
MCE 1507 Phocoena phocoena		Phocoena	phocoena	F
MCE 1509 Phocoena phocoena		Phocoena	phocoena	F
MCE 1511 Phocoena phocoena		Phocoena	phocoena	F
MCE 1514 Phocoena phocoena		Phocoena	phocoena	F
MCE 1515 Phocoena phocoena		Phocoena	phocoena	F
MCE 1516 Phocoena phocoena		Phocoena	phocoena	F
MCE 1517 Phocoena phocoena		Phocoena	phocoena	F
MCE 1518 Phocoena phocoena		Phocoena	phocoena	F
MCE 1520 Phocoena phocoena		Phocoena	phocoena	F
MCE 1521 Phocoena phocoena		Phocoena	phocoena	F
MCE 1522 Phocoena phocoena		Phocoena	phocoena	F
MCE 1524 Phocoena phocoena		Phocoena	phocoena	F
MCE 1529 Phocoena phocoena		Phocoena	phocoena	F
MCE 1530 Phocoena phocoena		Phocoena	phocoena	F
MCE 1531 Phocoena phocoena		Phocoena	phocoena	F
MCE 1537 Phocoena phocoena		Phocoena	phocoena	F
MCE 1538 Phocoena phocoena		Phocoena	phocoena	F
MCE 1539 Phocoena phocoena		Phocoena	phocoena	F
MCE 1540 Phocoena phocoena		Phocoena	phocoena	F
MCE 1542 Phocoena phocoena		Phocoena	phocoena	F
MCE 1545 Phocoena phocoena		Phocoena	phocoena	F
MCE 1548 Phocoena phocoena		Phocoena	phocoena	F
MCE 1550 Phocoena phocoena		Phocoena	phocoena	F
MCE 1552 Phocoena phocoena		Phocoena	phocoena	F
MCE 1555 Phocoena phocoena		Phocoena	phocoena	F
MCE 1557 Phocoena phocoena		Phocoena	phocoena	F
MCE 1558 Phocoena phocoena		Phocoena	phocoena	F
MCE 1562 Phocoena phocoena		Phocoena	phocoena	F
MCE 1563 Phocoena phocoena		Phocoena	phocoena	F
MCE 1564 Phocoena phocoena		Phocoena	phocoena	F
MCE 1565 Phocoena phocoena		Phocoena	phocoena	F
MCE 1566 Phocoena phocoena		Phocoena	phocoena	F
MCE 1567 Phocoena phocoena		Phocoena	phocoena	F
MCE 1568 Phocoena phocoena		Phocoena	phocoena	F
MCE 1569 Phocoena phocoena		Phocoena	phocoena	F
MCE 1570 Phocoena phocoena		Phocoena	phocoena	F
MCE 1571 Phocoena phocoena		Phocoena	phocoena	F
MCE 1572 Phocoena phocoena		Phocoena	phocoena	F
MCE 1573 Phocoena phocoena		Phocoena	phocoena	F
CN 13 Balaenoptera physalus		Balaenoptera	physalus	F	Juv
CN 1 Globicephala melas		Globicephala	melas	M		28	6	1844	Vaagø			Faroe Islands	Fredrik VII (but is this the finder??)
CN1 Globicephala melas		Globicephala	melas	M		28	6	1844	Vaagø			Faroe Islands	Fredrik VIII (finder??)
CN2 Globicephala melas		Globicephala	melas	M		28	6	1844	Vaagø			Faroe Islands
CN 2 Balaena mysticetus		Balaena	mysticetus	M	Juv			1857	Godhavn			Greenland
CN 1 Balaena mysticetus		Balaena	mysticetus	M				1860	Holsteinborg			Greenland
CN 2 Pseudorca crassidens		Pseudorca	crassidens	M				1862			Middelfart	Denmark
CN2 Pseudorca crassidens		Pseudorca	crassidens	M				1862	Middelfart			Denmark
CN 1 Balaenoptera physalus		Balaenoptera	physalus	M	says juv, but gigantic	5	9	1865				Greenland	C.P. Holbøll
CN 19 Lagenorhynchus albirostris		Lagenorhynchus	albirostris	M		9	6	1888			Fredrikshavn	Denmark	Simonsen	Fiskehandler
CN 4 Mesoplodon bidens		Mesoplodon	bidens	M		20	12	1899	Klintmøller, Jylland			Denmark
MCE 1307 Physeter macrocephalus		Physeter	macrocephalus	M				1941	Hirtshals	Vendsyssel		Denmark
CN 317 Lagenorhynchus albirostris		Lagenorhynchus	albirostris	M		30	7	1986			Hvidesande	Denmark
CN 367 Delphinapterus leucas		Delphinapterus	leucas	M		9	4	1987			Hornsved	Denmark	Alholm u.f.
CN 509 Lagenorhynchus albirostris		Lagenorhynchus	albirostris	M		19	8	1988			Klitmøller	Denmark
CN 425 Globicephala melas		Globicephala	melas	M		7	1	1988	Nyosl.	Møn		Denmark
CN 851 Physeter macrocephalus		Physeter	macrocephalus	M		2	12	1991
MCE 1231 Balaenoptera acutorostrata		Balaenoptera	acutorostrata	M		14	3	2000	Skråstrup	Bogense	Fyn	Denmark
MCE 1274 Balaenoptera acutorostrata		Balaenoptera	acutorostrata	M		8	8	2001	Kandestederne			Denmark
MCE 1260 Lagenorhynchus albirostris	2 boxes	Lagenorhynchus	albirostris	M		7	6	2001			Holmsland Klint	Denmark
MCE 1271 Lagenorhynchus albirostris	2 boxes	Lagenorhynchus	albirostris	M		30	1	2002			Febbersted	Denmark
MCE 1273 Lagenorhynchus albirostris	2 boxes	Lagenorhynchus	albirostris	M		30	1	2002			Vigsø	Denmark
MCE 1391 Monodon monoceros		Monodon	monoceros	M				2004	Godhavn			Greenland
MCE 1392 Monodon monoceros		Monodon	monoceros	M				2004	Godhavn			Greenland
MCE 1393 Monodon monoceros		Monodon	monoceros	M				2004	Godhavn			Greenland
MCE 1400 Monodon monoceros		Monodon	monoceros	M				2004	Godhavn			Greenland
MCE 1403 Monodon monoceros		Monodon	monoceros	M				2004	Godhavn			Greenland
MCE 1642 Physeter macrocephalus		Physeter	macrocephalus	M		13	3	2012	Lyngøy	Nord-Jylland		Denmark	LF Jensen
MCE 1644 Physeter macrpcephalus		Physeter	macrocephalus	M		17	2	2014		Henne strand		Denmark	legit Rasmus S Larsen		stranded - two specimens had same story (don’t know museum number) (ref Det dyrebare utstillingskatalog)
M1102 Hyperoodon ampullatus		Hyperoodon	ampullatus	M					Tåsinge			Denmark
CN 719 Physeter macrocephalus		Physeter	macrocephalus	M					Nymindegab			Denmark
MCE 1611 Phocoena phocoena		Phocoena	phocoena	M					Middelfart			Denmark			Eschricht collection of innominates
MCE 1612 Phocoena phocoena		Phocoena	phocoena	M					Middelfart			Denmark			Eschricht collection of innominates
CN 1 Hyperoodon ampullatus		Hyperoodon	ampullatus	M								Faroe Islands
MCE 1484 Phocoena phocoena		Phocoena	phocoena	M								Greenland
CN 85 Monodon monoceros		Monodon	monoceros	M	Juv								"modtaget fra Landbrukshøjskolen 1972. 1919 Købt av kontorchef Bangert 20.8.1974
MCE 1633 Orcinus orca	disse fire skal matches til kranier CN 12, 13, 14 eller 15	Orcinus	orca	M									Steenstrup		Eschricht collection of innominates
unnumbered Cetacea		?	?	M
M 1640 Lagenorhynchus acutus		Lagenorhynchus	acutus	M
CN 22 Lagenorhynchus albirostris		Lagenorhynchus	albirostris	M
CN 394 Lagenorhynchus albirostris		Lagenorhynchus	albirostris	M
CN 944 Lagenorhynchus albirostris		Lagenorhynchus	albirostris	M
M 1672 Delphinus delphis		Delphinus	delphis	M
MCE 1627 Delphinus delphis		Delphinus	delphis	M											Eschricht collection of innominates
MCE 1615 Delphinapterus leucas		Delphinapterus	leucas	M											Eschricht collection of innominates
CN 850 Physeter macrocephalus		Physeter	macrocephalus	M
CN 65 Monodon monoceros		Monodon	monoceros	M	Ad
CN 16 Monodon monoceros		Monodon	monoceros	M
CN 17 Monodon monoceros		Monodon	monoceros	M
CN 18 Monodon monoceros		Monodon	monoceros	M
CN 83 Monodon monoceros		Monodon	monoceros	M
CN 84 Monodon monoceros		Monodon	monoceros	M
CN 1 Orcinus orca		Orcinus	orca	M
CN 311 Phocoena phocoena		Phocoena	phocoena	M	Ad
CN 459 Phocoena phocoena		Phocoena	phocoena	M	Foe
CN 313 Phocoena phocoena		Phocoena	phocoena	M	Juv
CN 100 Phocoena phocoena		Phocoena	phocoena	M
CN 103 Phocoena phocoena		Phocoena	phocoena	M
CN 104 Phocoena phocoena		Phocoena	phocoena	M
CN 105 Phocoena phocoena		Phocoena	phocoena	M
CN 107 Phocoena phocoena		Phocoena	phocoena	M
CN 108 Phocoena phocoena		Phocoena	phocoena	M
CN 110 Phocoena phocoena		Phocoena	phocoena	M
CN 112 Phocoena phocoena		Phocoena	phocoena	M
CN 115 Phocoena phocoena		Phocoena	phocoena	M
CN 116 Phocoena phocoena		Phocoena	phocoena	M
CN 118 Phocoena phocoena		Phocoena	phocoena	M
CN 123 Phocoena phocoena		Phocoena	phocoena	M
CN 124 Phocoena phocoena		Phocoena	phocoena	M
CN 125 Phocoena phocoena		Phocoena	phocoena	M
CN 129 Phocoena phocoena		Phocoena	phocoena	M
CN 134 Phocoena phocoena		Phocoena	phocoena	M
CN 135 Phocoena phocoena		Phocoena	phocoena	M
CN 137 Phocoena phocoena		Phocoena	phocoena	M
CN 139 Phocoena phocoena		Phocoena	phocoena	M
CN 140 Phocoena phocoena		Phocoena	phocoena	M
CN 141 Phocoena phocoena		Phocoena	phocoena	M
CN 142 Phocoena phocoena		Phocoena	phocoena	M
CN 142 Phocoena phocoena		Phocoena	phocoena	M
CN 145 Phocoena phocoena		Phocoena	phocoena	M
CN 147Phocoena phocoena		Phocoena	phocoena	M
CN 148 Phocoena phocoena		Phocoena	phocoena	M
CN 149 Phocoena phocoena		Phocoena	phocoena	M
CN 150 Phocoena phocoena		Phocoena	phocoena	M
CN 153 Phocoena phocoena		Phocoena	phocoena	M
CN 154 Phocoena phocoena		Phocoena	phocoena	M
CN 155 Phocoena phocoena		Phocoena	phocoena	M
CN 156 Phocoena phocoena		Phocoena	phocoena	M
CN 158 Phocoena phocoena		Phocoena	phocoena	M
CN 163 Phocoena phocoena		Phocoena	phocoena	M
CN 164 Phocoena phocoena		Phocoena	phocoena	M
CN 165 Phocoena phocoena		Phocoena	phocoena	M
CN 168 Phocoena phocoena		Phocoena	phocoena	M
CN 170 Phocoena phocoena		Phocoena	phocoena	M
CN 175 Phocoena phocoena		Phocoena	phocoena	M
CN 181 Phocoena phocoena		Phocoena	phocoena	M
CN 182 Phocoena phocoena		Phocoena	phocoena	M
CN 186 Phocoena phocoena		Phocoena	phocoena	M
CN 187 Phocoena phocoena		Phocoena	phocoena	M
CN 188 Phocoena phocoena		Phocoena	phocoena	M
CN 189 Phocoena phocoena		Phocoena	phocoena	M
CN 192 Phocoena phocoena		Phocoena	phocoena	M
CN 194 Phocoena phocoena		Phocoena	phocoena	M
CN 195 Phocoena phocoena		Phocoena	phocoena	M
CN 196 Phocoena phocoena		Phocoena	phocoena	M
CN 197 Phocoena phocoena		Phocoena	phocoena	M
CN 198 Phocoena phocoena		Phocoena	phocoena	M
CN 199 Phocoena phocoena		Phocoena	phocoena	M
CN 200 Phocoena phocoena		Phocoena	phocoena	M
CN 201 Phocoena phocoena		Phocoena	phocoena	M
CN 203 Phocoena phocoena		Phocoena	phocoena	M
CN 204 Phocoena phocoena		Phocoena	phocoena	M
CN 205 Phocoena phocoena		Phocoena	phocoena	M
CN 205 Phocoena phocoena		Phocoena	phocoena	M
CN 206 Phocoena phocoena		Phocoena	phocoena	M
CN 207 Phocoena phocoena		Phocoena	phocoena	M
CN 208 Phocoena phocoena		Phocoena	phocoena	M
CN 210 Phocoena phocoena		Phocoena	phocoena	M
CN 211 Phocoena phocoena		Phocoena	phocoena	M
CN 214 Phocoena phocoena		Phocoena	phocoena	M
CN 216 Phocoena phocoena		Phocoena	phocoena	M
CN 221 Phocoena phocoena		Phocoena	phocoena	M
CN 224 Phocoena phocoena		Phocoena	phocoena	M
CN 225 Phocoena phocoena		Phocoena	phocoena	M
CN 226 Phocoena phocoena		Phocoena	phocoena	M
CN 227 Phocoena phocoena		Phocoena	phocoena	M
CN 228 Phocoena phocoena		Phocoena	phocoena	M
CN 230 Phocoena phocoena		Phocoena	phocoena	M
CN 231 Phocoena phocoena		Phocoena	phocoena	M
CN 263 Phocoena phocoena		Phocoena	phocoena	M
CN 315 Phocoena phocoena		Phocoena	phocoena	M
CN 322 Phocoena phocoena		Phocoena	phocoena	M
CN 323 Phocoena phocoena		Phocoena	phocoena	M
CN 324 Phocoena phocoena		Phocoena	phocoena	M
CN 329 Phocoena phocoena		Phocoena	phocoena	M
CN 332 Phocoena phocoena		Phocoena	phocoena	M
CN 336 Phocoena phocoena		Phocoena	phocoena	M
CN 341 Phocoena phocoena		Phocoena	phocoena	M
CN 344 Phocoena phocoena		Phocoena	phocoena	M
CN 345Phocoena phocoena		Phocoena	phocoena	M
CN 365 Phocoena phocoena		Phocoena	phocoena	M
CN 367 Phocoena phocoena		Phocoena	phocoena	M
CN 368 Phocoena phocoena		Phocoena	phocoena	M
CN 371 Phocoena phocoena		Phocoena	phocoena	M
CN 373 Phocoena phocoena		Phocoena	phocoena	M
CN 379 Phocoena phocoena		Phocoena	phocoena	M
CN 382 Phocoena phocoena		Phocoena	phocoena	M
CN 385 Phocoena phocoena		Phocoena	phocoena	M
CN 398 Phocoena phocoena		Phocoena	phocoena	M
CN 400 Phocoena phocoena		Phocoena	phocoena	M
CN 404 Phocoena phocoena		Phocoena	phocoena	M
CN 405 Phocoena phocoena		Phocoena	phocoena	M
CN 407 Phocoena phocoena		Phocoena	phocoena	M
CN 409 Phocoena phocoena		Phocoena	phocoena	M
CN 411 Phocoena phocoena		Phocoena	phocoena	M
CN 414 Phocoena phocoena		Phocoena	phocoena	M
CN 415 Phocoena phocoena		Phocoena	phocoena	M
CN 417 Phocoena phocoena		Phocoena	phocoena	M
CN 423 Phocoena phocoena		Phocoena	phocoena	M
CN 426 Phocoena phocoena		Phocoena	phocoena	M
CN 438 Phocoena phocoena		Phocoena	phocoena	M
CN 439 Phocoena phocoena		Phocoena	phocoena	M
CN 440 Phocoena phocoena		Phocoena	phocoena	M
CN 442 Phocoena phocoena		Phocoena	phocoena	M
CN 443 Phocoena phocoena		Phocoena	phocoena	M
CN 444 Phocoena phocoena		Phocoena	phocoena	M
CN 445 Phocoena phocoena		Phocoena	phocoena	M
CN 446 Phocoena phocoena		Phocoena	phocoena	M
CN 448 Phocoena phocoena		Phocoena	phocoena	M
CN 449 Phocoena phocoena		Phocoena	phocoena	M
CN 450 Phocoena phocoena		Phocoena	phocoena	M
CN 451 Phocoena phocoena		Phocoena	phocoena	M
CN 453 Phocoena phocoena		Phocoena	phocoena	M
CN 460 Phocoena phocoena		Phocoena	phocoena	M
CN 462 Phocoena phocoena		Phocoena	phocoena	M
CN 463 Phocoena phocoena		Phocoena	phocoena	M
CN 478 Phocoena phocoena		Phocoena	phocoena	M
CN 479 Phocoena phocoena		Phocoena	phocoena	M
CN 484 Phocoena phocoena		Phocoena	phocoena	M
CN 485 Phocoena phocoena		Phocoena	phocoena	M
CN 486 Phocoena phocoena		Phocoena	phocoena	M
CN 488 Phocoena phocoena		Phocoena	phocoena	M
CN 505 Phocoena phocoena		Phocoena	phocoena	M
CN 507 Phocoena phocoena		Phocoena	phocoena	M
CN 677 Phocoena phocoena		Phocoena	phocoena	M
CN 714 Phocoena phocoena		Phocoena	phocoena	M
CN 742 Phocoena phocoena		Phocoena	phocoena	M
CN 97 Phocoena phocoena		Phocoena	phocoena	M
CN 99 Phocoena phocoena		Phocoena	phocoena	M
MCE 1471 Phocoena phocoena		Phocoena	phocoena	M
MCE 1473 Phocoena phocoena		Phocoena	phocoena	M
MCE 1474 Phocoena phocoena		Phocoena	phocoena	M
MCE 1476 Phocoena phocoena		Phocoena	phocoena	M
MCE 1479 Phocoena phocoena		Phocoena	phocoena	M
MCE 1480 Phocoena phocoena		Phocoena	phocoena	M
MCE 1485 Phocoena phocoena		Phocoena	phocoena	M
MCE 1486 Phocoena phocoena		Phocoena	phocoena	M
MCE 1488 Phocoena phocoena		Phocoena	phocoena	M
MCE 1489 Phocoena phocoena		Phocoena	phocoena	M
MCE 1490 Phocoena phocoena		Phocoena	phocoena	M
MCE 1492 Phocoena phocoena		Phocoena	phocoena	M
MCE 1495 Phocoena phocoena		Phocoena	phocoena	M
MCE 1496 Phocoena phocoena		Phocoena	phocoena	M
MCE 1499 Phocoena phocoena		Phocoena	phocoena	M
MCE 1500 Phocoena phocoena		Phocoena	phocoena	M
MCE 1502 Phocoena phocoena		Phocoena	phocoena	M
MCE 1506 Phocoena phocoena		Phocoena	phocoena	M
MCE 1508 Phocoena phocoena		Phocoena	phocoena	M
MCE 1510 Phocoena phocoena		Phocoena	phocoena	M
MCE 1512 Phocoena phocoena		Phocoena	phocoena	M
MCE 1513 Phocoena phocoena		Phocoena	phocoena	M
MCE 1519 Phocoena phocoena		Phocoena	phocoena	M
MCE 1523 Phocoena phocoena		Phocoena	phocoena	M
MCE 1525 Phocoena phocoena		Phocoena	phocoena	M
MCE 1526 Phocoena phocoena		Phocoena	phocoena	M
MCE 1527 Phocoena phocoena		Phocoena	phocoena	M
MCE 1528 Phocoena phocoena		Phocoena	phocoena	M
MCE 1532 Phocoena phocoena		Phocoena	phocoena	M
MCE 1533 Phocoena phocoena		Phocoena	phocoena	M
MCE 1534 Phocoena phocoena		Phocoena	phocoena	M
MCE 1535 Phocoena phocoena		Phocoena	phocoena	M
MCE 1536 Phocoena phocoena		Phocoena	phocoena	M
MCE 1541 Phocoena phocoena		Phocoena	phocoena	M
MCE 1543 Phocoena phocoena		Phocoena	phocoena	M
MCE 1544 Phocoena phocoena		Phocoena	phocoena	M
MCE 1546 Phocoena phocoena		Phocoena	phocoena	M
MCE 1547 Phocoena phocoena		Phocoena	phocoena	M
MCE 1549 Phocoena phocoena		Phocoena	phocoena	M
MCE 1551 Phocoena phocoena		Phocoena	phocoena	M
MCE 1553 Phocoena phocoena		Phocoena	phocoena	M
MCE 1554 Phocoena phocoena		Phocoena	phocoena	M
MCE 1556 Phocoena phocoena		Phocoena	phocoena	M
MCE 1560 Phocoena phocoena		Phocoena	phocoena	M
MCE 1561 Phocoena phocoena		Phocoena	phocoena	M
unnumbered Physeter macrpcephalus		Physeter	macrocephalus	Male		17	2	2014		Henne strand		Denmark			stranded - two specimens had same story (don’t know museum number) (ref Det dyrebare utstillingskatalog)
CN 2 Monodon monoceros		Monodon	monoceros	Male							Uummannaq Fjord	Greenland
CN 7 Phocoena phocoena		Phocoena	phocoena		Foe	7	6	1838			Kalveborderne	Denmark
CN2 Platanista gangetica		Platanista	gangetica					1840	Serampore			India	Dr. Mundt
CN 3 Balaenoptera physalus		Balaenoptera	physalus					1841	Sjællands odde			Denmark
CN 3 Balaena mysticetus		Balaena	mysticetus		newborn	6	5	1843	Diskobugten			Greenland	L. Fasting
CN 14 Delphinapterus leucas		Delphinapterus	leucas					1843
CN 2 Globicephala melas		Globicephala	melas			28	6	1844	Vaagø			Faroe Islands
CN 5 Hyperoodon ampullatus		Hyperoodon	ampullatus					1844				Greenland	Holbøl	Captain
unnumbered Balaenoptera acutorostrata		Balaenoptera	acutorostrata					1844
CN 1 Platanista gangetica		Platanista	gangetica			3	12	1845			Calcutta	India	Galathea-ekspedisjonen. Reinhardt
MCE 1626 Globicephala melas		Globicephala	melas					1853							Eschricht collection of innominates
CN 38 Delphinapterus leucas		Delphinapterus	leucas					1854				Greenland
CN 49 Delphinapterus leucas		Delphinapterus	leucas					1854				Greenland
CN 1 Eubalaena glacialis		Eubalaena	glacialis		Juv	17	1	1854	San Sebastian			Spain
CN 36 Delphinapterus leucas		Delphinapterus	leucas					1854
CN 11 Orcinus orca		Orcinus	orca				1	1858	Strømø,			Faroe Islands	HC Müller (finder or something else?)
MCE 1630 Orcinus orca		Orcinus	orca					1858	Kollefjord			Faroe Islands	Steenstrup		Eschricht collection of innominates
MCE 1631 Orcinus orca		Orcinus	orca					1858	Kollefjord			Faroe Islands	Steenstrup		Eschricht collection of innominates
MCE 1632 Orcinus orca		Orcinus	orca					1858	Kollefjord			Faroe Islands	Steenstrup		Eschricht collection of innominates
CN 3 Lagenorhynchus acutus		Lagenorhynchus	acutus			20	10	1859				Greenland	Dr. Rink
CN 80 Phocoena phocoena		Phocoena	phocoena					1860					Modtaget fra Landbrukshøyskolen 1972	Bendz?
CN 4 Hyperoodon ampullatus		Hyperoodon	ampullatus					1861				Faroe Islands
CN 24 Stenella sp.		Stenella	?			13	12	1862				Atlantic Ocean
CN 1 Pseudorca crassidens		Pseudorca	crassidens					1862	Refsnæs		Samsø-beltet	Denmark	Hr Barner		GIFT
CN 16 Balaenoptera acutorostrata		Balaenoptera	acutorostrata			25	11	1864	Godhavn			Greenland
CN? Prodelphinus attenuatus		Stenella	attenuata					1865				Atlantic Ocean	Kapt. Kygom?
CN 51 Delphinapterus leucas		Delphinapterus	leucas			5	9	1865
CN 4 Balaenoptera musculus		Balaenoptera	musculus			5	9	1865
CN 51 Monodon monoceros		Monodon	monoceros			15	11	1866			Umanak	Greenland	Fleischer
CN 14 Prodelphinus fraenatus		Stenella	frontalis				9	1867				Atlantic Ocean
(CN 1) CN 2 Balaenoptera musculus		Balaenoptera	musculus			29	12	1867				Iceland
CN3 Delphinus delphis		Delphinus	delphis			27	5	1869				Atlantic Ocean	A. F. Andersen
CN 13 Stenella coeruleoalba		Stenella	coeruleoalba			27	2	1869				Atlantic Ocean	W. F. Perrin
CN 13 Prodelphinus euphrysyne		Stenella	coerualba			27	2	1869				Atlantic Ocean
CN 10 Prodelphinus fraenatus		Stenella	frontalis			27	5	1869				Puerto Rico?
CN 4 Delphinapterus leucas		Delphinapterus	leucas			4	3	1870	Klaushavn			Greenland
CN 2 Tursiops truncatus		Tursiops	truncatus			15	2	1872				Faroe Islands
CN 30 Delphinus euphrosyne		Stenella	coerualba					1872				Mediterranean Ocean
CN 4 Delphinus delphis		Delphinus	delphis			27	8	1878			Amsterdamøen	Indian Ocean
CN 21 Delphinus alope		Stenella	longirostris			28	12	1878
CN 15 Prodelphinus longirostris		Stenella	longirostris			15	7	1882					W. F: Perrin
CN 6 Prodelphinus longirostris		Stenella	longirostris			15	7	1882					W. F: Perrin
CN 5 Delphinapterus leucas		Delphinapterus	leucas		Foe	1	7	1883				Greenland	Lieut. Ryder
CN 12 Monodon monoceros		Monodon	monoceros				6	1884	North Greenland			Greenland	Ellberg (person or place?)
CN 4 Balaenoptera musculus		Balaenoptera	musculus		Foe	29	9	1885				Iceland	Mons Larsen og co
CN 18 Lagenorhynchus albirostris		Lagenorhynchus	albirostris			1	10	1888			Godthaab	Greenland	Inspektør Ryberg og kolonibestyrer Bistrup		GIFT.
CN 17 Lagenorhynchus albirostris		Lagenorhynchus	albirostris			7	9	1889			Godthåb	Greenland
CN 938 Megaptera novaengliae		Megaptera	novaengliae			2	7	1891	Føns vig			Denmark
CN 2 Eubalaena glacialis		Eubalaena	glacialis			13	9	1891	L. Bay			Iceland
CN 5 Balaenoptera musculus		Balaenoptera	musculus			12	9	1891					Kapt. Wandel	Captain
CN 1 Stenodelphis blainvillei		Pontoporia	blainvillei			13	4	1892			La Plata-deltaet	Argentina	Museo la plata
CN1 Pontoporia blainvillei		Pontoporia	blainvillei			13	4	1892	La-Plata deltaet, Museu la Plata, Buenos Aires			Argentina
CN 17 Inia geoffrensis		Inia	geoffrensis			20	9	1892	Rio Apure			Venezuela	van Dockum
CN 18 Inia geoffrensis		Inia	geoffrensis			20	9	1892	Rio Apure			Venezuela	van Dockum
CN 931		?	?			15	12	1893				Africa (continent)
CN 14 Balaenoptera acutorostrata		Balaenoptera	acutorostrata			30	11	1893	Hvidbjerg			Denmark
CN 17 Hyperoodon ampullatus		Hyperoodon	ampullatus		Juv			1893				Faroe Islands	H. C. Müller
CN 43 Delphinapterus leucas		Delphinapterus	leucas			14	12	1893				Greenland
CN 1 Ziphius cavirostris		Ziphius	cavirostris			15	7	1893	Canterbury			New Zealand	Canterbury-museet
CN 61 Delphinapterus leucas		Delphinapterus	leucas			14	12	1893
CN 9 Balaenoptera musculus		Balaenoptera	borealis					1895					Ingolf Reijsen
CN 7 Physeter macrocephalus		Physeter	macrocephalus			20	4	1896				Azores	Chaves
CN 15 Tursiops truncatus (=tursio)		Tursiops	truncatus					1896				Azores	F. Chaves
CN 35 Monodon monoceros		Monodon	monoceros					1897				Greenland	Kolonibestyrer Olsen	Kolonibestyrer
CN 4 Eubalaena glacialis		Eubalaena	glacialis					1904				Iceland
CN 66 Phocoena communis		Phocoena	phocoena		Juv	1	9	1907				Denmark	Koserv. Hamburger Mare
CN 2 Balaenoptera borealis		Balaenoptera	borealis			4	9	1907				Faroe Islands	O. Finsen	apoteker
CN 4 Balaenoptera borealis		Balaenoptera	?borealis			8	6	1910	Kollefjord			Faroe Islands
CN 5 Balaenoptera borealis		Balaenoptera	?borealis			8	6	1910	Kollefjord			Faroe Islands
CN 28 Balaenoptera musculus		Balaenoptera	musculus			14	11	1911				Faroe Islands
CN 36 Monodon monoceros		Monodon	monoceros			28	9	1912			Umanak	Greenland	Bangert	kontorchef
unnumbered Balaenoptera sp.		Balaenoptera	?					1914	Tikaquqdliussaq	Godhavn		Denmark	M. P. Porsild
unnumbered Balaenoptera borealis		Balaenoptera	borealis				3	1914				South Georgia	Henning Jørgensen
CN 33 Prodelphinus doris		Stenella	frontalis					1915					?Møllers samling, Kolding. Hr. I O Brandtorff
CN 38 Monodon monoceros		Monodon	monoceros			26	11	1917
CN 23 Balaenoptera acutorostrata		Balaenoptera	acutorostrata			17	9	1918	?Nakkebølle			Denmark	HC Amtersen, Randers	Veterinary
CN 43 Monodon monoceros		Monodon	monoceros			20	12	1918			Thule	Greenland	P. Freuchen
unnumbered Monodon monoceros		Monodon	monoceros			25	4	1918
CN 939 Balaenoptera physalus		Balaenoptera	physalus					1923	Vejle Fjord			Denmark
CN 62 Delphinapterus leucas		Delphinapterus	leucas			26	6	1923					N. C. Nielsen
CN 24 Balaenoptera acutorostrata		Balaenoptera	acutorostrata			12	10	1923	Varde
CN 65 Delphinapterus leucas		Delphinapterus	leucas				8	1927					F. Johansen
CN 32 Lagenorhynchus albirostris		Lagenorhynchus	albirostris			17	3	1931			Lolland	Denmark
CN 36 Balaena mysticetus		Balaena	mysticetus					1935	Putdlat v. Egedesminde			Greenland
CN3 Grampus griseus		Grampus	griseus			15	11	1938	Nibe			Denmark	H. Hansen	Fiskeeksportør
CN 25 Monodon monoceros		Monodon	monoceros					1940			Inglefjeld fjord	Greenland	Chr. Vibe
MCE 1244 Lagenorhynchus acutus		Lagenorhynchus	acutus			27	10	1942		Fredrikssund		Denmark			GIFT from Korsagerskolen, Kbh
Phocoena phocoena		Phocoena	phocoena					1942	Gamborg Fj.			Denmark
CN 940 Balaenoptera physalus		Balaenoptera	physalus			13	10	1943	Korsør			Denmark			"Fiskernes ardeblag - sendt Zool mus"
MCE 1105 Balaenoptera musculus		Balaenoptera	musculus					1945				Antarctic Ocean	Leg. Skibslæge Hother Lund Knudsen, på et 8 måneders tokt 1945-46. Hvalfangerskipet MS Suderøy med havn I George bay, Sydgeorgien	Physician	Gave til ZM fra arvingene
CN 2 Globicephala macrohynchus		Globicephala	macrohynchus			7	11	1950	Yoff, N of Døhar, W-Africa			Senegal
CN 3 Tursiops tursio		Tursiops	truncatus			20	9	1951				Faroe Islands	Steenstrup
CN 8 Delphinus sp.		Delphinus	?			9	10	1951				Solomon Island	Galathea II
CN 38 Balaena mysticetus		Balaena	mysticetus					1952				Greenland	Chr. Vibe		found during digging at Thule airport, Greenland
CN 1 Globicephala macrohynchus		Globicephala	macrohynchus			15	2	1952					Galathea-ekspedisjonen 1950-52
CN 1 Stenella sp.		Stenella	?					1952							Galathea
CN 45 Delphinus delphis		Delphinus	delphis					1952							Galathea
CN 919 Balaenoptera acutorostrata		Balaenoptera	acutorostrata			1	7	1957	Hirtshals			Denmark			oppfisket
CN 20 Physeter macrocephalus		Physeter	macrocephalus			1	2	1960
MCE 1682 Phocoena phocoena		Phocoena	phocoena				4	1972	Svarta Hallar			Sweden
CN 91 Physeter macrocephalus		Physeter	macrocephalus				2	1979	Tværsted			Denmark
? Lagenorhynchus albirostris	2 boxes: ribbein + skulderblade + hvirvler'	Lagenorhynchus	albirostris				11	1981			Midtsønderjylland	Denmark
CN 14 Orcinus orca		Orcinus	orca					1981
CN 926 Balaenoptera acutorostrata		Balaenoptera	acutorostrata			30	10	1985				Denmark	Svend Åge Pedersen	Fisherman	"Fisket op I bundgarn ved Middelgeins Fortet d 30-10-1985. Fisker Svend Åge Pedersen
CN 259 Lagenorhynchus albirostris		Lagenorhynchus	albirostris			8	9	1985			Blokhus	Denmark
CN 480 Phocoena phocoena		Phocoena	phocoena			17	5	1988	Urne havn			Denmark
CN 559 Phocoena phocoena		Phocoena	phocoena					1988				Greenland
MCE 1362 Monodon monoceros		Monodon	monoceros					1993	Umanaq/Uummannaq			Greenland
1134 Phocoena phocoena		Phocoena	phocoena					1995	Esbjerg	Esbjerg		Denmark
CN 1135 Phocoena phocoena		Phocoena	phocoena					1995	Esbjerg	Esbjerg		Denmark
MCE 1096 Balaenoptera acutorostrata		Balaenoptera	acutorostrata			7	8	1996	Klitmøller			Denmark
MCE 1137 Balaenoptera acutorostrata		Balaenoptera	acutorostrata			25	8	1998	Vesterstad	Fanø		Denmark
053 Phocoena phocoena		Phocoena	phocoena					1998
054 Phocoena phocoena		Phocoena	phocoena					1998
056 Phocoena phocoena		Phocoena	phocoena					1998
057 Phocoena phocoena		Phocoena	phocoena					1998
058 Phocoena phocoena		Phocoena	phocoena					1998
059 Phocoena phocoena		Phocoena	phocoena					1998
060 Phocoena phocoena		Phocoena	phocoena					1998
061 Phocoena phocoena		Phocoena	phocoena					1998
062 Phocoena phocoena		Phocoena	phocoena					1998
063 Phocoena phocoena		Phocoena	phocoena					1998
064 Phocoena phocoena		Phocoena	phocoena					1998
MCE 1229 Phocoena phocoena		Phocoena	phocoena			13	3	1999	Bornholm			Denmark
unnumbered Balaenoptera acutorostrata		Balaenoptera	acutorostrata			9	3	2000	Kesteminde			Denmark
MCE 1272 Lagenorhynchus albirostris		Lagenorhynchus	albirostris			30	1	2002			Febbersted	Denmark
MCE 1278 Lagenorhynchus albirostris		Lagenorhynchus	albirostris			22	6	2002		Saltun	Hanherred	Denmark
M 1375 Monodon monoceros		Monodon	monoceros				sommer	2003	Thule			Denmark
MCE 1376 Monodon monoceros		Monodon	monoceros				sommer	2003	Thule			Greenland
MCE 1380 Monodon monoceros		Monodon	monoceros					2003	Thule			Greenland
MCE 1381 Monodon monoceros		Monodon	monoceros				sommer	2003	Thule			Greenland
MCE 1383 Monodon monoceros		Monodon	monoceros				sommer	2003	Thule			Greenland
MCE 1390 Monodon monoceros		Monodon	monoceros				sommer	2003	Thuleområdet			Greenland
MCE 1597 Balaenoptera physalus		Balaenoptera	physalus					2010	Vejle Fjord			Denmark
MCE 1666 Megaptera novaengliae		Megaptera	novaengliae					2015	Thy			Denmark
CN 17 Prodelphis longirostris		Stenella	longirostris									Australia
CN 2 Lagenorhynchus albirostris		Lagenorhynchus	albirostris						Jyllands vestkyst			Denmark
CN 1 Physeter macrocephalus		Physeter	macrocephalus						Sæby			Denmark
CN 10 Physeter macrocephalus		Physeter	macrocephalus						Sæby			Denmark
CN 540 Physeter macrocephalus		Physeter	macrocephalus						Sæby	Vendsyssel		Denmark
M 1382 Monodon monoceros		Monodon	monoceros						Thule			Denmark
CN 3 Phocoena phocoena		Phocoena	phocoena									Denmark
CN 583 Phocoena phocoena		Phocoena	phocoena						Samsø			Denmark
CN1 Phocoena phocoena		Phocoena	phocoena						Jægerspris			Denmark
CN 935 Balaenoptera physalus		Balaenoptera	physalus						Væangesø-hvalen			Denmark
MCE 1604 Balaenoptera physalus		Balaenoptera	physalus						Bornholm			Denmark			stranded
unnumbered Balaenoptera physalus		Balaenoptera	physalus						Bornholm			Denmark			stranded
CN 4 Lagenorhynchus acutus		Lagenorhynchus	acutus									Faroe Islands	Japetus Steenstrup	Det zootomisk physiologiske museum
CN 15 Balaenoptera musculus		Balaenoptera	musculus									Faroe Islands
CN 907 Hyperoodon ampullatus	MCE 1634	Hyperoodon	ampullatus						Möllemort			Germany	"fra Landbruksskolens samlinger"
CN 22 Monodon monoceros		Monodon	monoceros		Foe						Umanak	Greenland	Fleischer
CN 1 Lagenorhynchus albirostris		Lagenorhynchus	albirostris									Greenland	Holbøll
CN 8 Monodon monoceros		Monodon	monoceros									Greenland	Holbøll
CN 47 Monodon monoceros		Monodon	monoceros								Thule	Greenland	P. Frenchen
CN 2 Delphinapterus leucas		Delphinapterus	leucas		Juv							Greenland
MCE 1255 Delphinapterus leucas		Delphinapterus	leucas									Greenland
MCE 1385 Monodon monoceros		Monodon	monoceros						Thule			Greenland
MCE 1388 Monodon monoceros		Monodon	monoceros						Thule			Greenland
76 Phocoena phocoena		Phocoena	phocoena									Greenland
77 Phocoena phocoena		Phocoena	phocoena									Greenland
CN 10 Phocoena phocoena		Phocoena	phocoena									Greenland
CN 12 Phocoena phocoena		Phocoena	phocoena									Greenland
CN 541 Phocoena phocoena		Phocoena	phocoena									Greenland
CN 543 Phocoena phocoena		Phocoena	phocoena									Greenland
CN 544 Phocoena phocoena		Phocoena	phocoena									Greenland
CN 545 Phocoena phocoena		Phocoena	phocoena									Greenland
CN 546 Phocoena phocoena		Phocoena	phocoena									Greenland
CN 547 Phocoena phocoena		Phocoena	phocoena									Greenland
CN 548 Phocoena phocoena		Phocoena	phocoena									Greenland
CN 549 Phocoena phocoena		Phocoena	phocoena									Greenland
CN 550 Phocoena phocoena		Phocoena	phocoena									Greenland
CN 551 Phocoena phocoena		Phocoena	phocoena									Greenland
CN 552 Phocoena phocoena		Phocoena	phocoena									Greenland
CN 553 Phocoena phocoena		Phocoena	phocoena									Greenland
CN 554 Phocoena phocoena		Phocoena	phocoena									Greenland
CN 555 Phocoena phocoena		Phocoena	phocoena									Greenland
CN 556 Phocoena phocoena		Phocoena	phocoena									Greenland
CN 557 Phocoena phocoena		Phocoena	phocoena									Greenland
CN 560 Phocoena phocoena		Phocoena	phocoena									Greenland
CN 561 Phocoena phocoena		Phocoena	phocoena									Greenland
CN 562 Phocoena phocoena		Phocoena	phocoena									Greenland
CN 563 Phocoena phocoena		Phocoena	phocoena									Greenland
CN 564 Phocoena phocoena		Phocoena	phocoena									Greenland
CN 565 Phocoena phocoena		Phocoena	phocoena									Greenland
CN 566 Phocoena phocoena		Phocoena	phocoena									Greenland
CN 567 Phocoena phocoena		Phocoena	phocoena									Greenland
CN 568 Phocoena phocoena		Phocoena	phocoena									Greenland
CN 570 Phocoena phocoena		Phocoena	phocoena									Greenland
CN 571 Phocoena phocoena		Phocoena	phocoena									Greenland
CN 572 Phocoena phocoena		Phocoena	phocoena									Greenland
CN 573 Phocoena phocoena		Phocoena	phocoena									Greenland
CN 574 Phocoena phocoena		Phocoena	phocoena									Greenland
CN 575 Phocoena phocoena		Phocoena	phocoena									Greenland
CN 617 Phocoena phocoena		Phocoena	phocoena									Greenland
CN 618 Phocoena phocoena		Phocoena	phocoena									Greenland
CN 619 Phocoena phocoena		Phocoena	phocoena									Greenland
CN 620 Phocoena phocoena		Phocoena	phocoena									Greenland
CN 621 Phocoena phocoena		Phocoena	phocoena									Greenland
CN 622 Phocoena phocoena		Phocoena	phocoena									Greenland
CN 623 Phocoena phocoena		Phocoena	phocoena									Greenland
CN 624 Phocoena phocoena		Phocoena	phocoena									Greenland
CN 625 Phocoena phocoena		Phocoena	phocoena									Greenland
CN 626 Phocoena phocoena		Phocoena	phocoena									Greenland
CN 627 Phocoena phocoena		Phocoena	phocoena									Greenland
CN 628 Phocoena phocoena		Phocoena	phocoena									Greenland
CN 628 Phocoena phocoena		Phocoena	phocoena									Greenland
CN 629 Phocoena phocoena		Phocoena	phocoena									Greenland
CN 630 Phocoena phocoena		Phocoena	phocoena									Greenland
CN 631 Phocoena phocoena		Phocoena	phocoena									Greenland
CN 632 Phocoena phocoena		Phocoena	phocoena									Greenland
CN 633 Phocoena phocoena		Phocoena	phocoena									Greenland
CN 634 Phocoena phocoena		Phocoena	phocoena									Greenland
CN 635 Phocoena phocoena		Phocoena	phocoena									Greenland
CN 636 Phocoena phocoena		Phocoena	phocoena									Greenland
CN 637 Phocoena phocoena		Phocoena	phocoena									Greenland
CN 638 Phocoena phocoena		Phocoena	phocoena									Greenland
CN 639 Phocoena phocoena		Phocoena	phocoena									Greenland
CN 641 Phocoena phocoena		Phocoena	phocoena									Greenland
CN 642 Phocoena phocoena		Phocoena	phocoena									Greenland
CN 643 Phocoena phocoena		Phocoena	phocoena									Greenland
CN 644 Phocoena phocoena		Phocoena	phocoena									Greenland
CN 653 Phocoena phocoena		Phocoena	phocoena									Greenland
CN 654 Phocoena phocoena		Phocoena	phocoena									Greenland
CN 657 Phocoena phocoena		Phocoena	phocoena									Greenland
CN 658 Phocoena phocoena		Phocoena	phocoena									Greenland
CN 659 Phocoena phocoena		Phocoena	phocoena									Greenland
CN 660 Phocoena phocoena		Phocoena	phocoena									Greenland
CN 660 Phocoena phocoena		Phocoena	phocoena									Greenland
CN 79 Phocoena phocoena		Phocoena	phocoena									Greenland
CN 8 Phocoena phocoena		Phocoena	phocoena									Greenland
CN 9 Phocoena phocoena		Phocoena	phocoena									Greenland
unnumbered box with bullae												Greenland
CN 2 Platanista gangetica		Platanista	gangetica								Serampore	India	Dr, Mundt
CN 12 Balaenoptera acutorostrata		Balaenoptera	acutorostrata		Foe					Bergen		Norway
CN 720 Phocoena phocoena		Phocoena	phocoena									Norway
CN 721 Phocoena phocoena		Phocoena	phocoena									Norway
CN 722 Phocoena phocoena		Phocoena	phocoena									Norway
CN 723 Phocoena phocoena		Phocoena	phocoena									Norway
CN 724 Phocoena phocoena		Phocoena	phocoena									Norway
CN 725 Phocoena phocoena		Phocoena	phocoena									Norway
CN 726 Phocoena phocoena		Phocoena	phocoena									Norway
CN 727 Phocoena phocoena		Phocoena	phocoena									Norway
CN 728 Phocoena phocoena		Phocoena	phocoena									Norway
CN 729 Phocoena phocoena		Phocoena	phocoena									Norway
CN 730 Phocoena phocoena		Phocoena	phocoena									Norway
CN 731 Phocoena phocoena		Phocoena	phocoena									Norway
CN 732 Phocoena phocoena		Phocoena	phocoena									Norway
CN 733 Phocoena phocoena		Phocoena	phocoena									Norway
CN 734 Phocoena phocoena		Phocoena	phocoena									Norway
CN 735 Phocoena phocoena		Phocoena	phocoena									Norway
CN 736 Phocoena phocoena		Phocoena	phocoena									Norway
CN 5 Steno rostratus		Steno	bredanensis									Pacific Ocean
CN 7 Pseudorca crassidens		Pseudorca	crassidens									Sri Lanka	Dana-exp. 1928-30. Carlsbergfondets ocean- expediction. 1.7.1931
CN 20 Stenella sp.		Stenella	?									St. Helena
MCE 1092 Orcaella grevirostris		Orcaella	brevirostris									Thailand	Bangsen Inst.of marine science, Burapha university
CN 3 Stenella attenuatus		Stenella	attenuata										Kapt. Kygom
unnumbered Globicephala melas		Globicephala	melas										Landbrukshøyskolen
CN 300 Lagenorhynchus albirostris		Lagenorhynchus	albirostris										Overført fra Studiesamlingen
unnumbered		?	?										Rømø, evt skoletjenesten
? CN 26 ?Balaenoptera physalus		?	?
2 additional, unmarked penises		?	?
CN 1288 ?		?	?
CN 16 Balaena mysticetus		?	?
CN 5		?	?
CN 850		?	?
CN 915	found w CN 935	?	?
CN 928		?	?
CN 933		?	?
div boxes I cannot access or identify		?	?
MCE 1596		?	?
nr. 315 "Hygoms delfin"		?	?
unnumbered		?	?
unnumbered		?	?
unnumbered		?	?
unnumbered 4 boxes with bones		?	?
unnumbered baleen		?	?
unnumbered bones		?	?
unnumbered Cetacea		?	?
unnumbered div		?	?
unnumbered four partial forefins "uden oplysninger"		?	?
unnumbered mandibles - 7 stk		?	?
unnumbered maybe number 4 - smaller skull + scapulae + forefins + ribs + complete v column		?	?
unnumbered of baleen		?	?
unnumbered one hyoid, two hyoid		?	?
unnumbered posterior half of skull		?	?
unnumbered set of cervical vertebrae		?	?
ZMUCMETA 089102		?	?
MANY more baleen whale bullae		?	?
unnumbered box w partial bones Balaenoptera physalus "musculus"		Balaenoptera	?
M 1687 Delphinus		Delphinus	?
CN 5 Prodelphinus petrosii		Lagenorhynchus	?
CN 9 Prodelphinus sp.		Stenella	?
CN 1 Tursiops catalana		Tursiops	?
CN 2 Tursiops catalana		Tursiops	?
ZMUCMETA 089017		? Balaenoptera	? Acutorostrata
unnumbered ? Physeter macrocephalus		? Physeter	? Macrocephalus
CN 13 Balaenoptera acutorostrata		Balaenoptera	acutorostrata		Foe
CN 12 Balaenoptera acutorostrata		Balaenoptera	acutorostrata
CN 19 Balaenoptera acutorostrata		Balaenoptera	acutorostrata
CN 20 Balaenoptera acutorostrata		Balaenoptera	acutorostrata
CN 21 Balaenoptera acutorostrata		Balaenoptera	acutorostrata
CN 25 Balaenoptera acutorostrata		Balaenoptera	acutorostrata
CN 26 Balaenoptera acutorostrata		Balaenoptera	acutorostrata
CN 306 Balaenoptera acutorostrata		Balaenoptera	acutorostrata
CN 434 Balaenoptera acutorostrata		Balaenoptera	acutorostrata
CN 92 Balaenoptera acutorostrata		Balaenoptera	acutorostrata
CN 920 Balaenoptera acutorostrata		Balaenoptera	acutorostrata												"Fra Nat.hist. museum Århus"
CN 921 Balaenoptera acutorostrata		Balaenoptera	acutorostrata
CN 922 Balaenoptera acutorostrata		Balaenoptera	acutorostrata
CN 924 Balaenoptera acutorostrata		Balaenoptera	acutorostrata
CN 925 Balaenoptera acutorostrata		Balaenoptera	acutorostrata
M 1088 Balaenoptera acutorostrata		Balaenoptera	acutorostrata
M 1718 Balaenoptera acutorostrata		Balaenoptera	acutorostrata
M 1721 Balaenoptera acutorostrata		Balaenoptera	acutorostrata
M 1722 Balaenoptera acutorostrata		Balaenoptera	acutorostrata
MCE 1232 Balaenoptera acutorostrata		Balaenoptera	acutorostrata
MCE 1270 Balaenoptera acutorostrata		Balaenoptera	acutorostrata
MCE 1577 Balaenoptera acutorostrata		Balaenoptera	acutorostrata
MCE 1678 Balaenoptera acutorostrata		Balaenoptera	acutorostrata
unnumbered Balaenoptera acutorostrata		Balaenoptera	acutorostrata												"fra ældre tid I museet. "
unnumbered Balaenoptera acutorostrata		Balaenoptera	acutorostrata
CN 1 Lagenorhynchus acutus		Lagenorhynchus	acutus
CN 18 Lagenorhynchus acutus		Lagenorhynchus	acutus
CN 19 Lagenorhynchus acutus	2 boxes	Lagenorhynchus	acutus
CN 20 Lagenorhynchus acutus		Lagenorhynchus	acutus
CN 23 Lagenorhynchus acutus		Lagenorhynchus	acutus
CN 24 Lagenorhynchus acutus		Lagenorhynchus	acutus
CN 270 Lagenorhynchus acutus		Lagenorhynchus	acutus
CN 273 Lagenorhynchus acutus		Lagenorhynchus	acutus
CN 27 Lagenorhynchus albirostris		Lagenorhynchus	albirostris		Juv
1095 Lagenorhynchus albirostris	hvirvler	Lagenorhynchus	albirostris
CN 1258 Lagenorhynchus albirostris		Lagenorhynchus	albirostris
CN 1639 Lagenorhynchus albirostris		Lagenorhynchus	albirostris
CN 1690 Lagenorhynchus albirostris		Lagenorhynchus	albirostris
CN 24 Lagenorhynchus albirostris		Lagenorhynchus	albirostris
CN 25 Lagenorhynchus albirostris		Lagenorhynchus	albirostris
CN 258 Lagenorhynchus albirostris	2 boxes	Lagenorhynchus	albirostris
CN 26 Lagenorhynchus albirostris		Lagenorhynchus	albirostris
CN 28 Lagenorhynchus albirostris		Lagenorhynchus	albirostris
CN 29 Lagenorhynchus albirostris		Lagenorhynchus	albirostris
CN 30 Lagenorhynchus albirostris		Lagenorhynchus	albirostris
CN 34 Lagenorhynchus albirostris		Lagenorhynchus	albirostris
CN 35 Lagenorhynchus albirostris		Lagenorhynchus	albirostris
CN 360 Lagenorhynchus albirostris	2 boxes + cranium	Lagenorhynchus	albirostris
CN 433 Lagenorhynchus albirostris		Lagenorhynchus	albirostris
CN 600 Lagenorhynchus albirostris		Lagenorhynchus	albirostris
CN 7 Lagenorhynchus albirostris		Lagenorhynchus	albirostris
CN 70 Lagenorhynchus albirostris		Lagenorhynchus	albirostris
CN 740 Lagenorhynchus albirostris		Lagenorhynchus	albirostris
CN 797 Lagenorhynchus albirostris		Lagenorhynchus	albirostris
CN 8 Lagenorhynchus albirostris		Lagenorhynchus	albirostris
CN 802 Lagenorhynchus albirostris		Lagenorhynchus	albirostris
CN 818 Lagenorhynchus albirostris		Lagenorhynchus	albirostris
CN 888 Lagenorhynchus albirostris	skelet - kranium	Lagenorhynchus	albirostris
CN 898 Lagenorhynchus albirostris		Lagenorhynchus	albirostris
CN 914 Lagenorhynchus albirostris		Lagenorhynchus	albirostris
CN 94 Lagenorhynchus albirostris		Lagenorhynchus	albirostris
M 1067 Lagenorhynchus albirostris	2 bokser	Lagenorhynchus	albirostris
M 1643 Lagenorhynchus albirostris		Lagenorhynchus	albirostris
M 1692 Lagenorhynchus albirostris		Lagenorhynchus	albirostris
M 1696 Lagenorhynchus albirostris		Lagenorhynchus	albirostris
M 1703 Lagenorhynchus albirostris	complete	Lagenorhynchus	albirostris
M 1704 Lagenorhynchus albirostris	complete, 2 boxes	Lagenorhynchus	albirostris
M 1705 Lagenorhynchus albirostris		Lagenorhynchus	albirostris
M 1706 Lagenorhynchus albirostris		Lagenorhynchus	albirostris
M 1707 Lagenorhynchus albirostris		Lagenorhynchus	albirostris
M 1708 Lagenorhynchus albirostris		Lagenorhynchus	albirostris
M 1709 Lagenorhynchus albirostris		Lagenorhynchus	albirostris
M 1710 Lagenorhynchus albirostris		Lagenorhynchus	albirostris
M 1711 Lagenorhynchus albirostris		Lagenorhynchus	albirostris
M 1712 Lagenorhynchus albirostris		Lagenorhynchus	albirostris
M 1713 Lagenorhynchus albirostris		Lagenorhynchus	albirostris
M 1714 Lagenorhynchus albirostris		Lagenorhynchus	albirostris
M 1716 Lagenorhynchus albirostris		Lagenorhynchus	albirostris
M1688 Lagenorhynchus albirostris		Lagenorhynchus	albirostris
M1689 Lagenorhynchus albirostris		Lagenorhynchus	albirostris
M1691 Lagenorhynchus albirostris		Lagenorhynchus	albirostris
MCE 1094 Lagenorhynchus albirostris		Lagenorhynchus	albirostris
MCE 1245 Lagenorhynchus albirostris		Lagenorhynchus	albirostris
MCE 1254 Lagenorhynchus albirostris		Lagenorhynchus	albirostris
MCE 1256 Lagenorhynchus albirostris	2 boxes	Lagenorhynchus	albirostris
MCE 1257 Lagenorhynchus albirostris		Lagenorhynchus	albirostris
MCE 1259 Lagenorhynchus albirostris		Lagenorhynchus	albirostris
MCE 1261 Lagenorhynchus albirostris		Lagenorhynchus	albirostris
MCE 1262 Lagenorhynchus albirostris		Lagenorhynchus	albirostris
MCE 1263 Lagenorhynchus albirostris		Lagenorhynchus	albirostris
MCE 1264 Lagenorhynchus albirostris	box + skull	Lagenorhynchus	albirostris
MCE 1265 Lagenorhynchus albirostris		Lagenorhynchus	albirostris
MCE 1267 Lagenorhynchus albirostris		Lagenorhynchus	albirostris
MCE 1268 Lagenorhynchus albirostris		Lagenorhynchus	albirostris
MCE 1276 Lagenorhynchus albirostris	2 boxes	Lagenorhynchus	albirostris
MCE 1304 Lagenorhynchus albirostris		Lagenorhynchus	albirostris
MCE 1305 Lagenorhynchus albirostris		Lagenorhynchus	albirostris
MCE 1595 Lagenorhynchus albirostris	2 boxes	Lagenorhynchus	albirostris
MCE 798 Lagenorhynchus albirostris		Lagenorhynchus	albirostris
CN 15 Hyperoodon ampullatus		Hyperoodon	ampullatus
CN 16 Hyperoodon ampullatus		Hyperoodon	ampullatus
CN 18 Hyperoodon ampullatus		Hyperoodon	ampullatus
CN 19 Hyperoodon ampullatus		Hyperoodon	ampullatus
CN 2 Hyperoodon ampullatus		Hyperoodon	ampullatus
CN 20 Hyperoodon ampullatus		Hyperoodon	ampullatus
CN 23 Hyperoodon ampullatus		Hyperoodon	ampullatus
CN 24 Hyperoodon ampullatus		Hyperoodon	ampullatus
CN 7 Hyperoodon ampullatus		Hyperoodon	ampullatus
CN 9 Hyperoodon ampullatus		Hyperoodon	ampullatus
CN 908 Hyperoodon ampullatus		Hyperoodon	ampullatus
Hyperoodon ampullatus no data		Hyperoodon	ampullatus
Berardius arnuxii		Berardius	arnuxii
CN 1 Berardius arnouxii		Berardius	arnuxii
CN 1 Stenella sp. attenuata		Stenella	attenuata
CN 268 Stenella attenuata		Stenella	attenuata
CN 8 Prodelphinus attenuatus		Stenella	attenuata
CN 5 Mesoplodon bidens		Mesoplodon	bidens
CN 7 Mesoplodon bidens		Mesoplodon	bidens
CN 8 Mesoplodon bidens		Mesoplodon	bidens
CN 901 Mesoplodon bidens		Mesoplodon	bidens
CN1 Mesoplodon bidens		Mesoplodon	bidens
M 1677 Mesoplodon bidens		Mesoplodon	bidens
M 1717 Mesoplodon bidens		Mesoplodon	bidens
M 901 Mesoplodon bidens		Mesoplodon	bidens
? Steno bredaensis		Steno	bredanensis
CN 4 Steno rostratus		Steno	bredanensis
M 1720 Ziphius cavirostris		Ziphius	cavirostris
CN 1 Prodelphinus euphrosyne		Stenella	coerualba
CN 7 Prodelphinus euphrosyne		Stenella	coerualba
CN 9 Prodelphinus euphrosyne		Stenella	coerualba
CN 18 Stenella coeruleoalba		Stenella	coeruleoalba
CN 5 Pseudorca crassidens		Pseudorca	crassidens
CN 6 Pseudorca crassidens		Pseudorca	crassidens
CN 1 Pseudorca crassidens		Pseudorca	crassidens
CN 3 Pseudorca crassidens		Pseudorca	crassidens
CN 4 Pseudorca crassidens		Pseudorca	crassidens
CN 906 Pseudorca crassidens		Pseudorca	crassidens
CN 943 Pseduorca crassidens		Pseudorca	crassidens
CN 11 Delphinus delphis		Delphinus	delphis
CN 21 Delphinus delphis		Delphinus	delphis
CN 22 Delphinus delphis		Delphinus	delphis
CN 23 Delphinus delphis		Delphinus	delphis
CN 264 Delphinus delphis		Delphinus	delphis
CN 265 Delphinus delphis		Delphinus	delphis
CN 266 Delphinus delphis		Delphinus	delphis
CN 267 Delphinus delphis		Delphinus	delphis
CN 28 Delphinus delphis		Delphinus	delphis
CN 32 Delphinus delphis		Delphinus	delphis
CN 33 Delphinus delphis		Delphinus	delphis
CN 34 Delphinus delphis		Delphinus	delphis
CN 35 Delphinus delphis		Delphinus	delphis
CN 36 Delphinus delphis		Delphinus	delphis
CN 38 Delphinus delphis		Delphinus	delphis
CN 39 Delphinus delphis		Delphinus	delphis
CN 4 (47) Delphinus delphis		Delphinus	delphis
CN 41 Delphinus delphis		Delphinus	delphis
CN 42 Delphinus delphis		Delphinus	delphis
CN 43 Delphinus delphis		Delphinus	delphis
CN 5 (48) Delphinus delphis		Delphinus	delphis
CN 5 Delphinus delphis		Delphinus	delphis
CN 6 Delphinus delphis		Delphinus	delphis
CN 7 Delphinus delphis		Delphinus	delphis
M 1665 Delphinus delphis		Delphinus	delphis
M 1697 Delphinus delphis		Delphinus	delphis
M 1719 Delphinus delphis		Delphinus	delphis
MCE 1291 Delphinus delphis		Delphinus	delphis
MCE 1293 Delphinus delphis		Delphinus	delphis
MCE 1629 Delphinus delphis		Delphinus	delphis												Eschricht collection of innominates
CN 2 Stenella frontalis		Stenella	frontalis
CN 20 Prodephinus fraenatus		Stenella	frontalis
CN 1 Inia geoffrensis		Inia	geoffrensis
CN 2 Inia geoffrensis		Inia	geoffrensis
CN 35 Eubalaena glacialis		Eubalaena	glacialis
CN 1 Mesoplodon grayi		Mesoplodon	grayi
CN 1 Grampus griseus		Grampus	griseus
CN 3 Grampus griseus		Grampus	griseus
MCE 1614 Delphinapterus leucas		Delphinapterus	leucas		Ad										Eschricht collection of innominates
? CN 5 Delphinapterus leucas		Delphinapterus	leucas
CN 3 Delphinapterus leucas		Delphinapterus	leucas
CN 44 Delphinapterus leucas		Delphinapterus	leucas
MCE 1616 Delphinapterus leucas		Delphinapterus	leucas												Eschricht collection of innominates
MCE 1617 Delphinapterus leucas		Delphinapterus	leucas												Eschricht collection of innominates
MCE 1618 Delphinapterus leucas		Delphinapterus	leucas												Eschricht collection of innominates
MCE 1619 Delphinapterus leucas		Delphinapterus	leucas												Eschricht collection of innominates
MCE 1620 Delphinapterus leucas		Delphinapterus	leucas												Eschricht collection of innominates
MCE 1621 Delphinapterus leucas		Delphinapterus	leucas												Eschricht collection of innominates
CN 10 Delphinapterus leucas		Delphinapterus	leucas
CN 11 Delphinapterus leucas		Delphinapterus	leucas
CN 12 Delphinapterus leucas		Delphinapterus	leucas
CN 13 Delphinapterus leucas		Delphinapterus	leucas
CN 279 Delphinapterus leucas		Delphinapterus	leucas
CN 280 Delphinapterus leucas		Delphinapterus	leucas
CN 335 Delphinapterus leucas		Delphinapterus	leucas
CN 34 Delphinapterus leucas		Delphinapterus	leucas
CN 37 Delphinapterus leucas		Delphinapterus	leucas
CN 39 Delphinapterus leucas		Delphinapterus	leucas
CN 40 Delphinapterus leucas		Delphinapterus	leucas
CN 41 Delphinapterus leucas		Delphinapterus	leucas
CN 42 Delphinapterus leucas		Delphinapterus	leucas
CN 45 Delphinapterus leucas		Delphinapterus	leucas
CN 47 Delphinapterus leucas		Delphinapterus	leucas
CN 48 Delphinapterus leucas		Delphinapterus	leucas
CN 50 Delphinapterus leucas		Delphinapterus	leucas
CN 52 Delphinapterus leucas		Delphinapterus	leucas
CN 53 Delphinapterus leucas		Delphinapterus	leucas
CN 54 Delphinapterus leucas		Delphinapterus	leucas
CN 55 Delphinapterus leucas		Delphinapterus	leucas
CN 56 Delphinapterus leucas		Delphinapterus	leucas
CN 57 Delphinapterus leucas		Delphinapterus	leucas
CN 58 Delphinapterus leucas		Delphinapterus	leucas
CN 59 Delphinapterus leucas		Delphinapterus	leucas
CN 6 Delphinapterus leucas		Delphinapterus	leucas
CN 60 Delphinapterus leucas		Delphinapterus	leucas
CN 63 Delphinapterus leucas		Delphinapterus	leucas
CN 64 Delphinapterus leucas		Delphinapterus	leucas
CN 67 Delphinapterus leucas		Delphinapterus	leucas
CN 70 Delphinapterus leucas		Delphinapterus	leucas
CN 717 Delphinapterus leucas		Delphinapterus	leucas
CN 723 Delphinapterus leucas		Delphinapterus	leucas
CN 9 Delphinapterus leucas		Delphinapterus	leucas
MCE 1306 Delphinapterus leucas		Delphinapterus	leucas
MCE 1310 Delphinapterus leucas		Delphinapterus	leucas
MCE 1310 Delphinapterus leucas		Delphinapterus	leucas
MCE 1311 Delphinapterus leucas		Delphinapterus	leucas
MCE 1312 Delphinapterus leucas		Delphinapterus	leucas
MCE 1313 Delphinapterus leucas		Delphinapterus	leucas
MCE 1314 Delphinapterus leucas		Delphinapterus	leucas
MCE 1315 Delphinapterus leucas		Delphinapterus	leucas
MCE 1316 Delphinapterus leucas		Delphinapterus	leucas
MCE 1317 Delphinapterus leucas		Delphinapterus	leucas
MCE 1319 Delphinapterus leucas		Delphinapterus	leucas
MCE 1320 Delphinapterus leucas		Delphinapterus	leucas
MCE 1321 Delphinapterus leucas		Delphinapterus	leucas
MCE 1322 Delphinapterus leucas		Delphinapterus	leucas
MCE 1323 Delphinapterus leucas		Delphinapterus	leucas
MCE 1324 Delphinapterus leucas		Delphinapterus	leucas
MCE 1325 Delphinapterus leucas		Delphinapterus	leucas
MCE 1326 Delphinapterus leucas		Delphinapterus	leucas
MCE 1327 Delphinapterus leucas		Delphinapterus	leucas
MCE 1328 Delphinapterus leucas		Delphinapterus	leucas
MCE 1329 Delphinapterus leucas		Delphinapterus	leucas
MCE 1330 Delphinapterus leucas		Delphinapterus	leucas
MCE 1331 Delphinapterus leucas		Delphinapterus	leucas
MCE 1332 Delphinapterus leucas		Delphinapterus	leucas
MCE 1333 Delphinapterus leucas		Delphinapterus	leucas
MCE 1334 Delphinapterus leucas		Delphinapterus	leucas
MCE 1335 Delphinapterus leucas		Delphinapterus	leucas
MCE 1336 Delphinapterus leucas		Delphinapterus	leucas
MCE 1337 Delphinapterus leucas		Delphinapterus	leucas
MCE 1338 Delphinapterus leucas		Delphinapterus	leucas
MCE 1339 Delphinapterus leucas		Delphinapterus	leucas
MCE 1340 Delphinapterus leucas		Delphinapterus	leucas
MCE 1341 Delphinapterus leucas		Delphinapterus	leucas
MCE 1342 Delphinapterus leucas		Delphinapterus	leucas
MCE 1343 Delphinapterus leucas		Delphinapterus	leucas
MCE 1344 Delphinapterus leucas		Delphinapterus	leucas
MCE 1345 Delphinapterus leucas		Delphinapterus	leucas
MCE 1346 Delphinapterus leucas		Delphinapterus	leucas
MCE 1347 Delphinapterus leucas		Delphinapterus	leucas
MCE 1348 Delphinapterus leucas		Delphinapterus	leucas
MCE 1349 Delphinapterus leucas		Delphinapterus	leucas
MCE 1350 Delphinapterus leucas		Delphinapterus	leucas
MCE 1351 Delphinapterus leucas		Delphinapterus	leucas
MCE 1352 Delphinapterus leucas		Delphinapterus	leucas
MCE 1353 Delphinapterus leucas		Delphinapterus	leucas
MCE 1354 Delphinapterus leucas		Delphinapterus	leucas
MCE 1355 Delphinapterus leucas		Delphinapterus	leucas
MCE 34 Delphinapterus leucas		Delphinapterus	leucas
MCE 61 Delphinapterus leucas		Delphinapterus	leucas
MCE 62 Delphinapterus leucas		Delphinapterus	leucas
MCE 63 Delphinapterus leucas		Delphinapterus	leucas
MCE 68 Delphinapterus leucas		Delphinapterus	leucas
CN 2 Physeter macrocephalus		Physeter	macrocephalus
CN 248 Physeter macrocephalus		Physeter	macrocephalus
CN 5 Physeter macrocephalus		Physeter	macrocephalus
CN 8 Physeter macrocephalus		Physeter	macrocephalus
CN 852 Physeter macrocephalus		Physeter	macrocephalus
CN 896 Physeter macrocephalus		Physeter	macrocephalus
CN 9 Physeter macrocephalus		Physeter	macrocephalus
CN 902 Physeter macrocephalus		Physeter	macrocephalus
M 1650 Physeter macrocephalus		Physeter	macrocephalus
M 1651 Physeter macrocephalus		Physeter	macrocephalus
M 1652 Physeter macrocephalus		Physeter	macrocephalus
M 1653 Physeter macrocephalus		Physeter	macrocephalus
M 1654 Physeter macrocephalus		Physeter	macrocephalus
M 1655 Physeter macrocephalus		Physeter	macrocephalus
M 1656 Physeter macrocephalus		Physeter	macrocephalus
M 1658 Physeter macrocephalus		Physeter	macrocephalus
M 1659 Physeter macrocephalus		Physeter	macrocephalus
M 1660 Physeter macrocephalus		Physeter	macrocephalus
M 1661 Physeter macrocephalus		Physeter	macrocephalus
M 1662 Physeter macrocephalus		Physeter	macrocephalus
M 1663 Physeter macrocephalus		Physeter	macrocephalus
MCE 1645 Physeter macrocephalus		Physeter	macrocephalus
unnumbered Physeter macrocephalus - very many mandibles cut in two		Physeter	macrocephalus
No 2 Globicephala macrohynchus		Globicephala	macrohynchus
1098 Globicephala melas		Globicephala	melas
1099 Globicephala melas		Globicephala	melas
1292 Globicephala melas		Globicephala	melas
CN 22 Globicephala melas		Globicephala	melas
CN 3 Globicephala melas		Globicephala	melas
CN 39 Globicephala melas		Globicephala	melas
CN 403 Globicephala melas		Globicephala	melas
CN 44 Globicephala melas		Globicephala	melas
CN 46 Globicephala melas		Globicephala	melas
CN 47 Globicephala melas		Globicephala	melas
CN 49 Globicephala melas		Globicephala	melas
CN 50 Globicephala melas		Globicephala	melas
CN 51 Globicephala melas		Globicephala	melas
CN 62 Globicephala melas		Globicephala	melas
CN 68 Globicephala melas		Globicephala	melas
CN 743 Globicephala melas		Globicephala	melas
CN 9 Globicephala melas		Globicephala	melas
CN 911 Globicephala melas		Globicephala	melas
CN 912 Globicephala melas		Globicephala	melas
M 1308 Globicephala melas		Globicephala	melas
M 1598 Globicephala melas		Globicephala	melas
M 1700 Globicephala melas		Globicephala	melas
M1100 Globicephala melas		Globicephala	melas
M1101 Globicephala melas		Globicephala	melas
unnumbered Globicephala melas		Globicephala	melas
CN 425 Globicephala melas		Globicephala	melas
CN 913 Globicephala melas		Globicephala	melas
MCE 1098 Globicephala melas		Globicephala	melas
MCE 1100 Globicephala melas		Globicephala	melas
MCE 1101 Globicephala melas		Globicephala	melas
MCE 1120 Phocoena phocoena		Globicephala	melas
MCE 1466 Globicephala melas		Globicephala	melas
MCE 1467 Globicephala melas		Globicephala	melas
MCE 1468 Globicephala melas		Globicephala	melas
MCE 1575 Globicephala melas		Globicephala	melas
MCE 1598 Globicephala melas		Globicephala	melas
MCE 1599 Globicephala melas		Globicephala	melas
MCE 1600 Globicephala melas		Globicephala	melas
MCE 1601 Globicephala melas		Globicephala	melas
MCE 1602 or 5 Globicephala melas		Globicephala	melas
MCE 1622 Globicephala melas		Globicephala	melas												Eschricht collection of innominates
MCE 1623 Globicephala melas		Globicephala	melas												Eschricht collection of innominates
MCE 1624 Globicephala melas		Globicephala	melas												Eschricht collection of innominates
MCE 1625 Globicephala melas		Globicephala	melas												Eschricht collection of innominates
CN 281 Monodon monoceros		Monodon	monoceros		Juv
CN 1 Monodon monoceros		Monodon	monoceros
CN 10 Monodon monoceros		Monodon	monoceros
CN 13 Monodon monoceros		Monodon	monoceros
CN 14 Monodon monoceros		Monodon	monoceros
CN 15 Monodon monoceros		Monodon	monoceros
CN 19 Monodon monoceros		Monodon	monoceros
CN 20 Monodon monoceros		Monodon	monoceros
CN 21 ? Monodon monoceros		Monodon	monoceros
CN 21 Monodon monoceros		Monodon	monoceros
CN 22 Monodon monoceros		Monodon	monoceros
CN 23 Monodon monoceros		Monodon	monoceros
CN 24 Monodon monoceros		Monodon	monoceros
CN 2614 Monodon monoceros		Monodon	monoceros
CN 2620 Monodon monoceros		Monodon	monoceros
CN 282 Monodon monoceros		Monodon	monoceros
CN 37 Monodon monoceros		Monodon	monoceros
CN 43 Monodon monoceros		Monodon	monoceros
CN 493 Monodon monoceros		Monodon	monoceros
CN 52 Monodon monoceros		Monodon	monoceros
CN 53 Monodon monoceros		Monodon	monoceros
CN 56 Monodon monoceros		Monodon	monoceros
CN 58 Monodon monoceros		Monodon	monoceros
CN 7 Monodon monoceros		Monodon	monoceros
CN 74 Monodon monoceros		Monodon	monoceros
CN 76 Monodon monoceros		Monodon	monoceros
CN 9 Monodon monoceros		Monodon	monoceros
FM 4.2-7 Monodon monoceros		Monodon	monoceros
GN Aqqalu #9 Monodon monoceros		Monodon	monoceros
M 1358 Monodon monoceros		Monodon	monoceros
M 1359 Monodon monoceros		Monodon	monoceros
M 1359 Monodon monoceros		Monodon	monoceros
M 1360 Monodon monoceros		Monodon	monoceros
M 1367 Monodon monoceros		Monodon	monoceros
M 1368 Monodon monoceros		Monodon	monoceros
M 1394 Monodon monoceros		Monodon	monoceros
M 1399 Monodon monoceros		Monodon	monoceros
MCE 1360 Monodon monoceros		Monodon	monoceros
MCE 1361 Monodon monoceros		Monodon	monoceros
MCE 1363 Monodon monoceros		Monodon	monoceros
MCE 1364 Monodon monoceros		Monodon	monoceros
MCE 1365 Monodon monoceros		Monodon	monoceros
MCE 1366 Monodon monoceros		Monodon	monoceros
MCE 1369 Monodon monoceros		Monodon	monoceros
MCE 1371 Monodon monoceros		Monodon	monoceros
MCE 1372 Monodon monoceros		Monodon	monoceros
MCE 1373 Monodon monoceros		Monodon	monoceros
MCE 1374 Monodon monoceros		Monodon	monoceros
MCE 1377 Monodon monoceros		Monodon	monoceros
MCE 1384 Monodon monoceros		Monodon	monoceros
MCE 1386 Monodon monoceros		Monodon	monoceros
MCE 1387 Monodon monoceros		Monodon	monoceros
MCE 1389 Monodon monoceros		Monodon	monoceros
MCE 1398 Monodon monoceros		Monodon	monoceros
MCE 1404 Monodon monoceros		Monodon	monoceros
MCE 1405 Monodon monoceros		Monodon	monoceros
MCE 1406 Monodon monoceros		Monodon	monoceros
MCE 1407 Monodon monoceros		Monodon	monoceros
MCE 1408 Monodon monoceros		Monodon	monoceros
MCE 1409 Monodon monoceros		Monodon	monoceros
MCE 1410 Monodon monoceros		Monodon	monoceros
MCE 1411 Monodon monoceros		Monodon	monoceros
MCE 1412 Monodon monoceros		Monodon	monoceros
MCE 1413 Monodon monoceros		Monodon	monoceros
MCE 1414 Monodon monoceros		Monodon	monoceros
unnumbered Monodon monoceros		Monodon	monoceros
unnummbered Monodon monoceros		Monodon	monoceros
		Monodon	monoceros
CN 10 Balaenoptera musculus		Balaenoptera	musculus
CN 11 Balaenoptera musculus		Balaenoptera	musculus
CN 12 Balaenoptera musculus		Balaenoptera	musculus
CN 13 Balaenoptera musculus		Balaenoptera	musculus
CN 14 Balaenoptera musculus		Balaenoptera	musculus
CN 16 Balaenoptera musculus		Balaenoptera	musculus
CN 17 Balaenoptera musculus		Balaenoptera	musculus
CN 22 Balaenoptera musculus		Balaenoptera	musculus
unnumbered Balaenoptera musculus		Balaenoptera	musculus
unnumbered Balaena mysticetus		Balaena	mysticetus		Foe
CN 18 Balaena mysticetus		Balaena	mysticetus
CN 19 Balaena mysticetus		Balaena	mysticetus
CN 20 Balaena mysticetus		Balaena	mysticetus
CN 21 Balaena mysticetus		Balaena	mysticetus
CN 22 Balaena mysticetus		Balaena	mysticetus
CN 23 Balaena mysticetus		Balaena	mysticetus
CN 24 Balaena mysticetus		Balaena	mysticetus
CN 25 Balaena mysticetus		Balaena	mysticetus
CN 26 Balaena mysticetus		Balaena	mysticetus
CN 27 Balaena mysticetus		Balaena	mysticetus
CN 28 Balaena mysticetus		Balaena	mysticetus
CN 29 Balaena mysticetus		Balaena	mysticetus
CN 30 Balaena mysticetus		Balaena	mysticetus
CN 31 Balaena mysticetus		Balaena	mysticetus
CN 32 Balaena mysticetus		Balaena	mysticetus
CN 33 Balaena mysticetus		Balaena	mysticetus
CN 34 Balaena mysticetus		Balaena	mysticetus
CN 38 (yes, two specimens w same no!) Balaena mysticetus		Balaena	mysticetus
CN 8 Balaena mysticetus		Balaena	mysticetus
unnumbered Balaena mysticetus		Balaena	mysticetus
unnumbered Balaena mysticetus		Balaena	mysticetus
unnumbered Balaena mysticetus		Balaena	mysticetus
CN 14 Megaptera novaengliae		Megaptera	novaengliae		Foe
CN 1 Megaptera novaengliae		Megaptera	novaengliae
CN 14 Megaptera novaengliae		Megaptera	novaengliae
CN 23 Megaptera novaengliae		Megaptera	novaengliae
CN 24 Megaptera novaengliae		Megaptera	novaengliae
CN 25 Megaptera novaengliae		Megaptera	novaengliae
CN 26 Megaptera novaengliae		Megaptera	novaengliae
CN 27 Megaptera novaengliae		Megaptera	novaengliae
CN 28 Megaptera novaengliae		Megaptera	novaengliae
M 1698 Megaptera novaengliae		Megaptera	novaengliae
CN 10 Orcinus orca		Orcinus	orca
CN 1068 Orcinus orca		Orcinus	orca
CN 12 Orcinus orca		Orcinus	orca
CN 13 Orcinus orca		Orcinus	orca
CN 15 Orcinus orca		Orcinus	orca
CN 18 Orcinus orca		Orcinus	orca
CN 19 Orcinus orca		Orcinus	orca
CN 20 Orcinus orca		Orcinus	orca
CN 21 Orcinus orca		Orcinus	orca
CN 24 Orcinus orca		Orcinus	orca
CN 38 Orcinus orca		Orcinus	orca
CN 4 Orcinus orca		Orcinus	orca
CN 6 Orcinus orca		Orcinus	orca
CN 6 Orcinus orca		Orcinus	orca
CN 709 Orcinus orca		Orcinus	orca
M 11 Orcinus orca		Orcinus	orca
CN 17 Orcinus orca		Orcinus	orca
CN 22 Orcinus orca		Orcinus	orca
CN 25 Orcinus orca		Orcinus	orca
CN 26 Orcinus orca		Orcinus	orca
CN 27 Orcinus orca		Orcinus	orca
CN 28 Orcinus orca		Orcinus	orca
CN 29 Orcinus orca		Orcinus	orca
CN 30 Orcinus orca		Orcinus	orca
CN 31 Orcinus orca		Orcinus	orca
CN 33 Orcinus orca		Orcinus	orca
CN 34 Orcinus orca		Orcinus	orca
CN 35 Orcinus orca		Orcinus	orca
CN 37 Orcinus orca		Orcinus	orca
CN 8 Orcinus orca		Orcinus	orca
M 1637 Orcinus orca		Orcinus	orca
M 1638 Orcinus orca		Orcinus	orca
M 1646 Orcinus orca		Orcinus	orca
M 1648 Orcinus orca		Orcinus	orca
unnumbered Orcinus orca		Orcinus	orca
unnumbered Orcinus orca		Orcinus	orca
CN 705 Phocoena phocoena		Phocoena	phocoena		Foe
00/023 Phocoena phocoena		Phocoena	phocoena
73 Phocoena phocoena		Phocoena	phocoena
74 Phocoena phocoena		Phocoena	phocoena
75 Phocoena phocoena		Phocoena	phocoena
CN 1 Phocoena phocoena		Phocoena	phocoena
CN 13 Phocoena phocoena		Phocoena	phocoena
CN 144 Phocoena phocoena		Phocoena	phocoena
CN 16 Phocoena phocoena		Phocoena	phocoena
CN 2 Phocoena phocoena		Phocoena	phocoena
CN 220 Phocoena phocoena		Phocoena	phocoena
CN 235 Phocoena phocoena		Phocoena	phocoena
CN 236 Phocoena phocoena		Phocoena	phocoena
CN 237 Phocoena phocoena		Phocoena	phocoena
CN 238 Phocoena phocoena		Phocoena	phocoena
CN 239 Phocoena phocoena		Phocoena	phocoena
CN 240 Phocoena phocoena		Phocoena	phocoena
CN 241 Phocoena phocoena		Phocoena	phocoena
CN 253 Phocoena phocoena		Phocoena	phocoena
CN 254 Phocoena phocoena		Phocoena	phocoena
CN 255 Phocoena phocoena		Phocoena	phocoena
CN 260 Phocoena phocoena		Phocoena	phocoena
CN 283 Phocoena phocoena		Phocoena	phocoena
CN 284 Phocoena phocoena		Phocoena	phocoena
CN 285 Phocoena phocoena		Phocoena	phocoena
CN 286 Phocoena phocoena		Phocoena	phocoena
CN 287 Phocoena phocoena		Phocoena	phocoena
CN 288 Phocoena phocoena		Phocoena	phocoena
CN 289 Phocoena phocoena		Phocoena	phocoena
CN 290 Phocoena phocoena		Phocoena	phocoena
CN 291 Phocoena phocoena		Phocoena	phocoena
CN 292 Phocoena phocoena		Phocoena	phocoena
CN 293 Phocoena phocoena		Phocoena	phocoena
CN 294 Phocoena phocoena		Phocoena	phocoena
CN 295 Phocoena phocoena		Phocoena	phocoena
CN 296 Phocoena phocoena		Phocoena	phocoena
CN 297 Phocoena phocoena		Phocoena	phocoena
CN 298 Phocoena phocoena		Phocoena	phocoena
CN 303 Phocoena phocoena		Phocoena	phocoena
CN 304 Phocoena phocoena		Phocoena	phocoena
CN 305 Phocoena phocoena		Phocoena	phocoena
CN 309 Phocoena phocoena		Phocoena	phocoena
CN 318 Phocoena phocoena		Phocoena	phocoena
CN 325 Phocoena phocoena		Phocoena	phocoena
CN 326 Phocoena phocoena		Phocoena	phocoena
CN 327 Phocoena phocoena		Phocoena	phocoena
CN 328 Phocoena phocoena		Phocoena	phocoena
CN 330 Phocoena phocoena		Phocoena	phocoena
CN 333 Phocoena phocoena		Phocoena	phocoena
CN 335 Phocoena phocoena		Phocoena	phocoena
CN 337 Phocoena phocoena		Phocoena	phocoena
CN 339 Phocoena phocoena		Phocoena	phocoena
CN 340 Phocoena phocoena		Phocoena	phocoena
CN 342 Phocoena phocoena		Phocoena	phocoena
CN 346 Phocoena phocoena		Phocoena	phocoena
CN 347 Phocoena phocoena		Phocoena	phocoena
CN 348 Phocoena phocoena		Phocoena	phocoena
CN 349 Phocoena phocoena		Phocoena	phocoena
CN 351 Phocoena phocoena		Phocoena	phocoena
CN 356 Phocoena phocoena		Phocoena	phocoena
CN 361 Phocoena phocoena		Phocoena	phocoena
CN 363 Phocoena phocoena		Phocoena	phocoena
CN 364 Phocoena phocoena		Phocoena	phocoena
CN 376 Phocoena phocoena		Phocoena	phocoena
CN 381 Phocoena phocoena		Phocoena	phocoena
CN 383 Phocoena phocoena		Phocoena	phocoena
CN 384 Phocoena phocoena		Phocoena	phocoena
CN 386 Phocoena phocoena		Phocoena	phocoena
CN 387 Phocoena phocoena		Phocoena	phocoena
CN 389 Phocoena phocoena		Phocoena	phocoena
CN 391 Phocoena phocoena		Phocoena	phocoena
CN 393 Phocoena phocoena		Phocoena	phocoena
CN 397 Phocoena phocoena		Phocoena	phocoena
CN 401 Phocoena phocoena		Phocoena	phocoena
CN 402 Phocoena phocoena		Phocoena	phocoena
CN 416 Phocoena phocoena		Phocoena	phocoena
CN 418 Phocoena phocoena		Phocoena	phocoena
CN 419 Phocoena phocoena		Phocoena	phocoena
CN 420 Phocoena phocoena		Phocoena	phocoena
CN 427 Phocoena phocoena		Phocoena	phocoena
CN 429 Phocoena phocoena		Phocoena	phocoena
CN 430 Phocoena phocoena		Phocoena	phocoena
CN 431 Phocoena phocoena		Phocoena	phocoena
CN 435 Phocoena phocoena		Phocoena	phocoena
CN 437 Phocoena phocoena		Phocoena	phocoena
CN 447 Phocoena phocoena		Phocoena	phocoena
CN 456 Phocoena phocoena		Phocoena	phocoena
CN 461 Phocoena phocoena		Phocoena	phocoena
CN 464 Phocoena phocoena		Phocoena	phocoena
CN 465 Phocoena phocoena		Phocoena	phocoena
CN 466 Phocoena phocoena		Phocoena	phocoena
CN 467 Phocoena phocoena		Phocoena	phocoena
CN 468 Phocoena phocoena		Phocoena	phocoena
CN 469 Phocoena phocoena		Phocoena	phocoena
CN 470 Phocoena phocoena		Phocoena	phocoena
CN 471 Phocoena phocoena		Phocoena	phocoena
CN 472 Phocoena phocoena		Phocoena	phocoena
CN 473 Phocoena phocoena		Phocoena	phocoena
CN 474 Phocoena phocoena		Phocoena	phocoena
CN 475 Phocoena phocoena		Phocoena	phocoena
CN 476 Phocoena phocoena		Phocoena	phocoena
CN 477 Phocoena phocoena		Phocoena	phocoena
CN 481 Phocoena phocoena		Phocoena	phocoena
CN 482 Phocoena phocoena		Phocoena	phocoena
CN 483 Phocoena phocoena		Phocoena	phocoena
CN 491 Phocoena phocoena		Phocoena	phocoena
CN 492 Phocoena phocoena		Phocoena	phocoena
CN 493 Phocoena phocoena		Phocoena	phocoena
CN 494 Phocoena phocoena		Phocoena	phocoena
CN 495 Phocoena phocoena		Phocoena	phocoena
CN 496 Phocoena phocoena		Phocoena	phocoena
CN 497 Phocoena phocoena		Phocoena	phocoena
CN 498 Phocoena phocoena		Phocoena	phocoena
CN 499 Phocoena phocoena		Phocoena	phocoena
CN 5 Phocoena phocoena		Phocoena	phocoena
CN 500 Phocoena phocoena		Phocoena	phocoena
CN 501 Phocoena phocoena		Phocoena	phocoena
CN 502 Phocoena phocoena		Phocoena	phocoena
CN 503 Phocoena phocoena		Phocoena	phocoena
CN 504 Phocoena phocoena		Phocoena	phocoena
CN 506 Phocoena phocoena		Phocoena	phocoena
CN 508 Phocoena phocoena		Phocoena	phocoena
CN 511 Phocoena phocoena		Phocoena	phocoena
CN 512 Phocoena phocoena		Phocoena	phocoena
CN 513 Phocoena phocoena		Phocoena	phocoena
CN 514 Phocoena phocoena		Phocoena	phocoena
CN 515 Phocoena phocoena		Phocoena	phocoena
CN 516 Phocoena phocoena		Phocoena	phocoena
CN 517 Phocoena phocoena		Phocoena	phocoena
CN 518 Phocoena phocoena		Phocoena	phocoena
CN 519 Phocoena phocoena		Phocoena	phocoena
CN 520 Phocoena phocoena		Phocoena	phocoena
CN 521 Phocoena phocoena		Phocoena	phocoena
CN 522 Phocoena phocoena		Phocoena	phocoena
CN 524 Phocoena phocoena		Phocoena	phocoena
CN 525 Phocoena phocoena		Phocoena	phocoena
CN 526 Phocoena phocoena		Phocoena	phocoena
CN 527 Phocoena phocoena		Phocoena	phocoena
CN 528 Phocoena phocoena		Phocoena	phocoena
CN 529 Phocoena phocoena		Phocoena	phocoena
CN 530 Phocoena phocoena		Phocoena	phocoena
CN 531 Phocoena phocoena		Phocoena	phocoena
CN 532 Phocoena phocoena		Phocoena	phocoena
CN 533 Phocoena phocoena		Phocoena	phocoena
CN 534 Phocoena phocoena		Phocoena	phocoena
CN 535 Phocoena phocoena		Phocoena	phocoena
CN 536 Phocoena phocoena		Phocoena	phocoena
CN 537 Phocoena phocoena		Phocoena	phocoena
CN 538 Phocoena phocoena		Phocoena	phocoena
CN 539 Phocoena phocoena		Phocoena	phocoena
CN 576 Phocoena phocoena		Phocoena	phocoena
CN 577 Phocoena phocoena		Phocoena	phocoena
CN 578 Phocoena phocoena		Phocoena	phocoena
CN 579 Phocoena phocoena		Phocoena	phocoena
CN 580 Phocoena phocoena		Phocoena	phocoena
CN 581 Phocoena phocoena		Phocoena	phocoena
CN 584 Phocoena phocoena		Phocoena	phocoena
CN 585 Phocoena phocoena		Phocoena	phocoena
CN 586 Phocoena phocoena		Phocoena	phocoena
CN 587 Phocoena phocoena		Phocoena	phocoena
CN 588 Phocoena phocoena		Phocoena	phocoena
CN 589 Phocoena phocoena		Phocoena	phocoena
CN 590 Phocoena phocoena		Phocoena	phocoena
CN 591 Phocoena phocoena		Phocoena	phocoena
CN 592 Phocoena phocoena		Phocoena	phocoena
CN 593 Phocoena phocoena		Phocoena	phocoena
CN 594 Phocoena phocoena		Phocoena	phocoena
CN 595 Phocoena phocoena		Phocoena	phocoena
CN 596 Phocoena phocoena		Phocoena	phocoena
CN 597 Phocoena phocoena		Phocoena	phocoena
CN 598 Phocoena phocoena		Phocoena	phocoena
CN 601 Phocoena phocoena		Phocoena	phocoena
CN 602 Phocoena phocoena		Phocoena	phocoena
CN 603 Phocoena phocoena		Phocoena	phocoena
CN 606 Phocoena phocoena		Phocoena	phocoena
CN 607 Phocoena phocoena		Phocoena	phocoena
CN 608 Phocoena phocoena		Phocoena	phocoena
CN 609 Phocoena phocoena		Phocoena	phocoena
CN 610 Phocoena phocoena		Phocoena	phocoena
CN 611 Phocoena phocoena		Phocoena	phocoena
CN 612 Phocoena phocoena		Phocoena	phocoena
CN 613 Phocoena phocoena		Phocoena	phocoena
CN 614 Phocoena phocoena		Phocoena	phocoena
CN 616 Phocoena phocoena		Phocoena	phocoena
CN 623 Phocoena phocoena		Phocoena	phocoena
CN 64 Phocoena phocoena		Phocoena	phocoena
CN 645 Phocoena phocoena		Phocoena	phocoena
CN 646 Phocoena phocoena		Phocoena	phocoena
CN 647 Phocoena phocoena		Phocoena	phocoena
CN 648 Phocoena phocoena		Phocoena	phocoena
CN 649 Phocoena phocoena		Phocoena	phocoena
CN 650 Phocoena phocoena		Phocoena	phocoena
CN 651 Phocoena phocoena		Phocoena	phocoena
CN 652 Phocoena phocoena		Phocoena	phocoena
CN 655 Phocoena phocoena		Phocoena	phocoena
CN 656 Phocoena phocoena		Phocoena	phocoena
CN 661 Phocoena phocoena		Phocoena	phocoena
CN 662 Phocoena phocoena		Phocoena	phocoena
CN 663 Phocoena phocoena		Phocoena	phocoena
CN 664 Phocoena phocoena		Phocoena	phocoena
CN 665 Phocoena phocoena		Phocoena	phocoena
CN 666 Phocoena phocoena		Phocoena	phocoena
CN 667 Phocoena phocoena		Phocoena	phocoena
CN 668 Phocoena phocoena		Phocoena	phocoena
CN 669 Phocoena phocoena		Phocoena	phocoena
CN 670 Phocoena phocoena		Phocoena	phocoena
CN 673 Phocoena phocoena		Phocoena	phocoena
CN 674 Phocoena phocoena		Phocoena	phocoena
CN 675 Phocoena phocoena		Phocoena	phocoena
CN 676 Phocoena phocoena		Phocoena	phocoena
CN 679 Phocoena phocoena		Phocoena	phocoena
CN 68 Phocoena phocoena		Phocoena	phocoena
CN 680 Phocoena phocoena		Phocoena	phocoena
CN 681 Phocoena phocoena		Phocoena	phocoena
CN 684 Phocoena phocoena		Phocoena	phocoena
CN 685 Phocoena phocoena		Phocoena	phocoena
CN 686 Phocoena phocoena		Phocoena	phocoena
CN 687 Phocoena phocoena		Phocoena	phocoena
CN 688 Phocoena phocoena		Phocoena	phocoena
CN 689 Phocoena phocoena		Phocoena	phocoena
CN 690 Phocoena phocoena		Phocoena	phocoena
CN 692 Phocoena phocoena		Phocoena	phocoena
CN 693 Phocoena phocoena		Phocoena	phocoena
CN 694 Phocoena phocoena		Phocoena	phocoena
CN 695 Phocoena phocoena		Phocoena	phocoena
CN 696 Phocoena phocoena		Phocoena	phocoena
CN 697 Phocoena phocoena		Phocoena	phocoena
CN 698 Phocoena phocoena		Phocoena	phocoena
CN 699 Phocoena phocoena		Phocoena	phocoena
CN 700 Phocoena phocoena		Phocoena	phocoena
CN 701 Phocoena phocoena		Phocoena	phocoena
CN 702 Phocoena phocoena		Phocoena	phocoena
CN 703 Phocoena phocoena		Phocoena	phocoena
CN 704 Phocoena phocoena		Phocoena	phocoena
CN 706 Phocoena phocoena		Phocoena	phocoena
CN 707 Phocoena phocoena		Phocoena	phocoena
CN 708 Phocoena phocoena		Phocoena	phocoena
CN 710 Phocoena phocoena		Phocoena	phocoena
CN 711 Phocoena phocoena		Phocoena	phocoena
CN 713 Phocoena phocoena		Phocoena	phocoena
CN 715 Phocoena phocoena		Phocoena	phocoena
CN 716 Phocoena phocoena		Phocoena	phocoena
CN 717 Phocoena phocoena		Phocoena	phocoena
CN 718 Phocoena phocoena		Phocoena	phocoena
CN 737 Phocoena phocoena		Phocoena	phocoena
CN 738 Phocoena phocoena		Phocoena	phocoena
CN 739 Phocoena phocoena		Phocoena	phocoena
CN 748 Phocoena phocoena		Phocoena	phocoena
CN 749 Phocoena phocoena		Phocoena	phocoena
CN 750 Phocoena phocoena		Phocoena	phocoena
CN 751 Phocoena phocoena		Phocoena	phocoena
CN 757 Phocoena phocoena		Phocoena	phocoena
CN 758 Phocoena phocoena		Phocoena	phocoena
CN 759 Phocoena phocoena		Phocoena	phocoena
CN 760 Phocoena phocoena		Phocoena	phocoena
CN 761 Phocoena phocoena		Phocoena	phocoena
CN 762 Phocoena phocoena		Phocoena	phocoena
CN 763 Phocoena phocoena		Phocoena	phocoena
CN 764 Phocoena phocoena		Phocoena	phocoena
CN 765 Phocoena phocoena		Phocoena	phocoena
CN 766 Phocoena phocoena		Phocoena	phocoena
CN 767 Phocoena phocoena		Phocoena	phocoena
CN 768 Phocoena phocoena		Phocoena	phocoena
CN 769 Phocoena phocoena		Phocoena	phocoena
CN 770 Phocoena phocoena		Phocoena	phocoena
CN 771 Phocoena phocoena		Phocoena	phocoena
CN 773 Phocoena phocoena		Phocoena	phocoena
CN 774 Phocoena phocoena		Phocoena	phocoena
CN 775 Phocoena phocoena		Phocoena	phocoena
CN 776 Phocoena phocoena		Phocoena	phocoena
CN 777 Phocoena phocoena		Phocoena	phocoena
CN 778 Phocoena phocoena		Phocoena	phocoena
CN 779 Phocoena phocoena		Phocoena	phocoena
CN 780 Phocoena phocoena		Phocoena	phocoena
CN 783 Phocoena phocoena		Phocoena	phocoena
CN 784 Phocoena phocoena		Phocoena	phocoena
CN 785 Phocoena phocoena		Phocoena	phocoena
CN 786 Phocoena phocoena		Phocoena	phocoena
CN 787 Phocoena phocoena		Phocoena	phocoena
CN 788 Phocoena phocoena		Phocoena	phocoena
CN 789 Phocoena phocoena		Phocoena	phocoena
CN 790 Phocoena phocoena		Phocoena	phocoena
CN 791 Phocoena phocoena		Phocoena	phocoena
CN 792 Phocoena phocoena		Phocoena	phocoena
CN 793 Phocoena phocoena		Phocoena	phocoena
CN 794 Phocoena phocoena		Phocoena	phocoena
CN 795 Phocoena phocoena		Phocoena	phocoena
CN 796 Phocoena phocoena		Phocoena	phocoena
CN 799 Phocoena phocoena		Phocoena	phocoena
CN 800 Phocoena phocoena		Phocoena	phocoena
CN 801 Phocoena phocoena		Phocoena	phocoena
CN 803 Phocoena phocoena		Phocoena	phocoena
CN 804 Phocoena phocoena		Phocoena	phocoena
CN 806 Phocoena phocoena		Phocoena	phocoena
CN 807 Phocoena phocoena		Phocoena	phocoena
CN 809 Phocoena phocoena		Phocoena	phocoena
CN 81 Phocoena phocoena		Phocoena	phocoena
CN 810 Phocoena phocoena		Phocoena	phocoena
CN 811 Phocoena phocoena		Phocoena	phocoena
CN 812 Phocoena phocoena		Phocoena	phocoena
CN 813 Phocoena phocoena		Phocoena	phocoena
CN 814 Phocoena phocoena		Phocoena	phocoena
CN 815 Phocoena phocoena		Phocoena	phocoena
CN 816 Phocoena phocoena		Phocoena	phocoena
CN 817 Phocoena phocoena		Phocoena	phocoena
CN 819 Phocoena phocoena		Phocoena	phocoena
CN 820 Phocoena phocoena		Phocoena	phocoena
CN 821 Phocoena phocoena		Phocoena	phocoena
CN 822 Phocoena phocoena		Phocoena	phocoena
CN 823 Phocoena phocoena		Phocoena	phocoena
CN 824 Phocoena phocoena		Phocoena	phocoena
CN 825 Phocoena phocoena		Phocoena	phocoena
CN 826 Phocoena phocoena		Phocoena	phocoena
CN 827 Phocoena phocoena		Phocoena	phocoena
CN 828 Phocoena phocoena		Phocoena	phocoena
CN 829 Phocoena phocoena		Phocoena	phocoena
CN 830 Phocoena phocoena		Phocoena	phocoena
CN 831 Phocoena phocoena		Phocoena	phocoena
CN 832 Phocoena phocoena		Phocoena	phocoena
CN 833 Phocoena phocoena		Phocoena	phocoena
CN 834 Phocoena phocoena		Phocoena	phocoena
CN 835 Phocoena phocoena		Phocoena	phocoena
CN 836 Phocoena phocoena		Phocoena	phocoena
CN 837 Phocoena phocoena		Phocoena	phocoena
CN 838 Phocoena phocoena		Phocoena	phocoena
CN 839 Phocoena phocoena		Phocoena	phocoena
CN 840 Phocoena phocoena		Phocoena	phocoena
CN 841 Phocoena phocoena		Phocoena	phocoena
CN 842 Phocoena phocoena		Phocoena	phocoena
CN 843 Phocoena phocoena		Phocoena	phocoena
CN 844 Phocoena phocoena		Phocoena	phocoena
CN 845 Phocoena phocoena		Phocoena	phocoena
CN 846 Phocoena phocoena		Phocoena	phocoena
CN 847 Phocoena phocoena		Phocoena	phocoena
CN 848 Phocoena phocoena		Phocoena	phocoena
CN 849 Phocoena phocoena		Phocoena	phocoena
CN 853 Phocoena phocoena		Phocoena	phocoena
CN 854 Phocoena phocoena		Phocoena	phocoena
CN 855 Phocoena phocoena		Phocoena	phocoena
CN 856 Phocoena phocoena		Phocoena	phocoena
CN 857 Phocoena phocoena		Phocoena	phocoena
CN 858 Phocoena phocoena		Phocoena	phocoena
CN 859 Phocoena phocoena		Phocoena	phocoena
CN 860 Phocoena phocoena		Phocoena	phocoena
CN 861 Phocoena phocoena		Phocoena	phocoena
CN 862 Phocoena phocoena		Phocoena	phocoena
CN 863 Phocoena phocoena		Phocoena	phocoena
CN 864 Phocoena phocoena		Phocoena	phocoena
CN 865 Phocoena phocoena		Phocoena	phocoena
CN 866 Phocoena phocoena		Phocoena	phocoena
CN 867 Phocoena phocoena		Phocoena	phocoena
CN 868 Phocoena phocoena		Phocoena	phocoena
CN 869 Phocoena phocoena		Phocoena	phocoena
CN 870 Phocoena phocoena		Phocoena	phocoena
CN 871 Phocoena phocoena		Phocoena	phocoena
CN 872 Phocoena phocoena		Phocoena	phocoena
CN 873 Phocoena phocoena		Phocoena	phocoena
CN 874 Phocoena phocoena		Phocoena	phocoena
CN 875 Phocoena phocoena		Phocoena	phocoena
CN 876 Phocoena phocoena		Phocoena	phocoena
CN 877 Phocoena phocoena		Phocoena	phocoena
CN 878 Phocoena phocoena		Phocoena	phocoena
CN 879 Phocoena phocoena		Phocoena	phocoena
CN 880 Phocoena phocoena		Phocoena	phocoena
CN 881 Phocoena phocoena		Phocoena	phocoena
CN 882 Phocoena phocoena		Phocoena	phocoena
CN 883 Phocoena phocoena		Phocoena	phocoena
CN 884 Phocoena phocoena		Phocoena	phocoena
CN 885 Phocoena phocoena		Phocoena	phocoena
CN 886 Phocoena phocoena		Phocoena	phocoena
CN 887 Phocoena phocoena		Phocoena	phocoena
CN 889 Phocoena phocoena		Phocoena	phocoena
CN 890 Phocoena phocoena		Phocoena	phocoena
CN 891 Phocoena phocoena		Phocoena	phocoena
CN 892 Phocoena phocoena		Phocoena	phocoena
CN 893 Phocoena phocoena		Phocoena	phocoena
CN 894 Phocoena phocoena		Phocoena	phocoena
CN 897 Phocoena phocoena		Phocoena	phocoena
CN 899 Phocoena phocoena		Phocoena	phocoena
CN 90 Phocoena phocoena		Phocoena	phocoena
CN 900 Phocoena phocoena		Phocoena	phocoena
CN 949 Phocoena phocoena		Phocoena	phocoena
CN 950 Phocoena phocoena		Phocoena	phocoena
CN 952 Phocoena phocoena		Phocoena	phocoena
CN 953 Phocoena phocoena		Phocoena	phocoena
CN 954 Phocoena phocoena		Phocoena	phocoena
CN 955 Phocoena phocoena		Phocoena	phocoena
CN 955 Phocoena phocoena		Phocoena	phocoena
CN 956 Phocoena phocoena		Phocoena	phocoena
CN 958 Phocoena phocoena		Phocoena	phocoena
CN 959 Phocoena phocoena		Phocoena	phocoena
CN 960 Phocoena phocoena		Phocoena	phocoena
CN 961 Phocoena phocoena		Phocoena	phocoena
CN 962 Phocoena phocoena		Phocoena	phocoena
CN 963 Phocoena phocoena		Phocoena	phocoena
CN 964 Phocoena phocoena		Phocoena	phocoena
CN 965 Phocoena phocoena		Phocoena	phocoena
CN 966 Phocoena phocoena		Phocoena	phocoena
CN 967 Phocoena phocoena		Phocoena	phocoena
CN 969 Phocoena phocoena		Phocoena	phocoena
CN 971 Phocoena phocoena		Phocoena	phocoena
CN 972 Phocoena phocoena		Phocoena	phocoena
CN 973 Phocoena phocoena		Phocoena	phocoena
CN 974 Phocoena phocoena		Phocoena	phocoena
CN 975 Phocoena phocoena		Phocoena	phocoena
CN 976 Phocoena phocoena		Phocoena	phocoena
CN 977 Phocoena phocoena		Phocoena	phocoena
CN 978 Phocoena phocoena		Phocoena	phocoena
CN 979 Phocoena phocoena		Phocoena	phocoena
CN 980 Phocoena phocoena		Phocoena	phocoena
CN 981 Phocoena phocoena		Phocoena	phocoena
CN 982 Phocoena phocoena		Phocoena	phocoena
CN 983 Phocoena phocoena		Phocoena	phocoena
CN 984 Phocoena phocoena		Phocoena	phocoena
CN 985 Phocoena phocoena		Phocoena	phocoena
CN 986 Phocoena phocoena		Phocoena	phocoena
CN 987 Phocoena phocoena		Phocoena	phocoena
CN 988 Phocoena phocoena		Phocoena	phocoena
CN 989 Phocoena phocoena		Phocoena	phocoena
CN 990 Phocoena phocoena		Phocoena	phocoena
CN 991 Phocoena phocoena		Phocoena	phocoena
CN 993 Phocoena phocoena		Phocoena	phocoena
CN 994 Phocoena phocoena		Phocoena	phocoena
CN 995 Phocoena phocoena		Phocoena	phocoena
CN 996 Phocoena phocoena		Phocoena	phocoena
CN 997 Phocoena phocoena		Phocoena	phocoena
CN 998 Phocoena phocoena		Phocoena	phocoena
CN 999 Phocoena phocoena		Phocoena	phocoena
FM 11 Phocoena phocoena		Phocoena	phocoena
FM 111 Phocoena phocoena		Phocoena	phocoena
FM 112 Phocoena phocoena		Phocoena	phocoena
FM 113 Phocoena phocoena		Phocoena	phocoena
FM 117 Phocoena phocoena		Phocoena	phocoena
FM 12 Phocoena phocoena		Phocoena	phocoena
FM 16 Phocoena phocoena		Phocoena	phocoena
FM 17 Phocoena phocoena		Phocoena	phocoena
FM 19 Phocoena phocoena		Phocoena	phocoena
FM 2 Phocoena phocoena		Phocoena	phocoena
FM 20 Phocoena phocoena		Phocoena	phocoena
FM 21 Phocoena phocoena		Phocoena	phocoena
FM 22 Phocoena phocoena		Phocoena	phocoena
FM 23 Phocoena phocoena		Phocoena	phocoena
FM 28 Phocoena phocoena		Phocoena	phocoena
FM 29 Phocoena phocoena		Phocoena	phocoena
FM 3 Phocoena phocoena		Phocoena	phocoena
FM 30 Phocoena phocoena		Phocoena	phocoena
FM 31 Phocoena phocoena		Phocoena	phocoena
FM 32 Phocoena phocoena		Phocoena	phocoena
FM 33 Phocoena phocoena		Phocoena	phocoena
FM 34 Phocoena phocoena		Phocoena	phocoena
FM 35 Phocoena phocoena		Phocoena	phocoena
FM 36 Phocoena phocoena		Phocoena	phocoena
FM 37 Phocoena phocoena		Phocoena	phocoena
FM 38 Phocoena phocoena		Phocoena	phocoena
FM 39 Phocoena phocoena		Phocoena	phocoena
FM 4 Phocoena phocoena		Phocoena	phocoena
FM 40 Phocoena phocoena		Phocoena	phocoena
FM 41 Phocoena phocoena		Phocoena	phocoena
FM 52 Phocoena phocoena		Phocoena	phocoena
FM 56 Phocoena phocoena		Phocoena	phocoena
FM 59 Phocoena phocoena		Phocoena	phocoena
FM 62 Phocoena phocoena		Phocoena	phocoena
FM 66 Phocoena phocoena		Phocoena	phocoena
FM 72 Phocoena phocoena		Phocoena	phocoena
FM 74 Phocoena phocoena		Phocoena	phocoena
FM 85 Phocoena phocoena		Phocoena	phocoena
FM 86 Phocoena phocoena		Phocoena	phocoena
FM 88 Phocoena phocoena		Phocoena	phocoena
FM 94 Phocoena phocoena		Phocoena	phocoena
M 1069 Phocoena phocoena		Phocoena	phocoena
M 1070 Phocoena phocoena		Phocoena	phocoena
M 1071 Phocoena phocoena		Phocoena	phocoena
M 1072 Phocoena phocoena		Phocoena	phocoena
M 1073 Phocoena phocoena		Phocoena	phocoena
M 1074 Phocoena phocoena		Phocoena	phocoena
M 1075 Phocoena phocoena		Phocoena	phocoena
M 1076 Phocoena phocoena		Phocoena	phocoena
M 1077 Phocoena phocoena		Phocoena	phocoena
M 1078 Phocoena phocoena		Phocoena	phocoena
M 1079 Phocoena phocoena		Phocoena	phocoena
M 1080 Phocoena phocoena		Phocoena	phocoena
M 1081 Phocoena phocoena		Phocoena	phocoena
M 1082 Phocoena phocoena		Phocoena	phocoena
M 1083 Phocoena phocoena		Phocoena	phocoena
M 1084 Phocoena phocoena		Phocoena	phocoena
M 1085 Phocoena phocoena		Phocoena	phocoena
M 1086 Phocoena phocoena		Phocoena	phocoena
MCE 1106 Phocoena phocoena		Phocoena	phocoena
MCE 1107 Phocoena phocoena		Phocoena	phocoena
MCE 1108 Phocoena phocoena		Phocoena	phocoena
MCE 1109 Phocoena phocoena		Phocoena	phocoena
MCE 1110 Phocoena phocoena		Phocoena	phocoena
MCE 1111 Phocoena phocoena		Phocoena	phocoena
MCE 1112 Phocoena phocoena		Phocoena	phocoena
MCE 1113 Phocoena phocoena		Phocoena	phocoena
MCE 1114 Phocoena phocoena		Phocoena	phocoena
MCE 1116 Phocoena phocoena		Phocoena	phocoena
MCE 1117 Phocoena phocoena		Phocoena	phocoena
MCE 1118 Phocoena phocoena		Phocoena	phocoena
MCE 1119 Phocoena phocoena		Phocoena	phocoena
MCE 1120 Phocoena phocoena		Phocoena	phocoena
MCE 1121 Phocoena phocoena		Phocoena	phocoena
MCE 1122 Phocoena phocoena		Phocoena	phocoena
MCE 1123 Phocoena phocoena		Phocoena	phocoena
MCE 1124 Phocoena phocoena		Phocoena	phocoena
MCE 1125 Phocoena phocoena		Phocoena	phocoena
MCE 1126 Phocoena phocoena		Phocoena	phocoena
MCE 1127 Phocoena phocoena		Phocoena	phocoena
MCE 1128 Phocoena phocoena		Phocoena	phocoena
MCE 1129 Phocoena phocoena		Phocoena	phocoena
MCE 1130 Phocoena phocoena		Phocoena	phocoena
MCE 1131 Phocoena phocoena		Phocoena	phocoena
MCE 1132 Phocoena phocoena		Phocoena	phocoena
MCE 1133 Phocoena phocoena		Phocoena	phocoena
MCE 1281 Phocoena phocoena		Phocoena	phocoena
MCE 1290 Phocoena phocoena		Phocoena	phocoena
MCE 1295 Phocoena phocoena		Phocoena	phocoena
MCE 1300 Phocoena phocoena		Phocoena	phocoena
MCE 1613 Phocoena phocoena		Phocoena	phocoena												Eschricht collection of innominates
MCE 1674 Phocoena phocoena		Phocoena	phocoena
CN 17a Balaenoptera physalus		Balaenoptera	physalus
CN 17b Balaenoptera physalus		Balaenoptera	physalus
CN 19 Balaenoptera physalus		Balaenoptera	physalus
CN 22 Balaenoptera physalus		Balaenoptera	physalus
CN 24a Balaenoptera physalus		Balaenoptera	physalus
CN 24b Balaenoptera physalus		Balaenoptera	physalus
CN 27 Balaenoptera physalus		Balaenoptera	physalus
CN 29 Balaenoptera physalus		Balaenoptera	physalus
CN 30 Balaenoptera physalus		Balaenoptera	physalus
CN 31 Balaenoptera physalus		Balaenoptera	physalus
CN 12 Tursiops parvimanus		Tursiops	truncatus
CN 23 Tursiops truncatus		Tursiops	truncatus
CN 24 Tursiops truncatus		Tursiops	truncatus
CN 25 Tursiops truncatus		Tursiops	truncatus
CN 269 Tursiops truncatus (=tursio)		Tursiops	truncatus
CN 28 Tursiops truncatus		Tursiops	truncatus
CN 7 Tursiops truncatus		Tursiops	truncatus
CN 9 Tursiops truncatus		Tursiops	truncatus
CN Tursiops truncatus		Tursiops	truncatus
CN 21 Tursiops tursio		Tursiops	truncatus
CN 7 Tursiops tursio		Tursiops	truncatus
unnumbered 3 scapulae + 2 boxes wth div, and 4 tooth whale skulls
unnumbered radius, ulna, very large
unnumbered, box w ambra?
